# Supplementary material for: Potent inhibitors of the human RNA ligase Rlig1 highlights its role in RNA integrity maintenance under oxidative cellular stress
Source: Chem Sci. 2025 Jan 18;16(7):3313–22. doi: 10.1039/d4sc06542e (PMC11747885; doi:10.1039/d4sc06542e)
Supplement: SC-016-D4SC06542E-s001 [file SC-016-D4SC06542E-s001.xlsx]

## Sheet: HTS hits
code	uiid	molecule	1-D Distance.npi	1-D Distance	Raw data [w/o Enzym]	Raw data [w Enyzm]	CAS Number	target	pathway	Biological Activity	plate	well	iid	library	concentration	Layout	Date	Barcode	plateRow	plateColumn	Filename-Timepoint	Plate MCE	Catalog Number	productname	synonyms	M.Wt	saltdata	formula	solubility	solvent	Batch No.	quantity	url	Research Area	Clinical Information	library Kürzel	barcode
KP372-1	MCE27667C13		99.8878	385	13923	14308	1374996-60-7	Akt; PI3K	PI3K/Akt/mTOR	KP372-1, an Akt inhibitor, block signalling through the PI3K pathway and inhibit cell proliferation while inducing apoptosis of cancer cells.	27667	C13	27667C13	MedChemExpress	10mM	SM1	220725	MCE27667	3	13	220725005HYCPK27667a-2	HYCPK27667	HY-15673	KP372-1	xx	448.36	xx	C20H8N12O2	DMSO : 17.86 mg/mL (39.83 mM; Need ultrasonic)	DMSO Solution	90261	10mM * 30uL	https://www.medchemexpress.com/pdk1-akt-flt-inhibitor-1.html	Cancer	No Development Reported	MCE	HYCPK27667
BPN-15606	MCE27667E20		75.4488	1474	10332	8858	1914989-49-3	γ-secretase	Neuronal Signaling; Stem Cell/Wnt	BPN-15606 is a highly potent, orally active γ-secretase modulator (GSM), attenuates the production of Aβ42 and Aβ40 by SHSY5Y neuroblastoma cells with IC50 values of 7 nM and 17nM, respectively. BPN-15606 lowers Aβ42 and Aβ40 levels in the central nervous system of rats and mice. BPN-15606 has acceptable PK/PD properties, including bioavailability, half-life, and clearance[1].	27667	E20	27667E20	MedChemExpress	10mM	SM1	220725	MCE27667	5	20	220725005HYCPK27667a-2	HYCPK27667	HY-117482	BPN-15606	xx	418.47	xx	C23H23FN6O	DMSO : 100 mg/mL (238.97 mM; Need ultrasonic)	DMSO Solution	66788	10mM * 30uL	https://www.medchemexpress.com/bpn-15606.html	Neurological Disease	No Development Reported	MCE	HYCPK27667
GR 125743	MCE27667M14		76.4587	1429	10262	8833	148547-33-5	5-HT Receptor	GPCR/G Protein; Neuronal Signaling	GR 125743 is a selective 5-HT1B/1D receptor antagonist, with pKis of 8.85 and 8.31 for wild-type h5-HT1B and wild-type h5-HT1D, respectively. GR 125743 is used for the research of Parkinson's disease and cardiovascular diseases[1][2].	27667	M14	27667M14	MedChemExpress	10mM	SM1	220725	MCE27667	13	14	220725005HYCPK27667a-2	HYCPK27667	HY-121392	GR 125743	xx	416.52	xx	C25H28N4O2	DMSO : 100 mg/mL (240.08 mM; Need ultrasonic)	DMSO Solution	87120	10mM * 30uL	https://www.medchemexpress.com/gr-125743.html	Neurological Disease; Cardiovascular Disease	No Development Reported	MCE	HYCPK27667
MS7972	MCE27667P06		81.4632	1206	10149	8943	352553-42-5	MDM-2/p53	Apoptosis	MS7972 is a small molecule that blocks human p53 and CREB binding protein association. MS7972 can almost completely block this BRD interaction at 50 μM[1].	27667	P06	27667P06	MedChemExpress	10mM	SM1	220725	MCE27667	16	6	220725005HYCPK27667a-2	HYCPK27667	HY-119053	MS7972	xx	227.26	xx	C14H13NO2	DMSO : 100 mg/mL (440.02 mM; Need ultrasonic)	DMSO Solution	90281	10mM * 30uL	https://www.medchemexpress.com/ms7972.html	Cancer	No Development Reported	MCE	HYCPK27667
Arglabin	MCE27667P09		70.9829	1673	10558	8885	84692-91-1	Autophagy; Farnesyl Transferase; NOD-like Receptor (NLR)	Autophagy; Immunology/Inflammation; Metabolic Enzyme/Protease	Arglabin ((+)-Arglabin), a natural product isolated from Artemisia glabella, is a NLRP3 inflammasome inhibitor. Arglabin shows anti-inflammatory and antitumor activities[1]. The antitumor activity of Arglabin proceeds through its inhibition of farnesyl transferase which leads to the activation of RAS proto-oncogene[2].	27667	P09	27667P09	MedChemExpress	10mM	SM1	220725	MCE27667	16	9	220725005HYCPK27667a-2	HYCPK27667	HY-16059	Arglabin	(+)-Arglabin	246.30	Free Base	C15H18O3	DMSO : ≥ 100 mg/mL (406.01 mM)	DMSO Solution	18774	10mM * 30uL	https://www.medchemexpress.com/Arglabin.html	Cancer; Inflammation/Immunology	No Development Reported	MCE	HYCPK27667
BAY-850	MCE27671E03		70.3122	2218	12794	10576	2099142-76-2	Epigenetic Reader Domain	Epigenetics	BAY-850 is a potent and isoform selective ATPase family AAA domain-containing protein 2 (ATAD2) inhibitor, with an IC50 of 166 nM.	27671	E03	27671E03	MedChemExpress	10mM	SM1	220704	MCE27671	5	3	220704013HYCPK27671a-2	HYCPK27671	HY-119254	BAY-850	xx	654.24	Free Base	C38H44ClN5O3	DMSO : 62.5 mg/mL (95.53 mM; Need ultrasonic); H2O : < 0.1 mg/mL (ultrasonic;warming;heat to 60°C) (insoluble)	DMSO Solution	57788	10mM * 30uL	https://www.medchemexpress.com/BAY-850.html	Metabolic Disease	No Development Reported	MCE	HYCPK27671
BMVC-8C3O	MCE27671G05		99.5333	496	4337	3841	1301708-12-2	G-quadruplex	Cell Cycle/DNA Damage	BMVC-8C3O is a DNA G-quadruplexe (G4) ligand which can induce topological conversion of non-parallel to parallel forms in human telomeric DNA G4s[1].	27671	G05	27671G05	MedChemExpress	10mM	SM1	220704	MCE27671	7	5	220704013HYCPK27671a-2	HYCPK27671	HY-133234	BMVC-8C3O	xx	1042.61	Iodide	C42H53I3N4O3	DMSO : 62.5 mg/mL (59.95 mM; Need ultrasonic)	DMSO Solution	63714	10mM * 30uL	https://www.medchemexpress.com/bmvc-8c3o.html	Others	No Development Reported	MCE	HYCPK27671
3-Phenyltoxoflavin	MCE27672L15		71.558	2083	17751	15668	32502-63-9	HSP	Cell Cycle/DNA Damage; Metabolic Enzyme/Protease	3-Phenyltoxoflavin, a derivative of Toxoflavin, is an Hsp90 inhibitor, with a Kd of 585 nM for the interaction of Hsp90-TPR2A. 3-Phenyltoxoflavin has anti-cancer activity[1][2].	27672	L15	27672L15	MedChemExpress	10mM	SM1	220704	MCE27672	12	15	220704015HYCPK27672a-2	HYCPK27672	HY-125759	3-Phenyltoxoflavin	xx	269.26	xx	C13H11N5O2	DMSO : 7.14 mg/mL (26.52 mM; Need ultrasonic)	DMSO Solution	96704	10mM * 30uL	https://www.medchemexpress.com/3-phenyltoxoflavin.html	Cancer	No Development Reported	MCE	HYCPK27672
FGI-106 (tetrahydrochloride)	MCE27674E07		96.4905	429	8265	7836	1149348-10-6	HCV; HIV; Influenza Virus	Anti-infection	FGI-106 tetrahydrochloride is a potent and broad-spectrum inhibitor with inhibitory activity against multiple viruses. FGI-106 tetrahydrochloride is active against Ebola, Rift Valley and Dengue Fever viruses with EC50s of 100 nM, 800 nM and 400-900 nM, respectively. FGI-106 tetrahydrochloride also inhibits non-hemorrhagic fever viruses HCV and HIV-1 with EC50s of 200 nM and 150 nM, respectively[1…	27674	E07	27674E07	MedChemExpress	10mM	SM1	220704	MCE27674	5	7	220704019HYCPK27674a-2	HYCPK27674	HY-124618A	FGI-106 (tetrahydrochloride)	xx	604.49	Hydrochloride	C28H42Cl4N6	DMSO : 6.67 mg/mL (11.03 mM; ultrasonic and warming and adjust pH to 2 with HCl and heat to 60°C)	DMSO Solution	80239	10mM * 30uL	https://www.medchemexpress.com/fgi-106-tetrahydrochloride.html	Infection	No Development Reported	MCE	HYCPK27674
Sodium metatungstate	MCE27675A12		95.6511	673	15491	16164	12141-67-2	Phosphatase	Metabolic Enzyme/Protease	Sodium metatungstate (Sodium polyoxotungstate) is a potent ecto-nucleoside triphosphate diphosphohydrolase (ENTPDase) inhibitor, with Ki values of 2.58 μM, 3.26 μM, and 28.8 μM for NTPDase 1 (CD39), NTPDase 3 and NTPDase 2 respectively[1]. Sodium metatungstate inhibits ATP breakdown but also blocks central synaptic transmission, an action independent of NTPDase inhibition[2].	27675	A12	27675A12	MedChemExpress	10mM	SM1	220704	MCE27675	1	12	220704020HYCPK27675a-2	HYCPK27675	HY-103259	Sodium metatungstate	Sodium polyoxotungstate; POM-1	2986.01	Sodium	H2Na6O40W12	H2O : 50 mg/mL (16.74 mM; Need ultrasonic); DMSO : 50 mg/mL (16.74 mM; Need ultrasonic)	DMSO Solution	39970	10mM * 30uL	https://www.medchemexpress.com/pom1.html	Neurological Disease	No Development Reported	MCE	HYCPK27675
Tyrphostin AG 879	MCE27675C07		75.255	1883	4087	2204	148741-30-4	Apoptosis; EGFR; Trk Receptor	Apoptosis; JAK/STAT Signaling; Neuronal Signaling; Protein Tyrosine Kinase/RTK	Tyrphostin AG 879 (AG 879) is a tyrosine kinase inhibitor that inhibits TrKA phosphorylation (IC50 of 10 μM), but not TrKB and TrKC. Tyrphostin AG 879 is also a selective ErbB2 tyrosine kinase inhibitor with an IC50 of 1 μM, and has at least 500-fold higher selectivity to ErbB2 than EGFR. Tyrphostin AG 879 has anticancer activity[1][2][3].	27675	C07	27675C07	MedChemExpress	10mM	SM1	220704	MCE27675	3	7	220704020HYCPK27675a-2	HYCPK27675	HY-20878	Tyrphostin AG 879	AG 879	316.46	xx	C18H24N2OS	DMSO : 50 mg/mL (158.00 mM; Need ultrasonic)	DMSO Solution	24562	10mM * 30uL	https://www.medchemexpress.com/Tyrphostin-AG-879.html	Cancer	No Development Reported	MCE	HYCPK27675
Toxoflavin	MCE27675O06		89.8188	1019	17205	16186	84-82-2	Antibiotic; Bacterial; β-catenin	Anti-infection; Stem Cell/Wnt	Toxoflavin (Xanthothricin) is an antagonist of transcription factor 4 (TCF4)/β-catenin complex, also acts as an inhibitor of KDM4A, with antitumor activity[1][2]. Antibiotic properties.	27675	O06	27675O06	MedChemExpress	10mM	SM1	220704	MCE27675	15	6	220704020HYCPK27675a-2	HYCPK27675	HY-100760	Toxoflavin	Xanthothricin; Toxoflavine; PKF-118-310	193.16	Free Base	C7H7N5O2	H2O : 10 mg/mL (51.77 mM; ultrasonic and warming and heat to 60°C); DMSO : 25 mg/mL (129.43 mM; Need ultrasonic)	DMSO Solution	62987	10mM * 30uL	https://www.medchemexpress.com/toxoflavin.html	Cancer; Infection	No Development Reported	MCE	HYCPK27675
SGI-1027	MCE27675O22		100.421	390	8066	8456	1020149-73-8	Apoptosis; DNA Methyltransferase	Apoptosis; Epigenetics	SGI-1027 is a DNA methyltransferase (DNMT) inhibitor, with IC50s of 7.5 μM, 8 μM, and 12.5 μM for DNMT3B, DNMT3A, and DNMT1 with poly(dI-dC) as substrate.	27675	O22	27675O22	MedChemExpress	10mM	SM1	220704	MCE27675	15	22	220704020HYCPK27675a-2	HYCPK27675	HY-13962	SGI-1027	xx	461.52	Free Base	C27H23N7O	DMSO : 27 mg/mL (58.50 mM; Need ultrasonic and warming)	DMSO Solution	11454	10mM * 30uL	https://www.medchemexpress.com/SGI-1027.html	Cancer	No Development Reported	MCE	HYCPK27675
BGG463	MCE27675P09		93.5609	797	9073	8276	890129-26-7	CDK	Cell Cycle/DNA Damage	BGG463 (K03859) is an orally active type II CDK2 inhibitor[1].	27675	P09	27675P09	MedChemExpress	10mM	SM1	220704	MCE27675	16	9	220704020HYCPK27675a-2	HYCPK27675	HY-100600	BGG463	K03859	578.58	Free Base	C30H29F3N6O3	DMSO : ≥ 125 mg/mL (216.05 mM)	DMSO Solution	32941	10mM * 30uL	https://www.medchemexpress.com/BGG463.html	Others	No Development Reported	MCE	HYCPK27675
NP213 (TFA)	MCE27676C04		100.719	164	9419	9583	xx	Fungal	Anti-infection	NP213 TFA is a rapidly acting, novel, first-in-class synthetic antimicrobial peptide (AMP), has anti-fungal activities. NP213 TFA targets the fungal cytoplasmic membrane and plays it role via membrane perturbation and disruption. NP213 TFA is effective and well-tolerated in resolving nail fungal infections[1][2].	27676	C04	27676C04	MedChemExpress	10mM	SM1	220707	MCE27676	3	4	220707005HYCPK27676a-2	HYCPK27676	HY-126810A	NP213 (TFA)	xx	1207.32	Trifluoroacetate	C44H85F3N28O9	DMSO : 100 mg/mL (82.83 mM; Need ultrasonic)	DMSO Solution	96383	10mM * 30uL	https://www.medchemexpress.com/np213-tfa.html	Infection	No Development Reported	MCE	HYCPK27676
MKT-077	MCE27677H19		104.232	170	827	657	147366-41-4	HSP	Cell Cycle/DNA Damage; Metabolic Enzyme/Protease	MKT-077 is a rhodacyanine dye and also a heat shock protein 70 (Hsp70) inhibitor which exhibits significant antitumor activity.	27677	H19	27677H19	MedChemExpress	10mM	SM1	220707	MCE27677	8	19	220707007HYCPK27677a-2	HYCPK27677	HY-15096	MKT-077	FJ-776	432.00	Chloride	C21H22ClN3OS2	DMSO : 56.67 mg/mL (131.18 mM; Need ultrasonic); H2O : < 0.1 mg/mL (ultrasonic) (insoluble)	DMSO Solution	37304	10mM * 30uL	https://www.medchemexpress.com/MKT-077.html	Cancer	No Development Reported	MCE	HYCPK27677
CM-272	MCE27677I06		99.0872	449	6453	6004	1846570-31-7	Apoptosis; DNA Methyltransferase; Histone Methyltransferase	Apoptosis; Epigenetics	CM-272 is a first-in-class, potent, selective, substrate-competitive and reversible dual G9a/DNA methyltransferases (DNMTs) inhibitor with antitumor activities. CM-272 inhibits G9a, DNMT1, DNMT3A, DNMT3B and GLP with IC50s of 8 nM, 382 nM, 85 nM, 1200 nM and 2 nM, respectively. CM-272 inhibits cell proliferation and promotes apoptosis, inducing IFN-stimulated genes and immunogenic cell death[1].	27677	I06	27677I06	MedChemExpress	10mM	SM1	220707	MCE27677	9	6	220707007HYCPK27677a-2	HYCPK27677	HY-101925	CM-272	xx	478.63	xx	C28H38N4O3	DMSO : 125 mg/mL (261.16 mM; Need ultrasonic)	DMSO Solution	63799	10mM * 30uL	https://www.medchemexpress.com/cm-272.html	Cancer	No Development Reported	MCE	HYCPK27677
Obatoclax (Mesylate)	MCE27677K04		94.4219	702	1712	1010	803712-79-0	Autophagy; Bcl-2 Family; Parasite	Anti-infection; Apoptosis; Autophagy	Obatoclax Mesylate (GX15-070 Mesylate), a BH3 mimetic, is a pan-BCL-2 family proteins inhibitor with a Ki of 220 nM for BCL-2[1][2]. Obatoclax Mesylate induces autophagy-dependent cell death and targets cyclin D1 for proteasomal degradation. Obatoclax Mesylate has anti-cancer and broad-spectrum antiparasitic activity[3][4].	27677	K04	27677K04	MedChemExpress	10mM	SM1	220707	MCE27677	11	4	220707007HYCPK27677a-2	HYCPK27677	HY-10969	Obatoclax (Mesylate)	GX15-070 (Mesylate)	413.49	Mesylate	C21H23N3O4S	DMSO : 12.5 mg/mL (30.23 mM; Need ultrasonic)	DMSO Solution	63215	10mM * 30uL	https://www.medchemexpress.com/Obatoclax.html	Cancer; Infection	Phase 3	MCE	HYCPK27677
KL1333	MCE27677N21		96.7085	578	12619	12041	1800405-30-4	Mitochondrial Metabolism	Metabolic Enzyme/Protease	KL1333, a derivative of β-lapachone, is an orally available NAD+ modulator. KL1333 reacts with NAD(P)H:quinone oxidoreductase 1 (NQO1) as a substrate, resulting in increases in intracellular NAD+ levels via NADH oxidation. KL1333 improves energy metabolism and mitochondrial dysfunction in MELAS fibroblasts. KL1333 protects against Cisplatin-induced ototoxicity in mouse cochlear cultures[1][2].	27677	N21	27677N21	MedChemExpress	10mM	SM1	220707	MCE27677	14	21	220707007HYCPK27677a-2	HYCPK27677	HY-128895	KL1333	xx	240.26	Free Base	C14H12N2O2	DMSO : 250 mg/mL (1040.54 mM; Need ultrasonic)	DMSO Solution	55641	10mM * 30uL	https://www.medchemexpress.com/nqo1-activator-1.html	Metabolic Disease	Phase 1	MCE	HYCPK27677
DB1976 (dihydrochloride)	MCE27678P12		105.279	102	4703	4805	2369663-93-2	Apoptosis	Apoptosis	DB1976 dihydrochloride is a selenophene analog of DB270 and a potent and cell-permeable fully efficacious transcription factor PU.1 inhibitor. DB1976 dihydrochloride potently inhibits PU.1 binding (IC50 of 10 nM) and strongly inhibits the PU.1/DNA complex (with high DB1976-λB affinity, KD of 12 nM) in vitro. DB1976 dihydrochloride has apoptosis-inducing effect[1][2][3].	27678	P12	27678P12	MedChemExpress	10mM	SM1	220707	MCE27678	16	12	220707009HYCPK27678a-2	HYCPK27678	HY-135797A	DB1976 (dihydrochloride)	xx	520.28	Hydrochloride	C20H18Cl2N8Se	DMSO : 62.5 mg/mL (120.13 mM; Need ultrasonic); H2O : 18.33 mg/mL (35.23 mM; Need ultrasonic)	DMSO Solution	80336	10mM * 30uL	https://www.medchemexpress.com/db1976-hydrochloride.html	Cancer	No Development Reported	MCE	HYCPK27678
Methoxy-PMS	MCE27679H19		71.83	2097	6611	4514	65162-13-2	Reactive Oxygen Species	Immunology/Inflammation; Metabolic Enzyme/Protease; NF-κB	Methoxy-PMS (1-Methoxy PMS), an active oxygen formation inducer, is stable electron-transport mediator between NAD(P)H and tetrazolium dyes[1][2].	27679	H19	27679H19	MedChemExpress	10mM	SM1	220707	MCE27679	8	19	220707011HYCPK27679a-2	HYCPK27679	HY-D0937	Methoxy-PMS	1-Methoxy PMS; 1-Methoxyphenazine methosulfate	336.36	Methylsulfate	C15H16N2O5S	H2O : 6.67 mg/mL (19.83 mM; Need ultrasonic); DMSO : 30 mg/mL (89.19 mM; Need ultrasonic and warming)	DMSO Solution	60878	10mM * 30uL	https://www.medchemexpress.com/Methoxy-PMS.html	Others	No Development Reported	MCE	HYCPK27679
Walrycin B	MCE27680E11		89.8871	868	17113	16245	878419-78-4	Antibiotic; Bacterial	Anti-infection	Walrycin B is a novel antibacterial compound specifically targeting the essential WalR response regulator. IC50 value: 0.39 ug/ml (MIC for B. subtilis 168); 3.13 ug/ml (MIC for S. aureus N315) [1] Target: bacterial WalR response regulator; Antibacterial Walrycin B is known as an analog of toxoflavin (a phytotoxin from Burkholderia glumae), which has been shown to have a strong MIC for B. subtilis…	27680	E11	27680E11	MedChemExpress	10mM	SM1	220707	MCE27680	5	11	220707013HYCPK27680a-2	HYCPK27680	HY-18219	Walrycin B	xx	337.26	Free Base	C14H10F3N5O2	DMSO : 11.5 mg/mL (34.10 mM; Need ultrasonic and warming)	DMSO Solution	11371	10mM * 30uL	https://www.medchemexpress.com/walrycin-b.html	Infection	No Development Reported	MCE	HYCPK27680
PHA-665752	MCE27680E22		79.6741	1429	6791	5362	477575-56-7	Apoptosis; Autophagy; c-Met/HGFR	Apoptosis; Autophagy; Protein Tyrosine Kinase/RTK	PHA-665752 is a selective, ATP-competitive, and active-site inhibitor of the catalytic activity of c-Met kinase (Ki=4 nM; IC50=9 nM). PHA-665752 exhibits >50-fold selectivity for c-Met compared with a panel of diverse tyrosine and serine-threonine kinases. PHA-665752 induces apoptosis and cell cycle arrest, and exhibits cytoreductive antitumor activity[1][2].	27680	E22	27680E22	MedChemExpress	10mM	SM1	220707	MCE27680	5	22	220707013HYCPK27680a-2	HYCPK27680	HY-11107	PHA-665752	xx	641.61	Free Base	C32H34Cl2N4O4S	DMSO : 50 mg/mL (77.93 mM; Need ultrasonic)	DMSO Solution	05541	10mM * 30uL	https://www.medchemexpress.com/PHA-665752.html	Cancer	No Development Reported	MCE	HYCPK27680
B-Raf IN 1	MCE27680G22		95.4397	563	7758	7195	950736-05-7	Raf	MAPK/ERK Pathway	B-Raf IN 1 is a potent and selective B-Raf kinase inhibitor with an IC50 of 24 nM.	27680	G22	27680G22	MedChemExpress	10mM	SM1	220707	MCE27680	7	22	220707013HYCPK27680a-2	HYCPK27680	HY-18227	B-Raf IN 1	xx	515.53	Free Base	C29H24F3N5O	DMSO : 65 mg/mL (126.08 mM; Need ultrasonic)	DMSO Solution	13710	10mM * 30uL	https://www.medchemexpress.com/B-Raf-IN-1.html	Cancer	No Development Reported	MCE	HYCPK27680
Leucomethylene blue (mesylate)	MCE27680J22		72.1191	1844	6227	4383	1236208-20-0	Amyloid-β	Neuronal Signaling	Leucomethylene blue (TRx0237) mesylate, an orally active second-generation tau protein aggregation inhibitor (Ki of 0.12 μM), could be used for the study of Alzheimer's Disease. Leucomethylene blue mesylate is a common reduced form of Methylene Blue, Methylene Blue is a member of the thiazine class of dyes[1][2][3].	27680	J22	27680J22	MedChemExpress	10mM	SM1	220707	MCE27680	10	22	220707013HYCPK27680a-2	HYCPK27680	HY-19948	Leucomethylene blue (mesylate)	TRx0237 (mesylate); Methylene blue leuco base (mesylate)	477.62	Mesylate	C18H27N3O6S3	H2O : 83.33 mg/mL (174.47 mM; Need ultrasonic); DMSO : 110 mg/mL (230.31 mM; Need ultrasonic)	DMSO Solution	41829	10mM * 30uL	https://www.medchemexpress.com/Leucomethylene-blue-Mesylate.html	Neurological Disease	Phase 3	MCE	HYCPK27680
Murepavadin (TFA)	MCE27681A09		96.9338	626	9235	8609	xx	Antibiotic; Bacterial	Anti-infection	Murepavadin (TFA), a 14-amino-acid cyclic peptide, is a highly potent, specific antibiotic for the treatment of bacterial infections caused by Pseudomonas aeruginosa. Murepavadin (TFA) targets the lipopolysaccharide transport portin D [1].	27681	A09	27681A09	MedChemExpress	10mM	SM1	220707	MCE27681	1	9	220707015HYCPK27681a-2	HYCPK27681	HY-P1674A	Murepavadin (TFA)	POL7080 (TFA)	1667.83	Trifluoroacetate	C73H112N22O16.C2HF3O2	H2O	DMSO Solution	45045	10mM * 30uL	https://www.medchemexpress.com/murepavadin-tfa.html	Infection	Phase 3	MCE	HYCPK27681
Targapremir-210	MCE27681A17		76.9909	1813	9690	7877	1049722-30-6	Apoptosis; MicroRNA	Apoptosis; Epigenetics	Targapremir-210 (TGP-210) is a potent and selective miR-210 (miRNA-210, microRNA-210) inhibitor. Targapremir-210 inhibits pre-miR-210 processing with high binding affinity (Kd~200 nM)[1].	27681	A17	27681A17	MedChemExpress	10mM	SM1	220707	MCE27681	1	17	220707015HYCPK27681a-2	HYCPK27681	HY-15861	Targapremir-210	TGP-210	592.69	Free Base	C32H36N10O2	DMSO : 250 mg/mL (421.81 mM; Need ultrasonic)	DMSO Solution	58641	10mM * 30uL	https://www.medchemexpress.com/Targapremir-210.html	Cancer	No Development Reported	MCE	HYCPK27681
Daun02	MCE27681F20		83.3585	1434	3545	2111	290304-24-4	ADC Cytotoxin; Topoisomerase	Antibody-drug Conjugate/ADC Related; Cell Cycle/DNA Damage	Daun02 is a prodrug of the topoisomerase inhibitor Daunorubicin.	27681	F20	27681F20	MedChemExpress	10mM	SM1	220707	MCE27681	6	20	220707015HYCPK27681a-2	HYCPK27681	HY-13061	Daun02	xx	884.79	Free Base	C41H44N2O20	DMSO : ≥ 100 mg/mL (113.02 mM)	DMSO Solution	33696	10mM * 30uL	https://www.medchemexpress.com/daun02.html	Cancer	No Development Reported	MCE	HYCPK27681
AZ82	MCE27681F21		96.1946	670	9443	8773	1449578-65-7	Kinesin	Cell Cycle/DNA Damage; Cytoskeleton	AZ82 is a selective kinesin-like protein KIFC1 (HSET/KIFC1) inhibitor, with a Ki of 43 nM and an IC50 of 300 nM for KIFC1.	27681	F21	27681F21	MedChemExpress	10mM	SM1	220707	MCE27681	6	21	220707015HYCPK27681a-2	HYCPK27681	HY-12241	AZ82	xx	560.63	Free Base	C28H31F3N4O3S	DMSO : 125 mg/mL (222.96 mM; Need ultrasonic)	DMSO Solution	38935	10mM * 30uL	https://www.medchemexpress.com/AZ82.html	Cancer	No Development Reported	MCE	HYCPK27681
LDN-212854	MCE27682F08		85.2649	1181	8589	7408	1432597-26-6	TGF-β Receptor	TGF-beta/Smad	LDN-212854 is a novel BMP inhibitor that exhibits substantially greater selectivity for BMP versus the TGF-β type I receptors; possesses a bias towards ALK2(IC50=1.3 nM) versus ALK1 and ALK3 compared to other inhibitors. IC50 value: 1.3 nM [1] Target: ALK2 In vitro, LDN-212854 exhibits some selectivity for ALK2 in preference to other BMP type I receptors, ALK1 and ALK3, which may permit the inter…	27682	F08	27682F08	MedChemExpress	10mM	SM1	220707	MCE27682	6	8	220707017HYCPK27682a-2	HYCPK27682	HY-15897	LDN-212854	xx	406.48	Free Base	C25H22N6	DMSO : ≥ 30 mg/mL (73.80 mM)	DMSO Solution	19905	10mM * 30uL	https://www.medchemexpress.com/LDN-212854.html	Cancer	No Development Reported	MCE	HYCPK27682
SDZ 220-581	MCE27682N20		76.8207	1679	26550	24871	174575-17-8	iGluR	Membrane Transporter/Ion Channel; Neuronal Signaling	SDZ 220-581 is an orally active, potent, competitive NMDA receptor antagonist with pKi value of 7.7[1].	27682	N20	27682N20	MedChemExpress	10mM	SM1	220707	MCE27682	14	20	220707017HYCPK27682a-2	HYCPK27682	HY-13059	SDZ 220-581	xx	369.74	Free Acid	C16H17ClNO5P	DMSO : 8.57 mg/mL (23.18 mM; Need ultrasonic and warming)	DMSO Solution	11469	10mM * 30uL	https://www.medchemexpress.com/SDZ-220-581.html	Neurological Disease	No Development Reported	MCE	HYCPK27682
AMXT-1501 tetrahydrochloride	MCE27683A13		103.958	45	4897	4942	xx	Apoptosis	Apoptosis	AMXT-1501 tetrahydrochloride is an orally active polyamine transport inhibitor. AMXT1501 blocks tumor growth in immunocompetent mice but not in athymic nude mice lacking T cells[1]. Combination of DFMO and AMXT‐1501 induces caspase‐3 mediated apoptosis in NB cell lines[2].	27683	A13	27683A13	MedChemExpress	10mM	SM1	220707	MCE27683	1	13	220707019HYCPK27683a-2	HYCPK27683	HY-124617A	AMXT-1501 tetrahydrochloride	xx	714.77	Hydrochloride	C32H72Cl4N6O2	H2O : 83.33 mg/mL (116.58 mM; Need ultrasonic)	DMSO Solution	45883	10mM * 30uL	https://www.medchemexpress.com/AMXT-1501_tetrahydrochloride.html	Cancer; Inflammation/Immunology	Phase 1	MCE	HYCPK27683
THZ1 (Hydrochloride)	MCE27683O13		99.9172	289	5741	6030	xx	CDK	Cell Cycle/DNA Damage	THZ1 Hydrochloride is a selective and potent covalent CDK7 inhibitor with an IC50 of 3.2 nM. THZ1 Hydrochloride also inhibits the closely related kinases CDK12 and CDK13 and downregulates MYC expression[1][2].	27683	O13	27683O13	MedChemExpress	10mM	SM1	220707	MCE27683	15	13	220707019HYCPK27683a-2	HYCPK27683	HY-80013A	THZ1 (Hydrochloride)	xx	602.51	Hydrochloride	C31H29Cl2N7O2	H2O : < 0.1 mg/mL (ultrasonic;warming;heat to 60°C) (insoluble); DMSO : 22.5 mg/mL (37.34 mM; Need ultrasonic and warming)	DMSO Solution	46591	10mM * 30uL	https://www.medchemexpress.com/THZ1-Hydrochloride.html	Cancer	No Development Reported	MCE	HYCPK27683
NSC-87877	MCE27684B05		87.5142	982	2002	1020	56990-57-9	Apoptosis; Phosphatase	Apoptosis; Metabolic Enzyme/Protease	NSC-87877 is a potent inhibitor of Shp2 and Shp1 protein tyrosine phosphatases (SH-PTP2 and SH-PTP1), with IC50 values of 0.318 μM, 0.355 μM shp2 and shp1, respectively[1]. NSC-87877 also inhibits dual-specificity phosphatase 26 (DUSP26)[2].	27684	B05	27684B05	MedChemExpress	10mM	SM1	220707	MCE27684	2	5	220707021HYCPK27684a-2	HYCPK27684	HY-18756	NSC-87877	xx	459.45	Free Acid	C19H13N3O7S2	DMSO : 25 mg/mL (54.41 mM; ultrasonic and warming and heat to 60°C)	DMSO Solution	64157	10mM * 30uL	https://www.medchemexpress.com/nsc-87877.html	Others	No Development Reported	MCE	HYCPK27684
10074-G5	MCE27684L13		91.4368	758	2173	1415	413611-93-5	Autophagy; c-Myc	Apoptosis; Autophagy	10074-G5 is an inhibitor of c-Myc-Max dimerization with an IC50 of 146 μM.	27684	L13	27684L13	MedChemExpress	10mM	SM1	220707	MCE27684	12	13	220707021HYCPK27684a-2	HYCPK27684	HY-100996	10074-G5	xx	332.31	Free Base	C18H12N4O3	DMSO : ≥ 28 mg/mL (84.26 mM)	DMSO Solution	24168	10mM * 30uL	https://www.medchemexpress.com/10074-G5.html	Cancer	No Development Reported	MCE	HYCPK27684
PGMI-004A	MCE27684N12		78.7935	1480	3702	2222	1313738-90-7	Phosphatase	Metabolic Enzyme/Protease	PGMI-004A is a potent phosphoglycerate mutase 1 (PGAM1) inhibitor with an IC50 of 13.1 μM.	27684	N12	27684N12	MedChemExpress	10mM	SM1	220707	MCE27684	14	12	220707021HYCPK27684a-2	HYCPK27684	HY-101143	PGMI-004A	xx	463.38	Free Base	C21H12F3NO6S	DMSO : ≥ 125 mg/mL (269.76 mM)	DMSO Solution	43949	10mM * 30uL	https://www.medchemexpress.com/PGMI-004A.html	Cancer	No Development Reported	MCE	HYCPK27684
CX-6258	MCE27685A13		93.2533	641	5815	5174	1202916-90-2	Pim	JAK/STAT Signaling	CX-6258 is a potent and kinase selective pan-Pim kinases inhibitor, with IC50s of 5 nM, 25 nM and 16 nM for Pim-1, Pim-2 and Pim-3, respectively[1].	27685	A13	27685A13	MedChemExpress	10mM	SM1	220707	MCE27685	1	13	220707022HYCPK27685a-2	HYCPK27685	HY-18095	CX-6258	xx	461.94	Free Base	C26H24ClN3O3	DMSO : ≥ 50 mg/mL (108.24 mM)	DMSO Solution	09636	10mM * 30uL	https://www.medchemexpress.com/cx-6258.html	Cancer	No Development Reported	MCE	HYCPK27685
ZL0420	MCE27685C11		80.8903	1352	3032	1680	2230496-80-5	Epigenetic Reader Domain	Epigenetics	ZL0420 is a potent and selective bromodomain-containing protein 4 (BRD4) inhibitor with IC50 values of 27 nM against BRD4 BD1 and 32 nM against BRD4 BD2.	27685	C11	27685C11	MedChemExpress	10mM	SM1	220707	MCE27685	3	11	220707022HYCPK27685a-2	HYCPK27685	HY-112149	ZL0420	xx	296.32	Free Base	C16H16N4O2	DMSO : 125 mg/mL (421.84 mM; Need ultrasonic)	DMSO Solution	36174	10mM * 30uL	https://www.medchemexpress.com/ZL0420.html	Inflammation/Immunology	No Development Reported	MCE	HYCPK27685
G-749	MCE27685M09		93.9141	603	8092	7489	1457983-28-6	Apoptosis; FLT3	Apoptosis; Protein Tyrosine Kinase/RTK	G-749 is a potent, oral active and ATP competitive FLT3 inhibitor, with IC50s of 0.4 nM and 0.6 nM for FLT3 wild type and FLT3-D835Y, respectively. G-749 can be used for the research of drug resistance for acute myeloid leukemia (AML)[1].	27685	M09	27685M09	MedChemExpress	10mM	SM1	220707	MCE27685	13	9	220707022HYCPK27685a-2	HYCPK27685	HY-12333	G-749	xx	521.41	Free Base	C25H25BrN6O2	DMSO : 25 mg/mL (47.95 mM; Need ultrasonic)	DMSO Solution	14629	10mM * 30uL	https://www.medchemexpress.com/G-749.html	Cancer	No Development Reported	MCE	HYCPK27685
TG 100572 (Hydrochloride)	MCE27685M18		103.738	38	3338	3376	867331-64-4	FGFR; PDGFR; Src; VEGFR	Protein Tyrosine Kinase/RTK	TG 100572 Hydrochloride is a multi-targeted kinase inhibitor which inhibits receptor tyrosine kinases and Src kinases; has IC50s of 2, 7, 2, 16, 13, 5, 0.5, 6, 0.1, 0.4, 1, 0.2 nM for VEGFR1, VEGFR2, FGFR1, FGFR2, PDGFRβ, Fgr, Fyn, Hck, Lck, Lyn, Src, Yes, respectively.	27685	M18	27685M18	MedChemExpress	10mM	SM1	220707	MCE27685	13	18	220707022HYCPK27685a-2	HYCPK27685	HY-10185	TG 100572 (Hydrochloride)	xx	512.43	Hydrochloride	C26H27Cl2N5O2	DMSO : 25 mg/mL (48.79 mM; Need ultrasonic)	DMSO Solution	18343	10mM * 30uL	https://www.medchemexpress.com/TG-100572-Hydrochloride.html	Inflammation/Immunology	No Development Reported	MCE	HYCPK27685
Brilliant Black BN	MCE27686D17		98.2105	272	1348	1620	2519-30-4	Enterovirus	Anti-infection	Brilliant black BN (E151) is an azo dye and a food colorant[1]. Brilliant black BN is a promising antiviral agent against EV71 infection via inhibiting the interaction between EV71 and its cellular uncoating factor cyclophilin A. Brilliant black BN has the potential for the investigation of contagious disease[2].	27686	D17	27686D17	MedChemExpress	10mM	SM1	220714	MCE27686	4	17	220714005HYCPK27686a-2	HYCPK27686	HY-128382	Brilliant Black BN	E 151	867.68	Sodium	C28H17N5Na4O14S4	DMSO : 125 mg/mL (144.06 mM; Need ultrasonic)	DMSO Solution	62074	10mM * 30uL	https://www.medchemexpress.com/brilliant-black-bn.html	Infection	No Development Reported	MCE	HYCPK27686
Lp-PLA2-IN-3	MCE27686E20		92.9896	555	10003	9448	2196245-16-4	Phospholipase	Metabolic Enzyme/Protease	Lp-PLA2-IN-3 is a potent and orally bioavailable lipoprotein-associated phospholipase A2 (Lp-PLA2) inhibitor, with an IC50 of 14 nM for recombinant human Lp-PLA2 (rhLpPLA2)[1].	27686	E20	27686E20	MedChemExpress	10mM	SM1	220714	MCE27686	5	20	220714005HYCPK27686a-2	HYCPK27686	HY-133149	Lp-PLA2-IN-3	xx	467.85	xx	C20H13ClF3N3O3S	DMSO : ≥ 250 mg/mL (534.36 mM)	DMSO Solution	62924	10mM * 30uL	https://www.medchemexpress.com/lp-pla2-in-3.html	Cardiovascular Disease	No Development Reported	MCE	HYCPK27686
Mibefradil (dihydrochloride)	MCE27686M14		70.2795	1786	11294	9508	116666-63-8	Calcium Channel	Membrane Transporter/Ion Channel; Neuronal Signaling	Mibefradil dihydrochloride (Ro 40-5967 dihydrochloride) is a calcium channel blocker with moderate selectivity for T-type Ca2+ channels (IC50s of 2.7 μM and 18.6 μM for T-type and L-type currents, respectively)[1].	27686	M14	27686M14	MedChemExpress	10mM	SM1	220714	MCE27686	13	14	220714005HYCPK27686a-2	HYCPK27686	HY-15553A	Mibefradil (dihydrochloride)	Ro 40-5967 (dihydrochloride)	568.55	Hydrochloride	C29H40Cl2FN3O3	H2O : ≥ 125 mg/mL (219.86 mM)	DMSO Solution	32664	10mM * 30uL	https://www.medchemexpress.com/Mibefradil-dihydrochloride.html	Cardiovascular Disease	Launched	MCE	HYCPK27686
Mevociclib	MCE27687D05		95.3899	561	5188	5749	1816989-16-8	CDK	Cell Cycle/DNA Damage	Mevociclib (SY-1365) is a potent and first-in-class selective CDK7 inhibitor, with a Ki of 17.4 nM. Mevociclib exhibits anti-proliferative and apoptotic effects in solid tumor cell lines. Mevociclib possesses anti-tumor activity in hematological and multiple aggressive solid tumors[1][2].	27687	D05	27687D05	MedChemExpress	10mM	SM1	220714	MCE27687	4	5	220714007HYCPK27687a-2	HYCPK27687	HY-128587	Mevociclib	SY-1365	587.12	Free Base	C31H35ClN8O2	DMSO : 125 mg/mL (212.90 mM; Need ultrasonic)	DMSO Solution	63779	10mM * 30uL	https://www.medchemexpress.com/sy-1365.html	Cancer	Phase 1	MCE	HYCPK27687
OSU-T315	MCE27687D11		100.019	320	5917	6237	2070015-22-2	Apoptosis; Autophagy; Integrin	Apoptosis; Autophagy; Cytoskeleton	OSU-T315 (ILK-IN-1) is a small Integrin-linked kinase (ILK) inhibitor with an IC50 of 0.6 μM, inhibiting PI3K/AKT signaling by dephosphorylation of AKT-Ser473 and other ILK targets (GSK-3β and myosin light chain)[1]. OSU-T315 abrogates AKT activation by impeding AKT localization in lipid rafts and triggers caspase-dependent apoptosis in an ILK-independent manner[2]. OSU-T315 causes cell death thr…	27687	D11	27687D11	MedChemExpress	10mM	SM1	220714	MCE27687	4	11	220714007HYCPK27687a-2	HYCPK27687	HY-18676	OSU-T315	xx	533.59	Free Base	C30H30F3N5O	DMSO : ≥ 260 mg/mL (487.27 mM)	DMSO Solution	43417	10mM * 30uL	https://www.medchemexpress.com/ILK-IN-1.html	Cancer	No Development Reported	MCE	HYCPK27687
Mocravimod (hydrochloride)	MCE27688C08		104.362	176	8462	8286	509088-69-1	LPL Receptor	GPCR/G Protein	Mocravimod hydrochloride (KRP-203), an immunosuppressant, is a potent and orally active S1PR1 (sphingosine 1-phosphate receptor type 1) agonist[1][2].	27688	C08	27688C08	MedChemExpress	10mM	SM1	220714	MCE27688	3	8	220714009HYCPK27688a-2	HYCPK27688	HY-13660	Mocravimod (hydrochloride)	KRP-203	480.45	Hydrochloride	C24H27Cl2NO3S	DMSO : 100 mg/mL (208.14 mM; Need ultrasonic)	DMSO Solution	111621	10mM * 30uL	https://www.medchemexpress.com/mocravimod-hydrochloride.html	Inflammation/Immunology	Phase 2	MCE	HYCPK27688
BQ-788	MCE27688E20		75.2571	1704	10323	8619	173326-37-9	Endothelin Receptor	GPCR/G Protein	BQ-788 is a potent, selective ETB receptor antagonist with IC50 of 1.2 nM for inhibition of ET-1 binding to human Girardi heart cells, poorly inhibiting the binding to ETA receptors in human neuroblastoma cell line SK-N-MC cells with IC50 of 1300 nM[1].	27688	E20	27688E20	MedChemExpress	10mM	SM1	220714	MCE27688	5	20	220714009HYCPK27688a-2	HYCPK27688	HY-15894A	BQ-788	xx	641.80	Free Acid	C34H51N5O7	DMSO : 170 mg/mL (264.88 mM; ultrasonic and warming and heat to 60°C)	DMSO Solution	111830	10mM * 30uL	https://www.medchemexpress.com/BQ-788.html	Cardiovascular Disease; Endocrinology	Phase 1	MCE	HYCPK27688
Suramin (sodium salt)	MCE27688G18		85.8095	1150	14498	13348	129-46-4	Apoptosis; Parasite; Phosphatase; Reverse Transcriptase; SARS-CoV; Sirtuin; Topoisomerase	Anti-infection; Apoptosis; Cell Cycle/DNA Damage; Epigenetics; Metabolic Enzyme/Protease	Suramin sodium salt (Suramin hexasodium salt) is a reversible and competitive protein-tyrosine phosphatases (PTPases) inhibitor[1]. Suramin sodium salt is a potent inhibitor of sirtuins: SirT1 (IC50=297 nM), SirT2 (IC50=1.15 μM), and SirT5 (IC50=22 μM)[2]. Suramin sodium salt is a competitive inhibitor of reverse transcriptase (DNA topoisomerase II: IC50=5 μM)[3][4]. Suramin sodium salt is a pote…	27688	G18	27688G18	MedChemExpress	10mM	SM1	220714	MCE27688	7	18	220714009HYCPK27688a-2	HYCPK27688	HY-B0879A	Suramin (sodium salt)	Suramin (hexasodium salt)	1429.17	Sodium	C51H34N6Na6O23S6	DMSO : 125 mg/mL (87.46 mM; Need ultrasonic); H2O : ≥ 200 mg/mL (139.94 mM)	DMSO Solution	115303	10mM * 30uL	https://www.medchemexpress.com/Suramin-sodium-salt.html	Cancer; Infection; Cardiovascular Disease	Launched	MCE	HYCPK27688
SRX3207	MCE27688I05		89.3143	966	6363	7329	2254693-15-5	PI3K; Syk	PI3K/Akt/mTOR; Protein Tyrosine Kinase/RTK	SRX3207 is an orally active and first-in-class dual Syk/PI3K inhibitor, with IC50 values of 10.7 nM and 861 nM for Syk and PI3Kα, respectively. SRX3207 relieves tumor immunosuppression[1][2].	27688	I05	27688I05	MedChemExpress	10mM	SM1	220714	MCE27688	9	5	220714009HYCPK27688a-2	HYCPK27688	HY-136198	SRX3207	xx	555.65	Free Base	C29H29N7O3S	DMSO : 5 mg/mL (9.00 mM; Need ultrasonic)	DMSO Solution	99144	10mM * 30uL	https://www.medchemexpress.com/srx3207.html	Cancer	No Development Reported	MCE	HYCPK27688
Plicamycin	MCE27688M14		70.4381	1957	11211	9254	18378-89-7	Antibiotic; Bacterial; DNA/RNA Synthesis	Anti-infection; Cell Cycle/DNA Damage	Plicamycin is a selective specificity protein 1 (Sp1) inhibitor. Plicamycin inhibits the growth of various cancers by decreasing Sp1 protein.	27688	M14	27688M14	MedChemExpress	10mM	SM1	220714	MCE27688	13	14	220714009HYCPK27688a-2	HYCPK27688	HY-A0122	Plicamycin	Mithramycin A	1085.15	Free Base	C52H76O24	DMSO : ≥ 100 mg/mL (92.15 mM)	DMSO Solution	102492	10mM * 30uL	https://www.medchemexpress.com/Plicamycin.html	Cancer; Infection	Launched	MCE	HYCPK27688
Intoplicine	MCE27689D08		75.1642	1659	8534	6875	125974-72-3	Topoisomerase	Cell Cycle/DNA Damage	Intoplicine (RP 60475), an antitumor derivative in the 7H-benzo[e]pyrido[4,3-b]indole series, is a DNA topoisomerase I and II inhibitor. Intoplicine strongly binds DNA (KA = 2 x 105 /M) and thereby increases the length of linear DNA[1][2].	27689	D08	27689D08	MedChemExpress	10mM	SM1	220714	MCE27689	4	8	220714011HYCPK27689a-2	HYCPK27689	HY-101647	Intoplicine	RP 60475	348.44	Free Base	C21H24N4O	DMSO : 80 mg/mL (229.59 mM; Need ultrasonic)	DMSO Solution	120395	10mM * 30uL	https://www.medchemexpress.com/Intoplicine.html	Cancer	Phase 1	MCE	HYCPK27689
Neticonazole (hydrochloride)	MCE27689E20		74.1423	1715	10970	9255	130773-02-3	Fungal	Anti-infection	Neticonazole hydrochloride is an imidazole derivative and a potent and long-acting antifungal agent. Neticonazole hydrochloride has anti-infection and anti-cancer effects[1][2][3].	27689	E20	27689E20	MedChemExpress	10mM	SM1	220714	MCE27689	5	20	220714011HYCPK27689a-2	HYCPK27689	HY-128365	Neticonazole (hydrochloride)	xx	338.90	Hydrochloride	C17H23ClN2OS	DMSO : 250 mg/mL (737.68 mM; Need ultrasonic); H2O : ≥ 100 mg/mL (295.07 mM)	DMSO Solution	62843	10mM * 30uL	https://www.medchemexpress.com/neticonazole-hydrochloride.html	Cancer; Infection	Launched	MCE	HYCPK27689
(1E)-CFI-400437 (dihydrochloride)	MCE27689F16		102.026	187	3882	4069	1247000-76-5	Polo-like Kinase (PLK)	Cell Cycle/DNA Damage	(1E)-CFI-400437 dihydrochloride is a potent PLK4 (IC50= 0.6 nM) inhibitor and selective against other members of the PLK family (>10 μM). (1E)-CFI-400437 dihydrochloride inhibits Aurora A, Aurora B, KDR and FLT-3 with IC50s of 0.37, 0.21, 0.48, and 0.18 μM, respectively. Antiproliferative activity[1].	27689	F16	27689F16	MedChemExpress	10mM	SM1	220714	MCE27689	6	16	220714011HYCPK27689a-2	HYCPK27689	HY-132135	(1E)-CFI-400437 (dihydrochloride)	xx	565.49	Hydrochloride	C29H30Cl2N6O2	DMSO : 12.5 mg/mL (22.10 mM; Need ultrasonic)	DMSO Solution	119686	10mM * 30uL	https://www.medchemexpress.com/1e-cfi-400437-dihydrochloride.html	Cancer	No Development Reported	MCE	HYCPK27689
Mitoxantrone (dihydrochloride)	MCE27689L08		101.642	208	3030	3238	70476-82-3	Endogenous Metabolite; PKC; Topoisomerase	Cell Cycle/DNA Damage; Epigenetics; Metabolic Enzyme/Protease; TGF-beta/Smad	Mitoxantrone dihydrochloride is a topoisomerase II inhibitor; also inhibits protein kinase C (PKC) activity with an IC50 of 8.5 μM.	27689	L08	27689L08	MedChemExpress	10mM	SM1	220714	MCE27689	12	8	220714011HYCPK27689a-2	HYCPK27689	HY-13502A	Mitoxantrone (dihydrochloride)	mitozantrone dihydrochloride	517.40	Hydrochloride	C22H30Cl2N4O6	DMSO : ≥ 43 mg/mL (83.11 mM); H2O : 100 mg/mL (193.27 mM; Need ultrasonic)	DMSO Solution	15228	10mM * 30uL	https://www.medchemexpress.com/Mitoxantrone-dihydrochloride.html	Cancer	Launched	MCE	HYCPK27689
Meclofenoxate (hydrochloride)	MCE27689M14		72.0073	1832	11312	9480	3685-84-5	iGluR; nAChR	Membrane Transporter/Ion Channel; Neuronal Signaling	Meclofenoxate hydrochloride, an ester of dimethylethanolamine (DMAE) and 4-chlorophenoxyacetic acid (pCPA), has been shown to improve memory, have a mentally stimulating effect, and improve general cognition. IC50 value: Target: nootropic Meclofenoxate, administered in a dose of 50 mg/kg twice daily for 7 days using the maze-training method, increased the number of responses to the conditioned st…	27689	M14	27689M14	MedChemExpress	10mM	SM1	220714	MCE27689	13	14	220714011HYCPK27689a-2	HYCPK27689	HY-17555	Meclofenoxate (hydrochloride)	xx	294.17	Hydrochloride	C12H17Cl2NO3	H2O : 33.33 mg/mL (113.30 mM; Need ultrasonic); DMSO : ≥ 50 mg/mL (169.97 mM)	DMSO Solution	11015	10mM * 30uL	https://www.medchemexpress.com/meclofenoxate-hydrochloride.html	Neurological Disease	Launched	MCE	HYCPK27689
Scutellarin	MCE27690M14		71.9256	1804	11122	9318	27740-01-8	Akt; HIV; STAT	Anti-infection; JAK/STAT Signaling; PI3K/Akt/mTOR; Stem Cell/Wnt	Scutellarin, an active flavone isolated from Scutellaria baicalensis, can down-regulates the STAT3/Girdin/Akt signaling in HCC cells, and inhibits RANKL-mediated MAPK and NF-κB signaling pathway in osteoclasts. Scutellarin is active against HIV-1IIIB, HIV-1(74V) and HIV-1KM018 with EC50s of 26 μM, 253 μM and 136 μM, respectively.	27690	M14	27690M14	MedChemExpress	10mM	SM1	220714	MCE27690	13	14	220714013HYCPK27690a-2	HYCPK27690	HY-N0751	Scutellarin	xx	462.36	Free Acid	C21H18O12	DMSO : 100 mg/mL (216.28 mM; Need ultrasonic)	DMSO Solution	26089	10mM * 30uL	https://www.medchemexpress.com/Scutellarin.html	Cancer; Infection	No Development Reported	MCE	HYCPK27690
Bisindolylmaleimide VIII (acetate)	MCE27690N14		70.0569	1909	4740	2831	138516-31-1	Apoptosis; PKC	Apoptosis; Epigenetics; TGF-beta/Smad	Bisindolylmaleimide VIII acetate (Ro 31-7549 acetate) is a potent and selective protein kinase C (PKC) inhibitor with an IC50 of 158 nM for rat brain PKC. Bisindolylmaleimide VIII acetate has IC50s of 53, 195, 163, 213, and 175 nM for PKC-α, PKC-βI, PKC-βII, PKC-γ, PKC-ε, respectively[1]. Bisindolylmaleimide VIII acetate facilitates Fas-mediated apoptosis and inhibits T cell-mediated autoimmune d…	27690	N14	27690N14	MedChemExpress	10mM	SM1	220714	MCE27690	14	14	220714013HYCPK27690a-2	HYCPK27690	HY-129624A	Bisindolylmaleimide VIII (acetate)	Ro 31-7549 (acetate); Bis VIII (acetate)	458.51	Acetate	C26H26N4O4	DMSO : 250 mg/mL (545.24 mM; Need ultrasonic)	DMSO Solution	119335	10mM * 30uL	https://www.medchemexpress.com/bisindolylmaleimide-viii-acetate.html	Cancer; Inflammation/Immunology	No Development Reported	MCE	HYCPK27690
Mito-LND	MCE27691F15		74.0964	1734	4259	5993	2361564-49-8	Autophagy; Mitochondrial Metabolism; Reactive Oxygen Species	Autophagy; Immunology/Inflammation; Metabolic Enzyme/Protease; NF-κB	Mito-LND (Mito-Lonidamine) is an orally active and mitochondria-targeted inhibitor of oxidative phosphorylation (OXPHOS). Mito-LND inhibits mitochondrial bioenergetics, stimulates the formation of reactive oxygen species, and induces autophagic cell death in lung cancer cells[1].	27691	F15	27691F15	MedChemExpress	10mM	SM1	220714	MCE27691	6	15	220714015HYCPK27691a-2	HYCPK27691	HY-134832	Mito-LND	Mito-Lonidamine	801.62	Bromide	C43H45BrCl2N3OP	DMSO : 50 mg/mL (62.37 mM; Need ultrasonic)	DMSO Solution	101659	10mM * 30uL	https://www.medchemexpress.com/mito-lnd.html	Cancer	No Development Reported	MCE	HYCPK27691
Doxorubicin (hydrochloride)	MCE27691G11		103.376	134	1381	1247	25316-40-9	ADC Cytotoxin; AMPK; Antibiotic; Apoptosis; Autophagy; Bacterial; HBV; HIV; Mitophagy; Topoisomerase	Antibody-drug Conjugate/ADC Related; Anti-infection; Apoptosis; Autophagy; Cell Cycle/DNA Damage; Epigenetics; PI3K/Akt/mTOR	Doxorubicin (Hydroxydaunorubicin) hydrochloride, a cytotoxic anthracycline antibiotic, is an anti-cancer chemotherapy agent. Doxorubicin hydrochloride is a potent human DNA topoisomerase I and topoisomerase II inhibitor with IC50s of 0.8 μM and 2.67 μM, respectively. Doxorubicin hydrochloride reduces basal phosphorylation of AMPK and its downstream target acetyl-CoA carboxylase. Doxorubicin hydro…	27691	G11	27691G11	MedChemExpress	10mM	SM1	220714	MCE27691	7	11	220714015HYCPK27691a-2	HYCPK27691	HY-15142	Doxorubicin (hydrochloride)	Hydroxydaunorubicin (hydrochloride)	579.98	Hydrochloride	C27H30ClNO11	DMSO : 35.71 mg/mL (61.57 mM; ultrasonic and warming and heat to 60°C); H2O : 20 mg/mL (34.48 mM; Need ultrasonic)	DMSO Solution	97451	10mM * 30uL	https://www.medchemexpress.com/Doxorubicin-hydrochloride.html	Cancer; Infection	Launched	MCE	HYCPK27691
LL-37, human (TFA)	MCE27691L10		104.017	99	6396	6495	xx	Bacterial	Anti-infection	LL-37, human TFA is a 37-residue, amphipathic, cathelicidin-derived antimicrobial peptide, which exhibits a broad spectrum of antimicrobial activity[1]. LL-37, human TFA could help protect the cornea from infection and modulates wound healing[2].	27691	L10	27691L10	MedChemExpress	10mM	SM1	220714	MCE27691	12	10	220714015HYCPK27691a-2	HYCPK27691	HY-P1222A	LL-37, human (TFA)	xx	4607.28	Trifluoroacetate	C205H340N60O53.C2HF3O2	H2O : 100 mg/mL (21.70 mM; Need ultrasonic)	DMSO Solution	119692	10mM * 30uL	https://www.medchemexpress.com/ll-37-human-tfa.html	Infection	No Development Reported	MCE	HYCPK27691
SN-38	MCE27691M14		72.669	1812	11223	9411	86639-52-3	ADC Cytotoxin; Autophagy; Topoisomerase	Antibody-drug Conjugate/ADC Related; Autophagy; Cell Cycle/DNA Damage	SN-38 (NK012) is an active metabolite of the Topoisomerase I inhibitor Irinotecan. SN-38 (NK012) inhibits DNA and RNA synthesis with IC50s of 0.077 and 1.3 μM, respectively[1][2][3][4].	27691	M14	27691M14	MedChemExpress	10mM	SM1	220714	MCE27691	13	14	220714015HYCPK27691a-2	HYCPK27691	HY-13704	SN-38	NK012	392.40	Free Base	C22H20N2O5	DMSO : 50 mg/mL (127.42 mM; ultrasonic and warming and heat to 60°C)	DMSO Solution	46992	10mM * 30uL	https://www.medchemexpress.com/SN-38.html	Cancer	Phase 2	MCE	HYCPK27691
Mitoxantrone	MCE27692A17		98.1558	308	3245	3553	65271-80-9	Endogenous Metabolite; PKC; Topoisomerase	Cell Cycle/DNA Damage; Epigenetics; Metabolic Enzyme/Protease; TGF-beta/Smad	Mitoxantrone is a topoisomerase II inhibitor; also inhibits protein kinase C (PKC) activity with an IC50 of 8.5 μM.	27692	A17	27692A17	MedChemExpress	10mM	SM1	220714	MCE27692	1	17	220714017HYCPK27692a-2	HYCPK27692	HY-13502	Mitoxantrone	mitozantrone	444.48	Free Base	C22H28N4O6	DMSO : 62.5 mg/mL (140.61 mM; Need ultrasonic); H2O : 100 mg/mL (224.98 mM; Need ultrasonic)	DMSO Solution	113119	10mM * 30uL	https://www.medchemexpress.com/mitoxantrone.html	Cancer	Launched	MCE	HYCPK27692
(-)-Alkannin	MCE27692C04		70.9637	1812	5697	3885	517-88-4	Apoptosis	Apoptosis	(-)-Alkannin, found in Alkanna tinctoria, is used as a food coloring. (-)-Alkannin shows anticancer activity, arrests cell cycle, and induces apoptosis. (-)-Alkannin improves hepatic inflammation in a Rho-kinase pathway[1][2][3].	27692	C04	27692C04	MedChemExpress	10mM	SM1	220714	MCE27692	3	4	220714017HYCPK27692a-2	HYCPK27692	HY-N6012	(-)-Alkannin	xx	288.30	Free Base	C16H16O5	DMSO : 33.33 mg/mL (115.61 mM; Need ultrasonic)	DMSO Solution	78596	10mM * 30uL	https://www.medchemexpress.com/alkannin.html	Cancer; Inflammation/Immunology	No Development Reported	MCE	HYCPK27692
MAGL-IN-1	MCE27692E20		70.8371	1819	11019	9200	2324160-91-8	MAGL	Metabolic Enzyme/Protease	MAGL-IN-1 is a potent, selective, reversible and competitive inhibitor of MAGL, with an IC50 of 80 nM. MAGL-IN-1 exhibits anti-proliferative effects against human breast, colorectal, and ovarian cancer cells. MAGL-IN-1 blocks MAGL in cell-based as well as in vivo assays[1].	27692	E20	27692E20	MedChemExpress	10mM	SM1	220714	MCE27692	5	20	220714017HYCPK27692a-2	HYCPK27692	HY-111538	MAGL-IN-1	xx	369.43	Free Base	C22H24FNO3	DMSO : 62.5 mg/mL (169.18 mM; Need ultrasonic)	DMSO Solution	95972	10mM * 30uL	https://www.medchemexpress.com/MAGL-IN-1.html	Cancer	No Development Reported	MCE	HYCPK27692
KY19382	MCE27692I20		101.229	138	6192	6054	2226664-93-1	GSK-3; Wnt; β-catenin	PI3K/Akt/mTOR; Stem Cell/Wnt	KY19382 is a potent and orally active dual inhibitor of CXXC5-DVL and GSK3β, with IC50s of 19 and 10 nM, respectively. KY19382 activates Wnt/β-catenin signaling through inhibitory effects on both CXXC5-DVL interaction and GSK3β activity. KY19382 can be used for the research of high fat diet (HFD) induced metabolic diseases[1][2].	27692	I20	27692I20	MedChemExpress	10mM	SM1	220714	MCE27692	9	20	220714017HYCPK27692a-2	HYCPK27692	HY-131447	KY19382	A3051	360.19	Free Base	C17H11Cl2N3O2	DMSO : 5 mg/mL (13.88 mM; Need ultrasonic)	DMSO Solution	97647	10mM * 30uL	https://www.medchemexpress.com/ky19382.html	Metabolic Disease	No Development Reported	MCE	HYCPK27692
Idarubicin (hydrochloride)	MCE27693J05		74.8199	1722	7545	5823	57852-57-0	Antibiotic; Autophagy; Bacterial; Fungal; Topoisomerase	Anti-infection; Autophagy; Cell Cycle/DNA Damage	Idarubicin hydrochloride is an anthracycline antileukemic drug. It inhibits the topoisomerase II interfering with the replication of DNA and RNA transcription. Idarubicin hydrochloride inhibits the growth of bacteria and yeasts.	27693	J05	27693J05	MedChemExpress	10mM	SM1	220714	MCE27693	10	5	220714019HYCPK27693a-2	HYCPK27693	HY-17381	Idarubicin (hydrochloride)	4-Demethoxydaunorubicin hydrochloride	533.95	Hydrochloride	C26H28ClNO9	DMSO : 83.33 mg/mL (156.06 mM; Need ultrasonic); H2O : 6.67 mg/mL (12.49 mM; Need ultrasonic)	DMSO Solution	79198	10mM * 30uL	https://www.medchemexpress.com/Idarubicin-hydrochloride.html	Cancer; Infection	Launched	MCE	HYCPK27693
Phenazine (methylsulfate)	MCE27694B15		78.9166	1419	3897	2478	299-11-6	Antibiotic; Apoptosis; Bacterial	Anti-infection; Apoptosis	Phenazine methylsulfate is a free radical generator. Phenazine methylsulfate has been used as an electron transfer reactant in cell viability assays. Phenazine methylsulfate induces ssDNA break formation in the presence of the reducing agent NADPH. Phenazine methylsulfate induces oxidative DNA damage in an alkaline comet assay and apoptosis.	27694	B15	27694B15	MedChemExpress	10mM	SM1	220714	MCE27694	2	15	220714021HYCPK27694a-2	HYCPK27694	HY-W004520	Phenazine (methylsulfate)	5-Methylphenazinium (methylsulfate)	306.34	Methylsulfate	C14H14N2O4S	DMSO : 41.67 mg/mL (136.03 mM; Need ultrasonic); H2O : 62.5 mg/mL (204.02 mM; Need ultrasonic)	DMSO Solution	81448	10mM * 30uL	https://www.medchemexpress.com/phenazine-methylsulfate.html	Others	Launched	MCE	HYCPK27694
Crocin	MCE27694D12		79.3916	1393	3763	2370	42553-65-1	Endogenous Metabolite; Others	Metabolic Enzyme/Protease; Others	Crocin (Crocin I) is a nutraceutical and the main constituent isolated from the stigmas of Crocus sativus with immense pharmacological properties as anti-inflammatory, anticancer, antidepressant and anticonvulsant[1].	27694	D12	27694D12	MedChemExpress	10mM	SM1	220714	MCE27694	4	12	220714021HYCPK27694a-2	HYCPK27694	HY-N0697	Crocin	Crocin I	976.96	Free Base	C44H64O24	DMSO : 125 mg/mL (127.95 mM; Need ultrasonic)	DMSO Solution	64399	10mM * 30uL	https://www.medchemexpress.com/crocin.html	Cancer; Inflammation/Immunology; Neurological Disease	Launched	MCE	HYCPK27694
Benzoyleneurea	MCE27694E20		70.2932	1891	11028	9137	86-96-4	Bacterial	Anti-infection	Benzoyleneurea possesses anti-bacterial activity. Benzoyleneurea scaffold can be used in the synthesis of novel protein geranylgeranyltransferase-I (PGGTase-I) inhibitors[1].	27694	E20	27694E20	MedChemExpress	10mM	SM1	220714	MCE27694	5	20	220714021HYCPK27694a-2	HYCPK27694	HY-N7089	Benzoyleneurea	xx	162.15	Free Base	C8H6N2O2	H2O : < 0.1 mg/mL (insoluble); DMSO : 43.33 mg/mL (267.22 mM; Need ultrasonic)	DMSO Solution	61097	10mM * 30uL	https://www.medchemexpress.com/benzoyleneurea.html	Infection	No Development Reported	MCE	HYCPK27694
CX-6258 (hydrochloride)	MCE27694G09		75.5915	1601	6590	4989	1353859-00-3	Pim	JAK/STAT Signaling	CX-6258 hydrochloride is a potent and kinase selective pan-Pim kinases inhibitor, with IC50s of 5 nM, 25 nM and 16 nM for Pim-1, Pim-2 and Pim-3, respectively[1].	27694	G09	27694G09	MedChemExpress	10mM	SM1	220714	MCE27694	7	9	220714021HYCPK27694a-2	HYCPK27694	HY-18095B	CX-6258 (hydrochloride)	xx	498.40	Hydrochloride	C26H25Cl2N3O3	DMSO : 10 mg/mL (20.06 mM; Need ultrasonic)	DMSO Solution	104616	10mM * 30uL	https://www.medchemexpress.com/cx-6258-hydrochloride.html	Cancer	No Development Reported	MCE	HYCPK27694
Epirubicin (hydrochloride)	MCE27694J10		99.0682	316	1562	1246	56390-09-1	Antibiotic; Apoptosis; DNA/RNA Synthesis; Topoisomerase	Anti-infection; Apoptosis; Cell Cycle/DNA Damage	Epirubicin hydrochloride (4'-Epidoxorubicin hydrochloride), a semisynthetic L-arabino derivative of doxorubicin, has an antineoplastic agent by inhibiting Topoisomerase[1]. Epirubicin hydrochloride inhibits DNA and RNA synthesis. Epirubicin hydrochloride is a Forkhead box protein p3 (Foxp3) inhibitor and inhibits regulatory T cell activity[2].	27694	J10	27694J10	MedChemExpress	10mM	SM1	220714	MCE27694	10	10	220714021HYCPK27694a-2	HYCPK27694	HY-13624A	Epirubicin (hydrochloride)	4'-Epidoxorubicin (hydrochloride)	579.98	Hydrochloride	C27H30ClNO11	DMSO : 25 mg/mL (43.10 mM; Need ultrasonic); H2O : 50 mg/mL (86.21 mM; Need ultrasonic)	DMSO Solution	40461	10mM * 30uL	https://www.medchemexpress.com/epirubicin-hydrochloride.html	Cancer	Launched	MCE	HYCPK27694
Indirubin-3′-oxime	MCE27694M15		72.577	1766	3613	1847	667463-82-3	CDK; GSK-3; JNK	Cell Cycle/DNA Damage; MAPK/ERK Pathway; PI3K/Akt/mTOR; Stem Cell/Wnt	Indirubin-3′-oxime (IDR3O), a synthetic derivative of indirubin, is a potent inhibitor of cyclin-dependent kinases (CDKs) and glycogen synthase kinase 3β (GSK3β). Indirubin-3′-oxime directly inhibits the activity of all three isoforms of JNK (JNK1, JNK2, and JNK3), with IC50s of 0.8 μM, 1.4 μM, and 1.0 μM, respectively. Indirubin-3′-oxime can enhance height growth via activation of Wnt/β-catenin …	27694	M15	27694M15	MedChemExpress	10mM	SM1	220714	MCE27694	13	15	220714021HYCPK27694a-2	HYCPK27694	HY-139254	Indirubin-3′-oxime	IDR3O; I3O	277.28	xx	C16H11N3O2	10 mM in DMSO	DMSO Solution	112715	10mM * 30uL	https://www.medchemexpress.com/indirubin-3-oxime.html	Neurological Disease	No Development Reported	MCE	HYCPK27694
Shikonin	MCE27695C14		76.7601	1574	5185	3611	517-89-5	Chloride Channel; HIV; NF-κB; Pyruvate Kinase; TNF Receptor	Anti-infection; Apoptosis; Membrane Transporter/Ion Channel; Metabolic Enzyme/Protease; NF-κB	Shikonin is a major component of a Chinese herbal medicine named zicao. Shikonin is a potent TMEM16A chloride channel inhibitor with an IC50 of 6.5 μM[1]. Shikonin is a specific pyruvate kinase M2 (PKM2) inhibitor[2] and can also inhibit TNF-α and NF-κB pathway[3]. Shikonin decreases exosome secretion through the inhibition of glycolysis[4]. Shikonin inhibits AIM2 inflammasome activation[7].	27695	C14	27695C14	MedChemExpress	10mM	SM1	220714	MCE27695	3	14	220714022HYCPK27695a-2	HYCPK27695	HY-N0822	Shikonin	C.I. 75535; Isoarnebin 4	288.30	Free Base	C16H16O5	DMSO : 25 mg/mL (86.72 mM; ultrasonic and warming and heat to 60°C)	DMSO Solution	87132	10mM * 30uL	https://www.medchemexpress.com/Shikonin.html	Cancer	No Development Reported	MCE	HYCPK27695
Hydroxocobalamin (acetate)	MCE27695C19		78.9236	1452	6279	4827	22465-48-1	Endogenous Metabolite; Others	Metabolic Enzyme/Protease; Others	Hydroxocobalamin acetate is an injectable naturally occurring form of vitamin B12 with a favorable adverse effect profile, used as a dietary supplement in the treatment of vitamin B12 deficiency including pernicious anemia[1][2].	27695	C19	27695C19	MedChemExpress	10mM	SM1	220714	MCE27695	3	19	220714022HYCPK27695a-2	HYCPK27695	HY-B2209B	Hydroxocobalamin (acetate)	xx	1388.39	Acetate	C64H91CoN13O16P	DMSO : 100 mg/mL (72.03 mM; Need ultrasonic)	DMSO Solution	105011	10mM * 30uL	https://www.medchemexpress.com/hydroxocobalamin-acetate.html	Metabolic Disease	Launched	MCE	HYCPK27695
Pixantrone (dimaleate)	MCE27695E10		84.4919	1138	5199	4061	144675-97-8	Topoisomerase	Cell Cycle/DNA Damage	Pixantrone dimaleate is a topoisomerase II inhibitor and DNA intercalator, with anti-tumor activity.	27695	E10	27695E10	MedChemExpress	10mM	SM1	220714	MCE27695	5	10	220714022HYCPK27695a-2	HYCPK27695	HY-13727A	Pixantrone (dimaleate)	BBR 2778 dimaleate	557.51	Maleate	C25H27N5O10	H2O : 5 mg/mL (8.97 mM; ultrasonic and warming and heat to 80°C); DMSO : 33.33 mg/mL (59.78 mM; Need ultrasonic)	DMSO Solution	86644	10mM * 30uL	https://www.medchemexpress.com/pixantrone-dimaleate.html	Cancer	Launched	MCE	HYCPK27695
Sennoside A	MCE27695H04		73.8872	1736	6178	4442	81-27-6	HIV	Anti-infection	Sennoside A is an anthraquinone glycoside, found in large quantities in leaves and pods of Senna (Cassia angustifolia)[1]. Sennoside A is a HIV-1 inhibitor effective on HIV-1 replication[2].	27695	H04	27695H04	MedChemExpress	10mM	SM1	220714	MCE27695	8	4	220714022HYCPK27695a-2	HYCPK27695	HY-N0365	Sennoside A	xx	862.74	Free Acid	C42H38O20	DMSO : 250 mg/mL (289.77 mM; Need ultrasonic)	DMSO Solution	108670	10mM * 30uL	https://www.medchemexpress.com/sennoside-a.html	Infection	No Development Reported	MCE	HYCPK27695
Tannic acid	MCE27695J07		92.4189	691	14034	13343	1401-55-4	Potassium Channel	Membrane Transporter/Ion Channel	Tannic acid is a novel hERG channel blocker with IC50 of 3.4 μM.	27695	J07	27695J07	MedChemExpress	10mM	SM1	220714	MCE27695	10	7	220714022HYCPK27695a-2	HYCPK27695	HY-B2136	Tannic acid	xx	1701.20	Free Acid	C76H52O46	H2O : ≥ 100 mg/mL (58.78 mM); DMSO : 100 mg/mL (58.78 mM; Need ultrasonic)	DMSO Solution	26432	10mM * 30uL	https://www.medchemexpress.com/Tannic_acid.html	Cancer; Inflammation/Immunology	Launched	MCE	HYCPK27695
Piribedil	MCE27696A17		70.4491	1702	11071	9369	3605-01-4	Adrenergic Receptor; Dopamine Receptor	GPCR/G Protein; Neuronal Signaling	Piribedil is a dopamine D2 receptor (D2R) agonist which also displays antagonist property at hα1A-adrenoceptor (hα1A-AR).	27696	A17	27696A17	MedChemExpress	10mM	SM1	220718	MCE27696	1	17	220718005HYCPK27696a-2	HYCPK27696	HY-12707	Piribedil	xx	298.34	Free Base	C16H18N4O2	DMSO : 33.33 mg/mL (111.72 mM; Need ultrasonic)	DMSO Solution	27071	10mM * 30uL	https://www.medchemexpress.com/Piribedil.html	Neurological Disease; Endocrinology	Launched	MCE	HYCPK27696
Emlenoflast (sodium)	MCE27696E20		80.6711	1207	10425	9218	2380032-29-9	NOD-like Receptor (NLR)	Immunology/Inflammation	Emlenoflast (MCC7840) sodium, a sulfonylurea, is a potent and selective inhibitor of NLRP3 inflammasome, with an IC50 of <100 nM. Emlenoflast sodium can be used for the research of inflammatory diseases[1][2].	27696	E20	27696E20	MedChemExpress	10mM	SM1	220718	MCE27696	5	20	220718005HYCPK27696a-2	HYCPK27696	HY-137245A	Emlenoflast (sodium)	MCC7840 (sodium)	410.47	Sodium	C19H23N4NaO3S	DMSO : 240 mg/mL (584.70 mM; Need ultrasonic)	DMSO Solution	101975	10mM * 30uL	https://www.medchemexpress.com/mcc7840-sodium.html	Inflammation/Immunology	No Development Reported	MCE	HYCPK27696
Methylene blue (trihydrate)	MCE27696F04		83.8926	1051	5019	6070	7220-79-3	Guanylate Cyclase; Monoamine Oxidase; NO Synthase; Parasite	Anti-infection; GPCR/G Protein; Immunology/Inflammation; Neuronal Signaling	Methylene blue trihydrate (C.I. Basic Blue 9 trihydrate) is a guanylyl cyclase (sGC), monoamine oxidase A (MAO-A) and NO synthase (NOS) inhibitor. Methylene blue trihydrate is a vasopressor and is often used as a dye in several medical procedures. Methylene blue trihydrate has antinociception, antimalarial, antidepressant and anxiolytic activity effects. Methylene Blue trihydrate has the potentia…	27696	F04	27696F04	MedChemExpress	10mM	SM1	220718	MCE27696	6	4	220718005HYCPK27696a-2	HYCPK27696	HY-B1359	Methylene blue (trihydrate)	C.I. Basic Blue 9 trihydrate	373.90	hydrate	C16H24ClN3O3S	DMSO : 100 mg/mL (267.45 mM; Need ultrasonic)	DMSO Solution	63900	10mM * 30uL	https://www.medchemexpress.com/methylene-blue-trihydrate.html	Cancer; Infection; Neurological Disease	Launched	MCE	HYCPK27696
Antibacterial agent 18	MCE27696F14		80.2581	1227	13337	12110	1239602-35-7	Bacterial	Anti-infection	Antibacterial agent 18 is a multi-arm AIE molecule extracted from patent CN110123801A, compound 23. Antibacterial agent 18 can be used for resisting Gram-positive and Gram-negative bacteria. Antibacterial agent 18 can be conjugated in the cell wall of rigid arm configuration insertion bacterium, and block cell wall turns sugar and turns peptide process, to inhibit or kill bacterium[1].	27696	F14	27696F14	MedChemExpress	10mM	SM1	220718	MCE27696	6	14	220718005HYCPK27696a-2	HYCPK27696	HY-W074648	Antibacterial agent 18	xx	605.63	xx	C39H27NO6	10 mM in DMSO	DMSO Solution	115874	10mM * 30uL	https://www.medchemexpress.com/antibacterial-agent-18.html	Infection	No Development Reported	MCE	HYCPK27696
Hydroxocobalamin (monohydrochloride)	MCE27696F17		101.9	179	5042	5221	59461-30-2	Endogenous Metabolite; Others	Metabolic Enzyme/Protease; Others	Hydroxocobalamin monohydrochloride (Vitamin B12a monohydrochloride) is an injectable naturally occurring form of vitamin B12 with a favorable adverse effect profile, used as a dietary supplement in the treatment of vitamin B12 deficiency including pernicious anemia[1][2].	27696	F17	27696F17	MedChemExpress	10mM	SM1	220718	MCE27696	6	17	220718005HYCPK27696a-2	HYCPK27696	HY-B2209A	Hydroxocobalamin (monohydrochloride)	Vitamin B12a (monohydrochloride)	1382.82	Hydrochloride	C62H90ClCoN13O15P	H2O : 25 mg/mL (18.08 mM; Need ultrasonic); DMSO : 100 mg/mL (72.32 mM; Need ultrasonic)	DMSO Solution	46160	10mM * 30uL	https://www.medchemexpress.com/Hydroxocobalamin_hydrochloride.html	Metabolic Disease	Launched	MCE	HYCPK27696
Entacapone	MCE27696M12		74.7858	1492	9186	7694	130929-57-6	COMT	Metabolic Enzyme/Protease; Neuronal Signaling	Entacapone is a potent, reversible, peripherally acting and orally active catechol-O-methyltransferase (COMT) inhibitor. Entacapone inhibits COMT from rat brain, erythrocytes and liver with IC50 values of 10 nM, 20 nM, and 160 nM, respectively. Entacapone is selective for COMT over other catecholamine metabolizing enzymes, including MAO-A, MAO-B, phenolsulphotransferase M (PST-M) and PST-P (IC50s…	27696	M12	27696M12	MedChemExpress	10mM	SM1	220718	MCE27696	13	12	220718005HYCPK27696a-2	HYCPK27696	HY-14280	Entacapone	xx	305.29	Free Base	C14H15N3O5	H2O : 2 mg/mL (6.55 mM; ultrasonic and adjust pH to 10 with NaOH); DMSO : 33.33 mg/mL (109.17 mM; Need ultrasonic)	DMSO Solution	39919	10mM * 30uL	https://www.medchemexpress.com/entacapone.html	Neurological Disease	Launched	MCE	HYCPK27696
Methyl caffeate	MCE27696M14		77.8627	1343	10819	9476	3843-74-1	Bacterial	Anti-infection	Methyl caffeate, an antimicrobial agent, shows moderate antimicrobial and prominent antimycobacterial activities. Methyl caffeate also exhibits α-glucosidase inhibition activity, oxidative stress inhibiting activity, anti-platelet activity, antiproliferative activity in cervix adenocarcinoma and anticancer activity in lung and leukmia cell lines[1].	27696	M14	27696M14	MedChemExpress	10mM	SM1	220718	MCE27696	13	14	220718005HYCPK27696a-2	HYCPK27696	HY-N6005	Methyl caffeate	xx	194.18	xx	C10H10O4	DMSO : 33.33 mg/mL (171.64 mM; ultrasonic and warming and heat to 60°C)	DMSO Solution	111519	10mM * 30uL	https://www.medchemexpress.com/methyl-caffeate.html	Cancer; Infection	No Development Reported	MCE	HYCPK27696
Toremifene (citrate)	MCE27696P09		77.3877	1366	10809	9443	89778-27-8	Apoptosis; Estrogen Receptor/ERR	Apoptosis; Others	Toremifene citrate (Z-Toremifene citrate) is a second-generation selective estrogen-receptor modulator (SERM) in development for the prevention of osteoporosis. Toremifene citrate also potent inhibits infectious EBOV Zaire and Marburg (MARV) with IC50 of 0.07 μM and 2.6 μM, respectively[1][2].	27696	P09	27696P09	MedChemExpress	10mM	SM1	220718	MCE27696	16	9	220718005HYCPK27696a-2	HYCPK27696	HY-B0005	Toremifene (citrate)	Z-Toremifene (citrate); NK 622; FC-1157a	598.08	Citrate	C32H36ClNO8	H2O : < 0.1 mg/mL (insoluble); DMSO : ≥ 100 mg/mL (167.20 mM)	DMSO Solution	16814	10mM * 30uL	https://www.medchemexpress.com/toremifene-citrate.html	Cancer; Infection	Launched	MCE	HYCPK27696
Rifapentine	MCE27697D03		87.6224	1003	6397	7400	61379-65-5	Antibiotic; Bacterial	Anti-infection	Rifapentine (DL 473) is an antibiotic compound used in the treatment of tuberculosis. Target: Antibacterial Rifapentine inhibits DNA-dependent RNA polymerase activity in susceptible cells. Specifically, it interacts with bacterial RNA polymerase but does not inhibit the mammalian enzyme. A review of alternative regimens for prevention of active tuberculosis in HIV-negative individuals with latent…	27697	D03	27697D03	MedChemExpress	10mM	SM1	220718	MCE27697	4	3	220718007HYCPK27697a-2	HYCPK27697	HY-B0269	Rifapentine	DL 473; Cyclopentylrifampicin	877.03	Free Base	C47H64N4O12	DMSO : ≥ 50 mg/mL (57.01 mM); H2O : < 0.1 mg/mL (insoluble)	DMSO Solution	16323	10mM * 30uL	https://www.medchemexpress.com/rifapentine.html	Infection	Launched	MCE	HYCPK27697
THZ-P1-2	MCE27697E05		94.2865	656	4650	5306	2058075-45-7	Autophagy	Autophagy	THZ-P1-2 is a first-in-class and selective PI5P4K inhibitor, with an IC50 of 190 nM for PI5P4Kα. THZ-P1-2 covalently targets cysteines on a disordered loop in PI5P4Kα/β/γ. THZ-P1-2 causes autophagy disruption and upregulates TFEB signaling. THZ-P1-2 displays anticancer activity in leukemia cell lines[1].	27697	E05	27697E05	MedChemExpress	10mM	SM1	220718	MCE27697	5	5	220718007HYCPK27697a-2	HYCPK27697	HY-136351	THZ-P1-2	xx	531.61	xx	C31H29N7O2	DMSO : ≥ 250 mg/mL (470.27 mM)	DMSO Solution	89538	10mM * 30uL	https://www.medchemexpress.com/thz-p1-2.html	Cancer	No Development Reported	MCE	HYCPK27697
Bepotastine (besilate)	MCE27697E20		70.3956	1900	10662	8762	190786-44-8	Histamine Receptor	GPCR/G Protein; Immunology/Inflammation; Neuronal Signaling	Bepotastine besilate is a selective and orally active second-generation histamine H1 receptor antagonist. Bepotastine besilate has the potential for allergic rhinitis, allergic conjunctivitis and urticaria/pruritus research[1][2].	27697	E20	27697E20	MedChemExpress	10mM	SM1	220718	MCE27697	5	20	220718007HYCPK27697a-2	HYCPK27697	HY-A0015	Bepotastine (besilate)	xx	547.06	Benzenesulfonate	C27H31ClN2O6S	DMSO : ≥ 100 mg/mL (182.80 mM)	DMSO Solution	05659	10mM * 30uL	https://www.medchemexpress.com/Bepotastine-Beslilate.html	Inflammation/Immunology; Endocrinology	Launched	MCE	HYCPK27697
Rifampicin	MCE27697I09		101.738	268	2480	2212	13292-46-1	Antibiotic; Bacterial; Influenza Virus	Anti-infection	Rifampicin is a potent and broad spectrum antibiotic against bacterial pathogens. Rifampicin has anti-influenza virus activities.	27697	I09	27697I09	MedChemExpress	10mM	SM1	220718	MCE27697	9	9	220718007HYCPK27697a-2	HYCPK27697	HY-B0272	Rifampicin	Rifampin; Rifamycin AMP	822.94	Free Base	C43H58N4O12	H2O : 1 mg/mL (1.22 mM; ultrasonic and heat to 60°C); DMSO : 50 mg/mL (60.76 mM; Need ultrasonic)	DMSO Solution	37144	10mM * 30uL	https://www.medchemexpress.com/rifampicin.html	Infection	Launched	MCE	HYCPK27697
Fusidic acid (sodium salt)	MCE27697M14		75.4657	1636	10935	9299	751-94-0	Antibiotic; Bacterial	Anti-infection	Fusidic acid sodium salt (Sodium fusidate), a bacteriostatic antibiotic produced from the Fusidium coccineum fungus, belongs to the class of steroids. Fusidic acid sodium salt has no corticosteroid effects. Fusidic acid sodium salt inhibits the growth of bacteria by preventing the release of translation elongation factor G (EF-G) from the ribosome[1][2].	27697	M14	27697M14	MedChemExpress	10mM	SM1	220718	MCE27697	13	14	220718007HYCPK27697a-2	HYCPK27697	HY-B1350A	Fusidic acid (sodium salt)	Sodium fusidate; SQ-16360	538.69	Sodium	C31H47NaO6	H2O : ≥ 100 mg/mL (185.64 mM); DMSO : ≥ 100 mg/mL (185.64 mM)	DMSO Solution	16991	10mM * 30uL	https://www.medchemexpress.com/Fusidic-acid-sodium-salt.html	Infection	Launched	MCE	HYCPK27697
N-​Feruloyloctopamine	MCE27697P06		70.0499	1918	11012	9094	66648-44-0	Akt; p38 MAPK	MAPK/ERK Pathway; PI3K/Akt/mTOR	N-Feruloyloctopamine is an antioxidant constituent. N-Feruloyloctopamine significantly decreases the?phosphorylation?levels of Akt and p38?MAPK[1].	27697	P06	27697P06	MedChemExpress	10mM	SM1	220718	MCE27697	16	6	220718007HYCPK27697a-2	HYCPK27697	HY-N2232	N-​Feruloyloctopamine	xx	329.35	xx	C18H19NO5	DMSO : 100 mg/mL (303.63 mM; Need ultrasonic)	DMSO Solution	85800	10mM * 30uL	https://www.medchemexpress.com/n-feruloyloctopamine.html	Cancer	No Development Reported	MCE	HYCPK27697
Omarigliptin	MCE27697P09		73.622	1732	10870	9138	1226781-44-7	Dipeptidyl Peptidase	Metabolic Enzyme/Protease	Omarigliptin(MK-3102) is a potent, selective and long-acting DPP-4 inhibitor with IC50 of 1.6 nM; highly selective over all proteases tested (IC50 > 67 μM). IC50 value: 1.6 nM [1] Target: DPP-4 inhibitor in vitro: Omarigliptin has weak ion channel activity (IC50 > 30 μM at IKr, Cav1.2, and Nav1.5). An expansive selectivity counterscreen (168 radioligand binding or enzymatic assays) was carried ou…	27697	P09	27697P09	MedChemExpress	10mM	SM1	220718	MCE27697	16	9	220718007HYCPK27697a-2	HYCPK27697	HY-15981	Omarigliptin	MK-3102	398.43	Free Base	C17H20F2N4O3S	DMSO : 50 mg/mL (125.49 mM; Need ultrasonic)	DMSO Solution	16548	10mM * 30uL	https://www.medchemexpress.com/Omarigliptin.html	Metabolic Disease	Launched	MCE	HYCPK27697
BIIL-260 (hydrochloride)	MCE27697P14		102.737	216	4407	4623	192581-24-1	Leukotriene Receptor	GPCR/G Protein	BIIL-260 hydrochloride is a potent and long-acting orally active leukotriene B(4) receptor LTB4 antagonist, with anti-inflammatory activity. BIIL-260 hydrochloride interacts with the LTB4 receptor in a saturable, reversible, and competitive manner, has high affinity to the LTB4 receptor on isolated human neutrophil cell membranes with Ki values of 1.7 nM[1].	27697	P14	27697P14	MedChemExpress	10mM	SM1	220718	MCE27697	16	14	220718007HYCPK27697a-2	HYCPK27697	HY-114641A	BIIL-260 (hydrochloride)	xx	503.03	Hydrochloride	C30H31ClN2O3	10 mM in DMSO	DMSO Solution	126664	10mM * 30uL	https://www.medchemexpress.com/biil-260-hydrochloride.html	Inflammation/Immunology	No Development Reported	MCE	HYCPK27697
Bis-propargyl-PEG3	MCE27698E20		78.8376	1567	10775	9208	126422-58-0	PROTAC Linkers	PROTAC	Bis-propargyl-PEG3 is a PEG-based PROTAC linker used in the synthesis of PROTACs. Bis-propargyl-PEG3 is used in the synthesis of zinc-dipicolylamine (ZnDPA) complexes with antiplasmodial activity[1] [2].	27698	E20	27698E20	MedChemExpress	10mM	SM1	220718	MCE27698	5	20	220718009HYCPK27698a-2	HYCPK27698	HY-133192	Bis-propargyl-PEG3	xx	226.27	xx	C12H18O4	DMSO : 100 mg/mL (441.95 mM; Need ultrasonic)	DMSO Solution	109256	10mM * 30uL	https://www.medchemexpress.com/bis-propargyl-peg3.html	Cancer; Infection	No Development Reported	MCE	HYCPK27698
Hemin	MCE27698L13		76.0753	1716	6122	4406	16009-13-5	Autophagy; Ferroptosis; Mitophagy	Apoptosis; Autophagy	Hemin is an iron-containing porphyrin. Hemin is an Heme oxygenase (HO)-1 inducer.	27698	L13	27698L13	MedChemExpress	10mM	SM1	220718	MCE27698	12	13	220718009HYCPK27698a-2	HYCPK27698	HY-19424	Hemin	Hemin chloride	651.94	Free Acid	C34H32ClFeN4O4	DMSO : 17.33 mg/mL (26.58 mM; Need ultrasonic); NH4OH : 2.5 mg/mL (3.83 mM; ultrasonic and adjust pH to 11 with H2O); H2O : 0.1 mg/mL (0.15 mM; Need ultrasonic)	DMSO Solution	82038	10mM * 30uL	https://www.medchemexpress.com/Hemin.html	Cardiovascular Disease	Launched	MCE	HYCPK27698
(S,R,S)-AHPC-C2-NH2 (dihydrochloride)	MCE27698M14		76.891	1672	10911	9239	2341796-73-2	E3 Ligase Ligand-Linker Conjugates	PROTAC	(S,R,S)-AHPC-C2-NH2 dihydrochloride incorporates a VHL ligand for the E3 ubiquitin ligase, and a PROTAC linker. (S,R,S)-AHPC-OH can be used in the synthesis of a series of PROTACs[1].	27698	M14	27698M14	MedChemExpress	10mM	SM1	220718	MCE27698	13	14	220718009HYCPK27698a-2	HYCPK27698	HY-136163	(S,R,S)-AHPC-C2-NH2 (dihydrochloride)	xx	574.56	Hydrochloride	C25H37Cl2N5O4S	DMSO : 250 mg/mL (435.12 mM; Need ultrasonic)	DMSO Solution	113757	10mM * 30uL	https://www.medchemexpress.com/s-r-s-ahpc-c2-nh2-dihydrochloride.html	Cancer	No Development Reported	MCE	HYCPK27698
I-OMe-Tyrphostin AG 538	MCE27698M19		98.3407	515	2174	1659	1094048-77-7	IGF-1R	Protein Tyrosine Kinase/RTK	I-OMe-Tyrphostin AG 538 (I-OMe-AG 538) is a specific inhibitor of IGF-1R (insulin-like growth factor-1 receptor tyrosine kinase). I-OMe-Tyrphostin AG 538 inhibits IGF-1R-mediated signaling and is preferentially cytotoxic to nutrient-deprived PANC1 cells.?I-OMe-Tyrphostin AG 538 is an ATP-competitive inhibitor of phosphatidylinositol-5-phosphate 4-kinase α (PI5P4Kα), with an IC50?of 1 μM[1].	27698	M19	27698M19	MedChemExpress	10mM	SM1	220718	MCE27698	13	19	220718009HYCPK27698a-2	HYCPK27698	HY-135680	I-OMe-Tyrphostin AG 538	I-OMe-AG 538	437.19	xx	C17H12INO5	DMSO : 50 mg/mL (114.37 mM; Need ultrasonic)	DMSO Solution	125439	10mM * 30uL	https://www.medchemexpress.com/i-ome-tyrphostin-ag-538.html	Cancer; Metabolic Disease	No Development Reported	MCE	HYCPK27698
HM43239	MCE27698N21		92.4268	834	5633	6467	2294874-49-8	Apoptosis; FLT3	Apoptosis; Protein Tyrosine Kinase/RTK	HM43239 is an orally active and selective FLT3 inhibitor with IC50s of 1.1 nM, 1.8 nM and 1.0 nM for FLT3 WT, FLT3 internal tandem duplication (ITD) and FLT3 D835Y kinases, respectively. HM43239 inhibits the kinase activity of FLT3 as a reversible type I inhibitor and modulates p-STAT5, p-ERK, SYK, JAK1/2, and TAK1. HM43239 inhibits the proliferation and induces the apoptosis of leukemic cells[1]…	27698	N21	27698N21	MedChemExpress	10mM	SM1	220718	MCE27698	14	21	220718009HYCPK27698a-2	HYCPK27698	HY-145015	HM43239	xx	501.07	xx	C29H33ClN6	DMSO : 125 mg/mL (249.47 mM; Need ultrasonic)	DMSO Solution	124047	10mM * 30uL	https://www.medchemexpress.com/hm43239.html	Cancer	No Development Reported	MCE	HYCPK27698
Bromo-PEG1-C2-Boc	MCE27698P06		72.9978	1882	11036	9154	1393330-36-3	PROTAC Linkers	PROTAC	Bromo-PEG1-C2-Boc is a PEG-based PROTAC linker that can be used in the synthesis of PROTACs[1].	27698	P06	27698P06	MedChemExpress	10mM	SM1	220718	MCE27698	16	6	220718009HYCPK27698a-2	HYCPK27698	HY-141364	Bromo-PEG1-C2-Boc	xx	253.13	xx	C9H17BrO3	10 mM in DMSO	DMSO Solution	115763	10mM * 30uL	https://www.medchemexpress.com/bromo-peg1-c2-boc.html	Cancer	No Development Reported	MCE	HYCPK27698
N-(Amino-PEG2)-N-bis(PEG3-azide)	MCE27698P09		72.3118	1919	10955	9036	xx	PROTAC Linkers	PROTAC	N-(Amino-PEG2)-N-bis(PEG3-azide) is a PEG-based PROTAC linker that can be used in the synthesis of PROTACs[1].	27698	P09	27698P09	MedChemExpress	10mM	SM1	220718	MCE27698	16	9	220718009HYCPK27698a-2	HYCPK27698	HY-140087	N-(Amino-PEG2)-N-bis(PEG3-azide)	xx	550.65	xx	C22H46N8O8	DMSO : 100 mg/mL (181.60 mM; Need ultrasonic)	DMSO Solution	116206	10mM * 30uL	https://www.medchemexpress.com/n-amino-peg2-n-bis-peg3-azide.html	Cancer	No Development Reported	MCE	HYCPK27698
Biochanin A	MCE27699E20		79.7493	1536	10481	8945	491-80-5	Autophagy; Endogenous Metabolite; FAAH	Autophagy; Metabolic Enzyme/Protease; Neuronal Signaling	Biochanin A is a naturally occurring fatty acid amide hydrolase (FAAH) inhibitor, which inhibits FAAH with IC50s of 1.8, 1.4 and 2.4 μM for mouse, rat, and human FAAH, respectively.	27699	E20	27699E20	MedChemExpress	10mM	SM1	220718	MCE27699	5	20	220718011HYCPK27699a-2	HYCPK27699	HY-14595	Biochanin A	4-Methylgenistein; Olmelin	284.26	Free Base	C16H12O5	DMSO : ≥ 50 mg/mL (175.90 mM)	DMSO Solution	13480	10mM * 30uL	https://www.medchemexpress.com/Biochanin-A.html	Neurological Disease; Cancer	No Development Reported	MCE	HYCPK27699
Edoxaban (tosylate monohydrate)	MCE27699M14		77.5766	1653	10820	9167	1229194-11-9	Factor Xa; Thrombin	Metabolic Enzyme/Protease	Edoxaban tosylate monohydrate (DU-176b monohydrate) is a selective, potent and orally active factor Xa (FXa) inhibitor with Kis of 0.561 nM and 2.98 nM for free FXa and prothrombinase, respectively. Edoxaban tosylate monohydrate is an anticoagulant agent and can be used for stroke prevention. Edoxaban tosylate monohydrate is a also weak inhibitor of thrombin and factor IXaβ (FIXa), with Kis of 6.…	27699	M14	27699M14	MedChemExpress	10mM	SM1	220718	MCE27699	13	14	220718011HYCPK27699a-2	HYCPK27699	HY-10264B	Edoxaban (tosylate monohydrate)	DU-176b (monohydrate)	738.27	Tosylate	C31H40ClN7O8S2	H2O : 1 mg/mL (1.35 mM; Need ultrasonic); DMSO : 50 mg/mL (67.73 mM; Need ultrasonic)	DMSO Solution	15962	10mM * 30uL	https://www.medchemexpress.com/Edoxaban-tosylate-monohydrate.html	Cardiovascular Disease	Launched	MCE	HYCPK27699
Eltrombopag	MCE27699O17		82.4977	1388	5130	3742	496775-61-2	Bacterial; Thrombopoietin Receptor	Anti-infection; Immunology/Inflammation	Eltrombopag (SB-497115) is a thrombopoietin (TPO) receptor agonist developed for certain conditions that lead to thrombocytopenia.	27699	O17	27699O17	MedChemExpress	10mM	SM1	220718	MCE27699	15	17	220718011HYCPK27699a-2	HYCPK27699	HY-15306	Eltrombopag	SB-497115	442.47	Free Acid	C25H22N4O4	H2O : < 0.1 mg/mL (insoluble); DMSO : 8.33 mg/mL (18.83 mM; Need ultrasonic)	DMSO Solution	57763	10mM * 30uL	https://www.medchemexpress.com/Eltrombopag.html	Cardiovascular Disease; Cancer	Launched	MCE	HYCPK27699
Cetylpyridinium (chloride)	MCE27699P09		75.4968	1765	10000	8235	123-03-5	Bacterial; HBV	Anti-infection	Cetylpyridinium chloride, a cationic quaternary ammonium compound, is an anti-bacterial agent with broad-spectrum activity. Cetylpyridinium chloride is an effective anti-HBV capsid assembly inhibitor with an IC50 of 2.5 μM. Cetylpyridinium chloride is used in pesticides and various types of mouthwashes, and other personal care products[1][2].	27699	P09	27699P09	MedChemExpress	10mM	SM1	220718	MCE27699	16	9	220718011HYCPK27699a-2	HYCPK27699	HY-B1464	Cetylpyridinium (chloride)	xx	339.99	Chloride	C21H38ClN	DMSO : 100 mg/mL (294.13 mM; Need ultrasonic); H2O : 100 mg/mL (294.13 mM; Need ultrasonic)	DMSO Solution	112701	10mM * 30uL	https://www.medchemexpress.com/cetylpyridinium-chloride.html	Infection; Inflammation/Immunology	Launched	MCE	HYCPK27699
SMER3	MCE27700B07		102.522	157	13771	13928	67200-34-4	E1/E2/E3 Enzyme	Metabolic Enzyme/Protease	SMER3, a Rapamycin enhancer, is a selective Skp1-Cullin-F-box (SCF)Met30 ubiquitin ligase inhibitor. SMER3 enhances Rapamycin's growth inhibitory effect by inhibition of SCFMet30[1].	27700	B07	27700B07	MedChemExpress	10mM	SM1	220718	MCE27700	2	7	220718013HYCPK27700a-2	HYCPK27700	HY-10949	SMER3	xx	224.18	xx	C11H4N4O2	DMSO : 12.5 mg/mL (55.76 mM; Need ultrasonic)	DMSO Solution	101584	10mM * 30uL	https://www.medchemexpress.com/smer3.html	Cancer	No Development Reported	MCE	HYCPK27700
CM-579 trihydrochloride	MCE27700B10		80.8725	1286	7504	6218	xx	DNA Methyltransferase; Histone Methyltransferase	Epigenetics	CM-579 trihydrochloride is a first-in-class reversible, dual inhibitor of G9a and DNMT, with IC50 values of 16 nM, 32 nM for G9a and DNMT, respectively. Has potent in vitro cellular activity in a wide range of cancer cells[1].	27700	B10	27700B10	MedChemExpress	10mM	SM1	220718	MCE27700	2	10	220718013HYCPK27700a-2	HYCPK27700	HY-117421A	CM-579 trihydrochloride	xx	602.04	Hydrochloride	C29H43Cl3N4O3	H2O : 37.5 mg/mL (62.29 mM; Need ultrasonic); DMSO : 33.33 mg/mL (55.36 mM; Need ultrasonic)	DMSO Solution	102505	10mM * 30uL	https://www.medchemexpress.com/CM-579_hydrochloride.html	Cancer	No Development Reported	MCE	HYCPK27700
5-Iminodaunorubicin (hydrochloride)	MCE27700B18		90.1534	802	3727	2925	67324-99-6	DNA/RNA Synthesis	Cell Cycle/DNA Damage	5-Iminodaunorubicin hydrochloride is a quinone-modified anthracycline that retains antitumor activity[1]. 5-Iminodaunorubicin hydrochloride produces protein-concealed DNA strand breaks in cancer cells[2].	27700	B18	27700B18	MedChemExpress	10mM	SM1	220718	MCE27700	2	18	220718013HYCPK27700a-2	HYCPK27700	HY-138645A	5-Iminodaunorubicin (hydrochloride)	xx	563.00	Hydrochloride	C27H31ClN2O9	DMSO : 230 mg/mL (408.53 mM; Need ultrasonic); H2O : 8.33 mg/mL (14.80 mM; Need ultrasonic)	DMSO Solution	104740	10mM * 30uL	https://www.medchemexpress.com/5-iminodaunorubicin-hydrochloride.html	Cancer	No Development Reported	MCE	HYCPK27700
Semapimod (tetrahydrochloride)	MCE27700E19		101.371	217	3850	4067	164301-51-3	Interleukin Related; p38 MAPK; TNF Receptor	Apoptosis; Immunology/Inflammation; MAPK/ERK Pathway	Semapimod tetrahydrochloride (CNI-1493), an inhibitor of proinflammatory cytokine production, can inhibit TNF-α, IL-1β, and IL-6. Semapimod tetrahydrochloride inhibits TLR4 signaling (IC50≈0.3 μM). Semapimod tetrahydrochloride inhibits p38 MAPK and nitric oxide production in macrophages. Semapimod tetrahydrochloride has potential in a variety of inflammatory and autoimmune disorders[1][2][3].	27700	E19	27700E19	MedChemExpress	10mM	SM1	220718	MCE27700	5	19	220718013HYCPK27700a-2	HYCPK27700	HY-15509A	Semapimod (tetrahydrochloride)	CNI-1493; CPSI-2364 (tetrahydrochloride)	890.74	Hydrochloride	C34H56Cl4N18O2	H2O : 14.29 mg/mL (16.04 mM; Need ultrasonic)	DMSO Solution	107128	10mM * 30uL	https://www.medchemexpress.com/semapimod-tetrahydrochloride.html	Inflammation/Immunology	Phase 2	MCE	HYCPK27700
Glabrol	MCE27700E20		73.7009	1660	10496	8836	59870-65-4	Acyltransferase	Metabolic Enzyme/Protease	Glabrol (Compound 1), One isoprenyl flavonoid was isolated from ethanol extract of licorice roots, is a potent and non-competitive Acyl-coenzyme A: cholesterol acyltransferase (ACAT) inhibitor with an IC50 value of 24.6 μM for rat liver microsomal ACAT activity[1].	27700	E20	27700E20	MedChemExpress	10mM	SM1	220718	MCE27700	5	20	220718013HYCPK27700a-2	HYCPK27700	HY-N4193	Glabrol	xx	392.49	Free Base	C25H28O4	DMSO : 100 mg/mL (254.78 mM; Need ultrasonic)	DMSO Solution	109315	10mM * 30uL	https://www.medchemexpress.com/glabrol.html	Cardiovascular Disease	No Development Reported	MCE	HYCPK27700
Eltrombopag (Olamine)	MCE27700J13		92.4928	680	4363	3683	496775-62-3	Bacterial; Thrombopoietin Receptor	Anti-infection; Immunology/Inflammation	Eltrombopag Olamine (Eltrombopag diethanolamine salt) is a thrombopoietin-receptor agonist used to treat low blood platelet counts with chronic immune thrombocytopenia.	27700	J13	27700J13	MedChemExpress	10mM	SM1	220718	MCE27700	10	13	220718013HYCPK27700a-2	HYCPK27700	HY-15306A	Eltrombopag (Olamine)	Eltrombopag diethanolamine salt; SB-497115GR	564.63	Olamine	C29H36N6O6	DMSO : ≥ 50 mg/mL (88.55 mM)	DMSO Solution	26013	10mM * 30uL	https://www.medchemexpress.com/Eltrombopag-Olamine.html	Cardiovascular Disease; Cancer	Launched	MCE	HYCPK27700
M2N12	MCE27700K15		96.6155	465	7324	6859	2376577-06-7	CDK	Cell Cycle/DNA Damage	M2N12 is a potent and highly selective cell division cycle 25C protein phosphatase (Cdc25C) inhibitor with an IC50 value of 0.09 ?μM. M2N12 also has promising activity against Cdc25A and Cdc25B with IC50 values of ?0.53? μM and 1.39 μM, respectively. M2N12 has anti-tumor activity and can be used for cancer research[1].	27700	K15	27700K15	MedChemExpress	10mM	SM1	220718	MCE27700	11	15	220718013HYCPK27700a-2	HYCPK27700	HY-128769	M2N12	xx	393.83	Free Base	C20H16ClN5O2	DMSO : 11.11 mg/mL (28.21 mM; ultrasonic and warming and heat to 67°C)	DMSO Solution	99847	10mM * 30uL	https://www.medchemexpress.com/m2n12.html	Cancer	No Development Reported	MCE	HYCPK27700
Norbergenin	MCE27700M14		70.4602	1829	10928	9099	79595-97-4	Reactive Oxygen Species	Immunology/Inflammation; Metabolic Enzyme/Protease; NF-κB	Norbergenin, the O-demethyl derivative of bergenin, shows moderate antioxidant activity (IC50 13 μM in DPPH radical scavenging; 32 μM in superoxide anion scavenging)[1].	27700	M14	27700M14	MedChemExpress	10mM	SM1	220718	MCE27700	13	14	220718013HYCPK27700a-2	HYCPK27700	HY-N9447	Norbergenin	xx	314.24	xx	C13H14O9	DMSO : 125 mg/mL (397.79 mM; Need ultrasonic)	DMSO Solution	104828	10mM * 30uL	https://www.medchemexpress.com/norbergenin.html	Neurological Disease	No Development Reported	MCE	HYCPK27700
Dutasteride	MCE27701E03		76.4716	1706	10760	9054	164656-23-9	5 alpha Reductase; Apoptosis	Apoptosis; Metabolic Enzyme/Protease	Dutasteride (GG745) is a potent inhibitor of both 5α-reductase isozymes. Dutasteride may possess off-target effects on the androgen receptor (AR) due to its structural similarity to DHT[1].	27701	E03	27701E03	MedChemExpress	10mM	SM1	220718	MCE27701	5	3	220718015HYCPK27701a-2	HYCPK27701	HY-13613	Dutasteride	GG 745; GI 198745	528.53	Free Base	C27H30F6N2O2	DMSO : 33.33 mg/mL (63.06 mM; Need ultrasonic)	DMSO Solution	15665	10mM * 30uL	https://www.medchemexpress.com/Dutasteride.html	Cancer	Launched	MCE	HYCPK27701
Sulfogaiacol	MCE27701E20		81.4409	1427	10335	8908	1321-14-8	Bacterial	Anti-infection	Sulfogaiacol is a antitussive agent. Sulfogaiacol is used for acute respiratory tract infections, cough and other conditions.	27701	E20	27701E20	MedChemExpress	10mM	SM1	220718	MCE27701	5	20	220718015HYCPK27701a-2	HYCPK27701	HY-B2115	Sulfogaiacol	xx	242.29	Potassium	C7H7O5S.K	H2O : ≥ 50 mg/mL (206.36 mM); DMSO : 50 mg/mL (206.36 mM; Need ultrasonic)	DMSO Solution	26079	10mM * 30uL	https://www.medchemexpress.com/Sulfogaiacol.html	Inflammation/Immunology	Launched	MCE	HYCPK27701
Cetylpyridinium (chloride monohydrate)	MCE27701F11		79.2323	1551	9423	7872	6004-24-6	Bacterial	Anti-infection	Cetylpyridinium chloride monohydrate is a cationic quaternary ammonium compound, used in some types of mouthwashes, toothpastes, throat and nasal sprays, is an antiseptic that kills bacteria and other microorganisms, effective in preventing dental plaque and reducing gingivitis.	27701	F11	27701F11	MedChemExpress	10mM	SM1	220718	MCE27701	6	11	220718015HYCPK27701a-2	HYCPK27701	HY-B1289	Cetylpyridinium (chloride monohydrate)	Hexadecylpyridinium chloride monohydrate	358.00	Chloride	C21H40ClNO	H2O : ≥ 100 mg/mL (279.33 mM); DMSO : 20 mg/mL (55.87 mM; Need ultrasonic)	DMSO Solution	17478	10mM * 30uL	https://www.medchemexpress.com/Cetylpyridinium-chloride-monohydrate.html	Infection	Launched	MCE	HYCPK27701
Indirubin Derivative E804	MCE27701H19		87.7994	1070	2945	1875	854171-35-0	IGF-1R	Protein Tyrosine Kinase/RTK	Indirubin Derivative E804 is a potent inhibitor of Insulin-like Growth Factor 1 Receptor (IGF1R), with an IC50 of 0.65 μM for IGF1R.	27701	H19	27701H19	MedChemExpress	10mM	SM1	220718	MCE27701	8	19	220718015HYCPK27701a-2	HYCPK27701	HY-18785	Indirubin Derivative E804	xx	365.38	Free Base	C20H19N3O4	DMSO : 125 mg/mL (342.11 mM; Need ultrasonic)	DMSO Solution	113835	10mM * 30uL	https://www.medchemexpress.com/Indirubin_Derivative_E804.html	Cancer; Endocrinology	No Development Reported	MCE	HYCPK27701
Methylcobalamin	MCE27701I13		89.4559	977	5117	4140	13422-55-4	Endogenous Metabolite	Metabolic Enzyme/Protease	Methylcobalamin (CH3-B12), a cobalamin, is a form of vitamin B12.	27701	I13	27701I13	MedChemExpress	10mM	SM1	220718	MCE27701	9	13	220718015HYCPK27701a-2	HYCPK27701	HY-B0586	Methylcobalamin	CH3-B12	1344.38	Free Base	C63H91CoN13O14P	DMSO : ≥ 100 mg/mL (74.38 mM); H2O : 5 mg/mL (3.72 mM; Need ultrasonic)	DMSO Solution	13443	10mM * 30uL	https://www.medchemexpress.com/Methylcobalamin.html	Metabolic Disease	Launched	MCE	HYCPK27701
Dihydroisotanshinone I	MCE27701J07		72.3395	1938	13102	11164	20958-18-3	Apoptosis; Ferroptosis; STAT	Apoptosis; JAK/STAT Signaling; Stem Cell/Wnt	Dihydroisotanshinone I, a bioactive compound present in danshen, can inhibit the migration of both androgen-dependent and androgen-independent prostate cancer cells. Dihydroisotanshinone I also induces apoptosis and ferroptosis in these lung cancer cells. Dihydroisotanshinone I also blocks the protein expression of GPX4[1][2].	27701	J07	27701J07	MedChemExpress	10mM	SM1	220718	MCE27701	10	7	220718015HYCPK27701a-2	HYCPK27701	HY-B1919	Dihydroisotanshinone I	xx	278.30	Free Base	C18H14O3	H2O : 1 mg/mL (3.59 mM; ultrasonic and warming and heat to 80°C); DMSO : 3.33 mg/mL (11.97 mM; ultrasonic and warming and heat to 40°C)	DMSO Solution	26621	10mM * 30uL	https://www.medchemexpress.com/Dihydroisotanshinone_I.html	Cancer	No Development Reported	MCE	HYCPK27701
Bifendate	MCE27701M14		74.9755	1790	10866	9076	73536-69-3	HBV	Anti-infection	Bifendate (DDB) is a synthetic intermediate of Schisandrin C with anti-HBV efficacy in research of chronic hepatitis B[1].	27701	M14	27701M14	MedChemExpress	10mM	SM1	220718	MCE27701	13	14	220718015HYCPK27701a-2	HYCPK27701	HY-W018791	Bifendate	DDB	418.35	Free Base	C20H18O10	DMSO : 50 mg/mL (119.52 mM; Need ultrasonic); H2O : 1 mg/mL (2.39 mM; ultrasonic and warming and heat to 80°C)	DMSO Solution	27708	10mM * 30uL	https://www.medchemexpress.com/bifendate.html	Infection	Launched	MCE	HYCPK27701
HS-27	MCE27701O09		82.9905	1340	65158	63818	1562024-11-6	HSP	Cell Cycle/DNA Damage; Metabolic Enzyme/Protease	HS-27, a fluorescently-tethered Hsp90 inhibitor, assays surface Hsp90 expression on intact tissue specimens. HS-27 is made up of the core elements of SNX-5422, an Hsp90 inhibitor, tethered via a PEG linker to a fluorescein derivative (fluorescein isothiocyanate or FITC), that binds to ectopically expressed Hsp90. HS-27 has potential use in a see-and-treat paradigm in breast cancer[1].	27701	O09	27701O09	MedChemExpress	10mM	SM1	220718	MCE27701	15	9	220718015HYCPK27701a-2	HYCPK27701	HY-130851	HS-27	xx	993.13	xx	C52H60N6O12S	DMSO : 125 mg/mL (125.86 mM; Need ultrasonic)	DMSO Solution	101486	10mM * 30uL	https://www.medchemexpress.com/hs-27.html	Cancer	No Development Reported	MCE	HYCPK27701
Tamsulosin	MCE27701P06		74.1384	1837	10771	8934	106133-20-4	Adrenergic Receptor; Endogenous Metabolite	GPCR/G Protein; Metabolic Enzyme/Protease; Neuronal Signaling	Tamsulosin ((R)-(-)-YM12617 free base) is an inhibitor of α1-adrenergic receptor. Tamsulosin is used for the research of prostatic hyperplasia. Tamsulosin attenuates abdominal aortic aneurysm growth in animal models[1].	27701	P06	27701P06	MedChemExpress	10mM	SM1	220718	MCE27701	16	6	220718015HYCPK27701a-2	HYCPK27701	HY-B0661	Tamsulosin	(R)-(-)-YM12617 (free base); LY253351 (free base)	408.51	Free Base	C20H28N2O5S	DMSO : 100 mg/mL (244.79 mM; Need ultrasonic)	DMSO Solution	13388	10mM * 30uL	https://www.medchemexpress.com/Tamsulosin.html	Cancer; Endocrinology; Neurological Disease	Launched	MCE	HYCPK27701
Tegoprazan	MCE27701P09		74.0315	1843	10835	8992	942195-55-3	Proton Pump	Membrane Transporter/Ion Channel	Tegoprazan, a potassium-competitive acid blocker, is a potent, oral active and highly selective inhibitor of gastric H+/K+-ATPase that could control gastric acid secretion and motility, with IC50 values ranging from 0.29-0.52 μM for porcine, canine, and human H+/K+-ATPases in vitro[1].	27701	P09	27701P09	MedChemExpress	10mM	SM1	220718	MCE27701	16	9	220718015HYCPK27701a-2	HYCPK27701	HY-17623	Tegoprazan	xx	387.38	Free Base	C20H19F2N3O3	DMSO : 100 mg/mL (258.14 mM; Need ultrasonic)	DMSO Solution	96372	10mM * 30uL	https://www.medchemexpress.com/Tegoprazan.html	Metabolic Disease	Phase 4	MCE	HYCPK27701
Daunorubicin (hydrochloride)	MCE27701P15		94.9773	667	2189	1522	23541-50-6	ADC Cytotoxin; Antibiotic; Apoptosis; Autophagy; Bacterial; DNA/RNA Synthesis; Topoisomerase	Antibody-drug Conjugate/ADC Related; Anti-infection; Apoptosis; Autophagy; Cell Cycle/DNA Damage	Daunorubicin (Daunomycin) hydrochloride is a topoisomerase II inhibitor with potent antineoplastic activities. Daunorubicin hydrochloride inhibits DNA and RNA synthesis in sensitive and resistant Ehrlich ascites tumor cells.	27701	P15	27701P15	MedChemExpress	10mM	SM1	220718	MCE27701	16	15	220718015HYCPK27701a-2	HYCPK27701	HY-13062	Daunorubicin (hydrochloride)	Daunomycin (hydrochloride); RP 13057 (hydrochloride); Rubidomycin (hydrochloride)	563.98	Hydrochloride	C27H30ClNO10	H2O : ≥ 34 mg/mL (60.29 mM); DMSO : 50 mg/mL (88.66 mM; Need ultrasonic)	DMSO Solution	45907	10mM * 30uL	https://www.medchemexpress.com/Daunorubicin-Hydrochloride.html	Cancer; Infection	Launched	MCE	HYCPK27701
Fenspiride (hydrochloride)	MCE27702E20		70.4519	1963	10514	8551	5053-08-7	Histamine Receptor; Phosphodiesterase (PDE)	GPCR/G Protein; Immunology/Inflammation; Metabolic Enzyme/Protease; Neuronal Signaling	Fenspiride, an orally active non-steroidal antiinflammatory agent, is an antagonist of H1-histamine receptors. Fenspiride inhibites phosphodiesterase 3 (PDE3), phosphodiesterase 4 (PDE4) and phosphodiesterase 5 (PDE5) activities with -log IC50 values of 3.44, 4.16 and approximately 3.8, respectively. Fenspiride can be used for the research of respiratory diseases[1][2][3].	27702	E20	27702E20	MedChemExpress	10mM	SM1	220718	MCE27702	5	20	220718017HYCPK27702a-2	HYCPK27702	HY-A0027	Fenspiride (hydrochloride)	xx	296.79	Hydrochloride	C15H21ClN2O2	H2O : 50 mg/mL (168.47 mM; Need ultrasonic); DMSO : 33.33 mg/mL (112.30 mM; Need ultrasonic)	DMSO Solution	07258	10mM * 30uL	https://www.medchemexpress.com/Fenspiride-Hydrochloride.html	Inflammation/Immunology; Endocrinology	Launched	MCE	HYCPK27702
Sennoside B	MCE27702G05		86.825	1108	4706	3598	128-57-4	PDGFR	Protein Tyrosine Kinase/RTK	Sennoside B is an anthraquinone glycoside, found in large quantities in leaves and pods of Senna (Cassia angustifolia)[1]. Sennoside B can inhibit PDGF-stimulated cell proliferation by binding to PDGF-BB and its receptor and by down-regulating the PDGFR-beta signaling pathway[2].	27702	G05	27702G05	MedChemExpress	10mM	SM1	220718	MCE27702	7	5	220718017HYCPK27702a-2	HYCPK27702	HY-N0366	Sennoside B	xx	862.74	Free Acid	C42H38O20	DMSO : 125 mg/mL (144.89 mM; Need ultrasonic)	DMSO Solution	58814	10mM * 30uL	https://www.medchemexpress.com/sennoside-b.html	Cancer	No Development Reported	MCE	HYCPK27702
Thonzonium (bromide)	MCE27702H18		101.053	365	4603	4968	553-08-2	Bacterial; Proton Pump	Anti-infection; Membrane Transporter/Ion Channel	Thonzonium bromide is an antibacterial agent that is structurally similar to Farnesol (HY-Y0248A). Thonzonium bromide is also a monocationic surface-active agent, which inhibits RANKL-induced osteoclast formation and bone resorption in vitro and prevents LPS-induced bone loss in vivo. Thonzonium bromide inhibits proton transport in a dose-dependent manner (EC50=69 μM)[1][2][3].	27702	H18	27702H18	MedChemExpress	10mM	SM1	220718	MCE27702	8	18	220718017HYCPK27702a-2	HYCPK27702	HY-B1246	Thonzonium (bromide)	xx	591.71	Bromide	C32H55BrN4O	DMSO : ≥ 30 mg/mL (50.70 mM)	DMSO Solution	62988	10mM * 30uL	https://www.medchemexpress.com/Thonzonium-bromide.html	Infection	Launched	MCE	HYCPK27702
Valrubicin	MCE27702I07		76.2543	1660	4201	2541	56124-62-0	Antibiotic; PKC	Anti-infection; Epigenetics; TGF-beta/Smad	Valrubicin is a chemotherapy agent, inhibits TPA- and PDBu-induced PKC activation with IC50s of 0.85 and 1.25 μM, respectively, and has antitumor and antiinflammatory activity.	27702	I07	27702I07	MedChemExpress	10mM	SM1	220718	MCE27702	9	7	220718017HYCPK27702a-2	HYCPK27702	HY-13772	Valrubicin	AD-32	723.64	Free Base	C34H36F3NO13	DMSO : 125 mg/mL (172.74 mM; Need ultrasonic)	DMSO Solution	113794	10mM * 30uL	https://www.medchemexpress.com/Valrubicin.html	Cancer; Inflammation/Immunology	Launched	MCE	HYCPK27702
Nifurtimox	MCE27702M14		72.3669	1863	9756	7893	23256-30-6	Lactate Dehydrogenase; Parasite	Anti-infection; Metabolic Enzyme/Protease	Nifurtimox, an antiprotozoal agent, which is generally used for the treatment of infections with Trypanosoma cruzi, has been used in the therapy of neuroblastoma. Nifurtimox affects enzyme activity of lactate dehydrogenase (LDH).	27702	M14	27702M14	MedChemExpress	10mM	SM1	220718	MCE27702	13	14	220718017HYCPK27702a-2	HYCPK27702	HY-W040073	Nifurtimox	xx	287.30	Free Base	C10H13N3O5S	DMSO : 150 mg/mL (522.10 mM; Need ultrasonic)	DMSO Solution	39695	10mM * 30uL	https://www.medchemexpress.com/Nifurtimox.html	Cancer; Infection	Launched	MCE	HYCPK27702
Propofol	MCE27702P09		70.5285	1959	10713	8754	2078-54-8	Endogenous Metabolite; GABA Receptor	Membrane Transporter/Ion Channel; Metabolic Enzyme/Protease; Neuronal Signaling	Propofol potently and directly activates GABAA receptor and inhibits glutamate receptor mediated excitatory synaptic transmission. Propofol has antinociceptive properties and is used for sedation and hypnotic[1].	27702	P09	27702P09	MedChemExpress	10mM	SM1	220718	MCE27702	16	9	220718017HYCPK27702a-2	HYCPK27702	HY-B0649	Propofol	2,6-Diisopropylphenol	178.27	Free Base	C12H18O	H2O : 0.5 mg/mL (2.80 mM; Need ultrasonic); DMSO : 100 mg/mL (560.95 mM; Need ultrasonic)	DMSO Solution	27056	10mM * 30uL	https://www.medchemexpress.com/propofol.html	Neurological Disease	Launched	MCE	HYCPK27702
Vitamin B12	MCE27703E03		94.3021	580	5909	5329	68-19-9	Endogenous Metabolite	Metabolic Enzyme/Protease	Vitamin B12 is a vitamin. Vitamin B12 plays a key role in the normal functioning of the brain and nervous system, and for the formation of blood[1][2].	27703	E03	27703E03	MedChemExpress	10mM	SM1	220718	MCE27703	5	3	220718019HYCPK27703a-2	HYCPK27703	HY-B0315	Vitamin B12	Cyanocobalamin	1355.37	Free Base	C63H88CoN14O14P	DMSO : 25 mg/mL (18.45 mM; Need ultrasonic); H2O : 8.33 mg/mL (6.15 mM; Need ultrasonic)	DMSO Solution	13786	10mM * 30uL	https://www.medchemexpress.com/Vitamin-B12.html	Metabolic Disease	Launched	MCE	HYCPK27703
Pirarubicin (Hydrochloride)	MCE27703E06		86.4182	1020	3258	2238	95343-20-7	Antibiotic; Autophagy; Bacterial; Topoisomerase	Anti-infection; Autophagy; Cell Cycle/DNA Damage	Pirarubicin Hydrochloride is an anthracycline antibiotics, acts as a topoisomerase II inhibitor, and is a widely used for treatment of various cancers, in particular, solid tumors.	27703	E06	27703E06	MedChemExpress	10mM	SM1	220718	MCE27703	5	6	220718019HYCPK27703a-2	HYCPK27703	HY-13725A	Pirarubicin (Hydrochloride)	THP Hydrochloride	664.10	Hydrochloride	C32H38ClNO12	DMSO : 20.83 mg/mL (31.37 mM; Need ultrasonic); H2O : < 0.1 mg/mL (ultrasonic;warming;heat to 60°C) (insoluble)	DMSO Solution	45897	10mM * 30uL	https://www.medchemexpress.com/pirarubicin-hydrochloride.html	Cancer; Infection	Launched	MCE	HYCPK27703
Tamibarotene	MCE27703E20		74.1623	1704	10662	8958	94497-51-5	Apoptosis; Autophagy; RAR/RXR	Apoptosis; Autophagy; Metabolic Enzyme/Protease	Tamibarotene is a retinoic acid receptor α/β (RARα/β) agonist, showing high selectivity over RARγ.	27703	E20	27703E20	MedChemExpress	10mM	SM1	220718	MCE27703	5	20	220718019HYCPK27703a-2	HYCPK27703	HY-14652	Tamibarotene	Am 80	351.44	Free Acid	C22H25NO3	DMSO : 25.5 mg/mL (72.56 mM; Need ultrasonic and warming)	DMSO Solution	11307	10mM * 30uL	https://www.medchemexpress.com/Tamibarotene.html	Cancer	Launched	MCE	HYCPK27703
Ossirene	MCE27703E21		74.897	1663	6468	4805	106566-58-9	Caspase; Interleukin Related	Apoptosis; Immunology/Inflammation	Ossirene (AS101), an immunomodulatory tellurium compound, is a potent IL-1β inhibitor[1]. Ossirene abolishes phosphorylation of STAT3 by inhibiting IL-10. Ossirene potently inhibits Caspase-1 and is used for the autoimmune diseases and certain malignancies[2][3][4].	27703	E21	27703E21	MedChemExpress	10mM	SM1	220718	MCE27703	5	21	220718019HYCPK27703a-2	HYCPK27703	HY-101019	Ossirene	AS101	312.05	xx	C2H8Cl3NO2Te	DMSO : 12.5 mg/mL (40.06 mM; ultrasonic and warming and heat to 80°C)	DMSO Solution	108945	10mM * 30uL	https://www.medchemexpress.com/ossirene.html	Cancer; Inflammation/Immunology	Phase 2	MCE	HYCPK27703
Delphinidin 3-glucoside (chloride)	MCE27703H14		73.356	1749	5065	3316	6906-38-3	Apoptosis; EGFR	Apoptosis; JAK/STAT Signaling; Protein Tyrosine Kinase/RTK	Delphinidin 3-glucoside chloride (Delphinidin 3-O-glucoside chloride) is an active anthocyanin found in bilberry extract. Delphinidin 3-glucoside chloride induces a pro-apoptotic effect in B cell chronic lymphocytic leukaemia (B CLL)[1]. Delphinidin 3-glucoside chloride exerts phytoestrogen activity by binding to ERβ, with an IC50 of 9.7 μM[2]. Delphinidin-3-O-glucoside chloride inhibits EGFR wit…	27703	H14	27703H14	MedChemExpress	10mM	SM1	220718	MCE27703	8	14	220718019HYCPK27703a-2	HYCPK27703	HY-108052	Delphinidin 3-glucoside (chloride)	Delphinidin 3-O-glucoside (chloride); Delphinidin 3-O-β-glucoside (chloride)	500.84	Chloride	C21H21ClO12	10 mM in DMSO	DMSO Solution	112428	10mM * 30uL	https://www.medchemexpress.com/delphinidin-3-glucoside-chloride.html	Cancer	No Development Reported	MCE	HYCPK27703
5-Iminodaunorubicin	MCE27703H20		80.0753	1374	3734	2360	72983-78-9	DNA/RNA Synthesis	Cell Cycle/DNA Damage	5-Iminodaunorubicin is a quinone-modified anthracycline that retains antitumor activity[1]. 5-Iminodaunorubicin produces protein-concealed DNA strand breaks in cancer cells[2].	27703	H20	27703H20	MedChemExpress	10mM	SM1	220718	MCE27703	8	20	220718019HYCPK27703a-2	HYCPK27703	HY-138645	5-Iminodaunorubicin	xx	526.54	xx	C27H30N2O9	10 mM in DMSO	DMSO Solution	116141	10mM * 30uL	https://www.medchemexpress.com/5-iminodaunorubicin.html	Cancer	No Development Reported	MCE	HYCPK27703
Braco-19 (trihydrochloride)	MCE27703J10		102.921	99	2391	2490	1177798-88-7	CMV; DNA/RNA Synthesis	Anti-infection; Cell Cycle/DNA Damage	Braco-19 trihydrochloride is a potent?telomerase/telomere?inhibitor, preventing the capping and catalytic action of telomerase. Braco-19 acts as G-quadruplex (GQ) binding ligand, stabilizing G-quadruplexes formation at the 3V telomeric DNA overhang and produce rapid senescence or selective cell death. Braco-19 is also a HAdV virus?replication inhibitor[1][2].	27703	J10	27703J10	MedChemExpress	10mM	SM1	220718	MCE27703	10	10	220718019HYCPK27703a-2	HYCPK27703	HY-15523A	Braco-19 (trihydrochloride)	xx	703.14	Hydrochloride	C35H46Cl3N7O2	H2O : 22 mg/mL (31.29 mM; Need ultrasonic and warming)	DMSO Solution	112114	10mM * 30uL	https://www.medchemexpress.com/braco-19-trihydrochloride.html	Cancer; Infection	No Development Reported	MCE	HYCPK27703
Crocin II	MCE27703K18		72.9439	1772	5129	3357	55750-84-0	COX; Endogenous Metabolite; NO Synthase	Immunology/Inflammation; Metabolic Enzyme/Protease	Crocin II is isolated from the fruit of Gardenia jasminoides with antioxidant, anticancer, and antidepressant activity. Crocin II inhibits NO production with an IC50 value of 31.1 μM. Crocin II suppresses the expressions of protein and m-RNA of iNOS and COX-2[1].	27703	K18	27703K18	MedChemExpress	10mM	SM1	220718	MCE27703	11	18	220718019HYCPK27703a-2	HYCPK27703	HY-N0698	Crocin II	xx	814.82	Free Base	C38H54O19	DMSO : 25 mg/mL (30.68 mM; Need ultrasonic)	DMSO Solution	110120	10mM * 30uL	https://www.medchemexpress.com/crocin-ii.html	Cancer; Inflammation/Immunology; Neurological Disease	No Development Reported	MCE	HYCPK27703
Pepstatin	MCE27703M14		73.2664	1754	10682	8928	26305-03-3	Autophagy; HIV Protease; Proteasome	Anti-infection; Autophagy; Metabolic Enzyme/Protease	Pepstatin (Pepstatin A) is a specific aspartic protease inhibitor produced by actinomycetes, with IC50s of 4.5 nM, 6.2 nM, 150 nM, 290 nM, 520 nM and 260 nM for hemoglobin-pepsin, hemoglobin-proctase, casein-pepsin, casein-proctase, casein-acid protease and hemoglobin-acid protease, respectively. Pepstatin Ammonium also inhibits HIV protease.	27703	M14	27703M14	MedChemExpress	10mM	SM1	220718	MCE27703	13	14	220718019HYCPK27703a-2	HYCPK27703	HY-P0018	Pepstatin	Pepstatin A	685.89	Free Acid	C34H63N5O9	DMSO : 125 mg/mL (182.24 mM; Need ultrasonic)	DMSO Solution	105698	10mM * 30uL	https://www.medchemexpress.com/Pepstatin.html	Infection; Cancer	No Development Reported	MCE	HYCPK27703
CALP2 (TFA)	MCE27703N20		73.5173	1740	9177	7437	xx	Calcium Channel; Phosphodiesterase (PDE)	Membrane Transporter/Ion Channel; Metabolic Enzyme/Protease; Neuronal Signaling	CALP2 TFA is a calmodulin (CaM) antagonist (Kd of 7.9 μM) with high affinity for binding to the CaM EF-hand/Ca2+-binding site. CALP2 TFA inhibits CaM-dependent phosphodiesterase activity and increases intracellular Ca2+ concentrations. CALP2 TFA potently inhibits of adhesion and degranulation. CALP2 TFA is also a strong activator of alveolar macrophages[1][2][3][4].	27703	N20	27703N20	MedChemExpress	10mM	SM1	220718	MCE27703	14	20	220718019HYCPK27703a-2	HYCPK27703	HY-P1076A	CALP2 (TFA)	xx	1471.72	Trifluoroacetate	C70H105F3N14O15S	DMSO : 50 mg/mL (33.97 mM; Need ultrasonic)	DMSO Solution	99404	10mM * 30uL	https://www.medchemexpress.com/calp2-tfa.html	Inflammation/Immunology	No Development Reported	MCE	HYCPK27703
Verteporfin	MCE27703O10		82.5479	1236	2728	1492	129497-78-5	Apoptosis; Autophagy; YAP	Apoptosis; Autophagy; Stem Cell/Wnt	Verteporfin (CL 318952) is a photosensitizer for photodynamic therapy to eliminate the abnormal blood vessels in the eye associated with conditions such as age-related macular degeneration. Verteporfin is a YAP inhibitor which disrupts YAP-TEAD interactions. Verteporfin induces cell apoptosis[1]. Verteporfinis an autophagy inhibitor that blocks?autophagy?at an early stage by inhibiting autophagos…	27703	O10	27703O10	MedChemExpress	10mM	SM1	220718	MCE27703	15	10	220718019HYCPK27703a-2	HYCPK27703	HY-B0146	Verteporfin	CL 318952	718.79	Free Acid	C41H42N4O8	DMSO : 75 mg/mL (104.34 mM; Need ultrasonic); DMF : 25 mg/mL (34.78 mM; Need ultrasonic)	DMSO Solution	61775	10mM * 30uL	https://www.medchemexpress.com/Verteporfin.html	Cancer	Launched	MCE	HYCPK27703
alpha-Asarone	MCE27703P06		73.1231	1762	10653	8891	2883-98-9	GABA Receptor	Membrane Transporter/Ion Channel; Neuronal Signaling	alpha-Asarone (α-Asarone) is one of the main psychoactive compounds, and possesses an antidepressant-like activity in mice.	27703	P06	27703P06	MedChemExpress	10mM	SM1	220718	MCE27703	16	6	220718019HYCPK27703a-2	HYCPK27703	HY-N0700	alpha-Asarone	α-Asarone; trans-Asarone	208.25	Free Base	C12H16O3	H2O : 0.67 mg/mL (3.22 mM; Need ultrasonic); DMSO : 100 mg/mL (480.19 mM; Need ultrasonic)	DMSO Solution	20205	10mM * 30uL	https://www.medchemexpress.com/alpha-Asarone.html	Neurological Disease	Launched	MCE	HYCPK27703
Sophocarpine (monohydrate)	MCE27703P09		71.833	1834	10719	8885	145572-44-7	Akt; Apoptosis; Autophagy; Influenza Virus; PI3K	Anti-infection; Apoptosis; Autophagy; PI3K/Akt/mTOR	Sophocarpine (monohydrate) is one of the significant alkaloid extracted from the traditional herb medicine Sophora flavescens which has many pharmacological properties such as anti-virus, anti-tumor, anti-inflammatory. Sophocarpine (monohydrate) significantly inhibits the growth of gastric cancer (GC) cells through multiple mechanisms such as induction of autophagy, activation of cell apoptosis a…	27703	P09	27703P09	MedChemExpress	10mM	SM1	220718	MCE27703	16	9	220718019HYCPK27703a-2	HYCPK27703	HY-N0103A	Sophocarpine (monohydrate)	xx	264.36	Free Base	C15H24N2O2	DMSO : 100 mg/mL (378.27 mM; Need ultrasonic)	DMSO Solution	110119	10mM * 30uL	https://www.medchemexpress.com/sophocarpine-monohydrate.html	Cancer; Infection; Inflammation/Immunology	No Development Reported	MCE	HYCPK27703
Aprotinin	MCE27704B14		82.3934	1367	39362	37995	9087-70-1	Influenza Virus	Anti-infection	Aprotinin is a bovine pancreatic trypsin inhibitor (BPTI) inhibitor which inhibits trypsin and chymotrypsin with Kis of 0.06 pM and 9 nM, respectively.	27704	B14	27704B14	MedChemExpress	10mM	SM1	220718	MCE27704	2	14	220718021HYCPK27704a-2	HYCPK27704	HY-P0017	Aprotinin	xx	6511.44	Free Base	C284H432N84O79S7	H2O : 100 mg/mL (15.36 mM; Need ultrasonic)	Water Solution	99746	10mM * 30uL	https://www.medchemexpress.com/Aprotinin.html	Cardiovascular Disease; Cancer	Launched	MCE	HYCPK27704
Sodium 2-hydroxybutanoate	MCE27704E03		73.0807	1888	10677	8789	5094-24-6	Endogenous Metabolite	Metabolic Enzyme/Protease	Sodium 2-hydroxybutanoate is an endogenous metabolite.	27704	E03	27704E03	MedChemExpress	10mM	SM1	220718	MCE27704	5	3	220718021HYCPK27704a-2	HYCPK27704	HY-W012790	Sodium 2-hydroxybutanoate	xx	126.09	xx	C4H7NaO3	H2O : 125 mg/mL (991.36 mM; Need ultrasonic)	Water Solution	64546	10mM * 30uL	https://www.medchemexpress.com/sodium-2-hydroxybutanoate.html	Metabolic Disease	No Development Reported	MCE	HYCPK27704
Tat-NR2B9c (TFA)	MCE27704G08		96.2999	589	8681	8092	1834571-04-8	iGluR; NO Synthase	Immunology/Inflammation; Membrane Transporter/Ion Channel; Neuronal Signaling	Tat-NR2B9c TFA (Tat-NR2Bct TFA) is a postsynaptic density-95 (PSD-95) inhibitor, with EC50 values of 6.7 nM and 670 nM for PSD-95d2 (PSD-95 PDZ domain 2) and PSD-95d1, respectively. Tat-NR2B9c TFA disrupts the PSD-95/NMDAR interaction, inhibiting NR2A and NR2B binding to PSD-95 with IC50 values of 0.5 μM and 8 μM, respectively. Tat-NR2B9c TFA also inhibits neuronal nitric oxide synthase (nNOS)/PS…	27704	G08	27704G08	MedChemExpress	10mM	SM1	220718	MCE27704	7	8	220718021HYCPK27704a-2	HYCPK27704	HY-P0117A	Tat-NR2B9c (TFA)	Tat-NR2Bct (TFA); NA-1 (TFA)	2632.90	Trifluoroacetate	C105H188N42O30.C2HF3O2	H2O : ≥ 50 mg/mL (18.99 mM)	Water Solution	67239	10mM * 30uL	https://www.medchemexpress.com/tat-nr2b9c-tfa.html	Neurological Disease	No Development Reported	MCE	HYCPK27704
TMPyP4 tosylate	MCE27704N09		106.113	40	698	658	36951-72-1	G-quadruplex; Telomerase	Cell Cycle/DNA Damage	TMPyP4 tosylate (TMP 1363) is a quadruplex-specific ligand, which inhibits the interaction between G-quadruplexes and IGF-1[1]. TMPyP4 tosylate (TMP 1363) is a telomerase inhibitor with antitumor effects in osteosarcoma cell lines[2].	27704	N09	27704N09	MedChemExpress	10mM	SM1	220718	MCE27704	14	9	220718021HYCPK27704a-2	HYCPK27704	HY-108477	TMPyP4 tosylate	TMP 1363	1363.60	Tosylate	C72H66N8O12S4	H2O : 25 mg/mL (18.33 mM; Need ultrasonic); DMSO : 10 mg/mL (7.33 mM; Need ultrasonic)	Water Solution	121105	10mM * 30uL	https://www.medchemexpress.com/tmpyp4-tosylate.html	Cancer	No Development Reported	MCE	HYCPK27704
Arecaidine	MCE27704P06		71.9903	1949	10735	8786	499-04-7	GABA Receptor	Membrane Transporter/Ion Channel; Neuronal Signaling	Arecaidine, a pyridine alkaloid, is a potent GABA uptake inhibitor. Arecaidine is a substrate of H+-coupled amino acid transporter 1 (PAT1, SLC36A1) and competitively inhibits L-proline uptake[1][2].	27704	P06	27704P06	MedChemExpress	10mM	SM1	220718	MCE27704	16	6	220718021HYCPK27704a-2	HYCPK27704	HY-N2368	Arecaidine	xx	141.17	xx	C7H11NO2	H2O : 250 mg/mL (1770.91 mM; Need ultrasonic)	Water Solution	107701	10mM * 30uL	https://www.medchemexpress.com/arecaidine.html	Neurological Disease	No Development Reported	MCE	HYCPK27704
6H05 (TFA)	MCE27705E03		75.4127	1774	10770	8996	2061344-88-3	Ras	GPCR/G Protein	6H05 TFA is a selective, and allosteric inhibitor of oncogenic mutant K-Ras(G12C). IC50 value: Target: K-Ras G12C 6H05 gives the greatest degree of modification, which allosterically modifies the oncogenic G12C mutant of highly homologous protein H-Ras without affecting wild-type K-Ras [1]. 6H05 can be used as an intermediate for the synthesis of other oncogenic K-Ras(G12C) inhibitors [2].	27705	E03	27705E03	MedChemExpress	10mM	SM1	220718	MCE27705	5	3	220718022HYCPK27705a-2	HYCPK27705	HY-12408A	6H05 (TFA)	xx	590.14	Trifluoroacetate	C22H31ClF3N3O4S3	DMSO : ≥ 51 mg/mL (86.42 mM)	DMSO Solution	13525	10mM * 30uL	https://www.medchemexpress.com/6H05-trifluoroacetate.html	Cancer	No Development Reported	MCE	HYCPK27705
Peficitinib	MCE27705M14		72.3177	1954	10770	8816	944118-01-8	JAK	Epigenetics; JAK/STAT Signaling; Stem Cell/Wnt	Peficitinib is an oral JAK inhibitor, with IC50s of 3.9, 5.0, 0.7 and 4.8 nM for JAK1, JAK2, JAK3 and Tyk2, respectively.	27705	M14	27705M14	MedChemExpress	10mM	SM1	220718	MCE27705	13	14	220718022HYCPK27705a-2	HYCPK27705	HY-19568	Peficitinib	ASP015K; JNJ-54781532	326.39	Free Base	C18H22N4O2	DMSO : ≥ 60 mg/mL (183.83 mM)	DMSO Solution	30535	10mM * 30uL	https://www.medchemexpress.com/Peficitinib.html	Inflammation/Immunology; Cancer	Launched	MCE	HYCPK27705
Hypocrellin A	MCE27705N04		85.6431	1179	3045	1866	77029-83-5	Bacterial; Parasite; PKC	Anti-infection; Epigenetics; TGF-beta/Smad	Hypocrellin A, a naturally occurring PKC inhibitor, has many biological and pharmacological properties, such as antitumour, antiviral, antibacterial, and antileishmanial activities. Hypocrellin A is a promising photosensitizer for anticancer photodynamic therapy (PDT)[1][2][3][4].	27705	N04	27705N04	MedChemExpress	10mM	SM1	220718	MCE27705	14	4	220718022HYCPK27705a-2	HYCPK27705	HY-N2575	Hypocrellin A	xx	546.52	Free Base	C30H26O10	DMSO : 25 mg/mL (45.74 mM; Need ultrasonic)	DMSO Solution	104397	10mM * 30uL	https://www.medchemexpress.com/hypocrellin-a.html	Cancer; Infection	No Development Reported	MCE	HYCPK27705
Methyl p-tert-butylphenylacetate	MCE27705P06		70.3748	2067	10874	8807	3549-23-3	Endogenous Metabolite	Metabolic Enzyme/Protease	Methyl p-tert-butylphenylacetate is an endogenous metabolite.	27705	P06	27705P06	MedChemExpress	10mM	SM1	220718	MCE27705	16	6	220718022HYCPK27705a-2	HYCPK27705	HY-W018501	Methyl p-tert-butylphenylacetate	xx	206.28	xx	C13H18O2	DMSO : 100 mg/mL (484.78 mM; Need ultrasonic)	DMSO Solution	111050	10mM * 30uL	https://www.medchemexpress.com/methyl-p-tert-butylphenylacetate.html	Metabolic Disease	No Development Reported	MCE	HYCPK27705
Netropsin (dihydrochloride)	MCE27705P09		75.4127	1774	10523	8749	18133-22-7	Antibiotic; Bacterial; DNA/RNA Synthesis; Influenza Virus	Anti-infection; Cell Cycle/DNA Damage	Netropsin (dihydrochloride) is a small-molecule MGB (minor-groove binder), inhibits the catalytic activity of isolated topoisomerase and interferes with the stabilization of the cleavable complexes of topoisomerase II and I in nuclei[1]. Netropsin (dihydrochloride) has potential antibiotic and antiviral properties by binding to dsDNA in a non-intercalative manner, it improves survival from murine…	27705	P09	27705P09	MedChemExpress	10mM	SM1	220718	MCE27705	16	9	220718022HYCPK27705a-2	HYCPK27705	HY-N6800A	Netropsin (dihydrochloride)	xx	503.39	Hydrochloride	C18H28Cl2N10O3	H2O : 20 mg/mL (39.73 mM; Need ultrasonic)	DMSO Solution	80464	10mM * 30uL	https://www.medchemexpress.com/netropsin-dihydrochloride.html	Infection; Inflammation/Immunology	No Development Reported	MCE	HYCPK27705
Octenidine (dihydrochloride)	MCE27706C12		76.2265	1500	7318	8818	70775-75-6	Bacterial	Anti-infection	Octenidine dihydrochloride is an effective antiseptic compound for skin mucous membranes and wounds.	27706	C12	27706C12	MedChemExpress	10mM	SM1	220720	MCE27706	3	12	220720005HYCPK27706a-2	HYCPK27706	HY-B2170A	Octenidine (dihydrochloride)	xx	623.83	Hydrochloride	C36H64Cl2N4	H2O : 33.33 mg/mL (53.43 mM; Need ultrasonic); DMSO : 5 mg/mL (8.02 mM; Need ultrasonic)	Water Solution	23549	10mM * 30uL	https://www.medchemexpress.com/Octenidine-dihydrochloride.html	Infection	Launched	MCE	HYCPK27706
L-Cysteine	MCE27706E03		84.0266	1124	10282	9158	52-90-4	Endogenous Metabolite	Metabolic Enzyme/Protease	L-Cysteine is a conditionally essential amino acid, which acts as a precursor for biologically active molecules such as hydrogen sulphide (H2S), glutathione and taurine. L-Cysteine suppresses ghrelin and reduces appetite in rodents and humans[1].	27706	E03	27706E03	MedChemExpress	10mM	SM1	220720	MCE27706	5	3	220720005HYCPK27706a-2	HYCPK27706	HY-Y0337	L-Cysteine	xx	121.16	Free Acid	C3H7NO2S	H2O : 33.33 mg/mL (275.09 mM; Need ultrasonic)	Water Solution	103359	10mM * 30uL	https://www.medchemexpress.com/L-Cysteine.html	Metabolic Disease	Launched	MCE	HYCPK27706
Neomycin (sulfate)	MCE27706J11		97.3447	482	8455	7973	1405-10-3	Antibiotic; Bacterial; Phospholipase	Anti-infection; Metabolic Enzyme/Protease	Neomycin sulfate, an aminoglycoside antibiotic, exerts antibacterial activity through irreversible binding of the nuclear 30S ribosomal subunit, thereby blocking bacterial protein synthesis. Neomycin sulfate is a known phospholipase C (PLC) inhibitor. Neomycin sulfate potently inhibits both nuclear translocation of angiogenin and angiogenin-induced cell proliferation and angiogenesis[1][2].	27706	J11	27706J11	MedChemExpress	10mM	SM1	220720	MCE27706	10	11	220720005HYCPK27706a-2	HYCPK27706	HY-B0470	Neomycin (sulfate)	xx	908.88	Sulfate	C23H52N6O25S3	H2O : 250 mg/mL (275.06 mM; Need ultrasonic)	Water Solution	21914	10mM * 30uL	https://www.medchemexpress.com/Neomycin-sulfate.html	Infection	Launched	MCE	HYCPK27706
CX-5461 dihydrochloride	MCE27706J17		72.2021	1694	8909	7215	xx	DNA/RNA Synthesis	Cell Cycle/DNA Damage	CX-5461 dihydrochloride is a potent and orally bioavailable inhibitor of Pol I-mediated rRNA synthesis, with IC50s of 142 nM in HCT-116, 113 nM in A375, and 54 nM in MIA PaCa-2 cells, and shows little or no effect on Pol II (IC50 ≥25 μM).	27706	J17	27706J17	MedChemExpress	10mM	SM1	220720	MCE27706	10	17	220720005HYCPK27706a-2	HYCPK27706	HY-13323A	CX-5461 dihydrochloride	xx	586.54	Hydrochloride	C27H29Cl2N7O2S	H2O : ≥ 25 mg/mL (42.62 mM)	Water Solution	31261	10mM * 30uL	https://www.medchemexpress.com/CX-5416_HCl.html	Cancer	Phase 1	MCE	HYCPK27706
Paromomycin (sulfate)	MCE27706K06		82.0351	1220	9664	8444	1263-89-4	Antibiotic; Bacterial; Parasite	Anti-infection	Paromomycin (Aminosidine) sulfate, a neomycin (HY-B0470) derivative, is a broad spectrum aminoglycoside antibiotic with amebicidal and bactericidal effects. Paromomycin sulfate prematures termination of translation of mRNA and inhibits protein synthesis?by specifically binds to the RNA oligonucleotide at the A site of bacterial 30S ribosomes. Paromomycin sulfate can be used for the research of ba…	27706	K06	27706K06	MedChemExpress	10mM	SM1	220720	MCE27706	11	6	220720005HYCPK27706a-2	HYCPK27706	HY-B0956	Paromomycin (sulfate)	Aminosidine (sulfate)	713.71	Sulfate	C23H47N5O18S	Ethanol : 1 mg/mL (1.40 mM; Need ultrasonic); H2O : 100 mg/mL (140.11 mM; ultrasonic and warming and heat to 80°C); DMSO : 1 mg/mL (1.40 mM; ultrasonic and warming and heat to 80°C)	Water Solution	17763	10mM * 30uL	https://www.medchemexpress.com/Paromomycin-sulfate.html	Infection	Launched	MCE	HYCPK27706
Lactoferrin (17-41) (acetate)	MCE27712B18		74.4696	1421	10176	8755	xx	Apoptosis; Bacterial; Fungal	Anti-infection; Apoptosis	Lactoferrin 17-41 (Lactoferricin B) acetate, a peptide corresponding to residues 17-41 of bovine lactoferrin, has antimicrobial activity against a wide range of microorganisms, including Gram-positive and Gramnegative bacteria, viruses, protozoa, and fungi. Lactoferrin 17-41 acetate has antitumor activities[1][2].	27712	B18	27712B18	MedChemExpress	2mM *	SM1	220720	MCE27712	2	18	220720009HYCPK27712a-2	HYCPK27712	HY-P1791B	Lactoferrin (17-41) (acetate)	Lactoferricin B (acetate); Lfcin B (acetate)	3183.82	Acetate	C143H226N46O33S3	DMSO : 20 mg/mL (6.28 mM; ultrasonic and warming and heat to 60°C)	DMSO Solution	67654	2mM * 30uL	https://www.medchemexpress.com/lactoferrin-17-41-acetate.html	Cancer; Infection	No Development Reported	MCE	HYCPK27712
DB2313	MCE27712E17		88.7864	699	4852	5551	2170606-74-1	Apoptosis	Apoptosis	DB2313 is a potent transcription factor PU.1 inhibitor with an apoptosis of 14 nM. DB2313 disrupts the interaction of PU.1 with target gene promoters. DB2313 induces apoptosis of acute myeloid leukemia (AML) cells, and has anticancer effects[1].	27712	E17	27712E17	MedChemExpress	2mM *	SM1	220720	MCE27712	5	17	220720009HYCPK27712a-2	HYCPK27712	HY-124629	DB2313	xx	708.83	xx	C42H41FN8O2	DMSO : 3.7 mg/mL (5.22 mM; ultrasonic and warming and heat to 70°C)	DMSO Solution	104174	2mM * 30uL	https://www.medchemexpress.com/db2313.html	Cancer	No Development Reported	MCE	HYCPK27712
Heparin (Lithium salt)	MCE27716A07		83.0264	1112	13115	12003	9045-22-1	Autophagy; Thrombin	Autophagy; Metabolic Enzyme/Protease	Heparin Lithium salt is an anticoagulant which binds reversibly to antithrombin III (ATIII). Heparin Lithium salt significantly inhibits exosome-cell interactions.	27716	A07	27716A07	MedChemExpress	3mg/mL	SM1	220720	MCE27716	1	7	220720017HYCPK27716a-2	HYCPK27716	HY-17567B	Heparin (Lithium salt)	xx	N/A	Lithium	(C14H25NO20S3)n.xLi	H2O : 100 mg/mL (Need ultrasonic)	Water Solution	109896	3mg/mL * 30uL	https://www.medchemexpress.com/Heparin_Lithium_salt.html	Cardiovascular Disease	Launched	MCE	HYCPK27716

## Sheet: Figure 1B
Screening Data
z'-factor for all MCE plates						Mean of all z'-factors

## Sheet: Figure 3C
Figure 3C
Values Dose response curve for IC50 value
n =3
	log Compound [µM]	26			36			41			42			47			45			46
		I	II	III	I	II	III	I	II	III	I	II	III	I	II	III	I	II	III	I	II	III
	1.47712	89.2369	100	100	100	100	99.4794	100	99.7336	93.067	100	100	100	100	98.2475	98.511	100	98.2433	100	100	100	98.5728
	1.17609	97.6992	100	95.9858	100	100	100	98.8258	95.9476	95.8601	100	100	92.704	100	96.1318	97.0084	100	86.4885	91.082	100	97.5205	91.1509
	0.875061	94.6767	96.3427	56.3237	98.0215	100	81.8084	51.1087	45.619	30.9538	100	98.6279	97.3725	98.3243	92.1834	95.246	74.3958	52.8018	51.2445	76.6251	27.3762	79.8373
	0.574031	19.5464	52.3001	38.2038	42.3198	71.0071	34.3653	11.2726	0	11.1208	79.3655	83.1907	44.7582	27.5278	13.8043	34.7122	10.3742	7.5391	19.9746	5.37021	2.21624	16.286
	0.273001	7.03614	5.77115	6.36561	10.4637	23.9038	7.3523	15.4708	0.513391	1.89457	16.0159	7.85176	10.1751	3.06806	1.07545	8.35509	4.68927	2.99267	19.8466	4.59358	3.27696	9.0655
	-0.0280287	3.69231	2.64197	2.05196	5.58361	6.69232	5.17148	3.83013	4.35116	9.18018	9.71688	4.5039	9.18373	6.82863	0.69686	9.287	7.96526	0.885556	98,141690*	5.10617	0	11.7612
	-0.329059	0	3.29394	5.14219	2.58131	4.15473	2.69373	4.07721	3.84222	8.31871	6.42603	0	5.66031	4.93339	0	8.48575	8.00823	2.68089	22.5241	10.9165	0	13.0217
	-0.630089	0	3.87677	4.72048	83,172720*	2.24457	4.98558	10.4021	1.82348	9.02487	11.6754	8.29392	11.6155	7.31501	6.31173	9.42808	2.8263	0	11.9246	16.1547	0	17.5597
		log(inhibitor) vs. response -- Variable slope (four parameters)			log(inhibitor) vs. response -- Variable slope (four parameters)			log(inhibitor) vs. response -- Variable slope (four parameters)			log(inhibitor) vs. response -- Variable slope (four parameters)			log(inhibitor) vs. response -- Variable slope (four parameters)			log(inhibitor) vs. response -- Variable slope (four parameters)			log(inhibitor) vs. response -- Variable slope (four parameters)
		Best-fit values			Best-fit values			Best-fit values			Best-fit values			Best-fit values			Best-fit values			Best-fit values
		Bottom	2.425		Bottom	4.368		Bottom	6.221		Bottom	7.458		Bottom	5.434		Bottom	7.303		Bottom	7.468
		Top	97.8		Top	101		Top	97.9		Top	99.05		Top	98.28		Top	98.18		Top	98.16
		LogIC50	0.6524		LogIC50	0.5866		LogIC50	0.9022		LogIC50	0.5177		LogIC50	0.6569		LogIC50	0.8461		LogIC50	0.8514
		HillSlope	3.34		HillSlope	3.369		HillSlope	6.706		HillSlope	5.584		HillSlope	6.82		HillSlope	4.095		HillSlope	6.864
		IC50	4.491		IC50	3.86		IC50	7.984		IC50	3.294		IC50	4.538		IC50	7.016		IC50	7.102
		Span	95.37		Span	96.63		Span	91.68		Span	91.59		Span	92.85		Span	90.88		Span	90.69
		Std. Error			Std. Error			Std. Error			Std. Error			Std. Error			Std. Error			Std. Error
		Bottom	2.973		Bottom	2.791		Bottom	1.406		Bottom	2.487		Bottom	1.284		Bottom	2.347		Bottom	3.094
		Top	4.263		Top	3.342		Top	2.911		Top	2.551		Top	1.818		Top	3.841		Top	4.749
		LogIC50	0.03432		LogIC50	0.02651		LogIC50	0.02079		LogIC50	0.02493		LogIC50	0.02143		LogIC50	0.0239		LogIC50	0.03408
		HillSlope	0.7648		HillSlope	0.7235		HillSlope	4.187		HillSlope	1.926		HillSlope	1.587		HillSlope	1.113		HillSlope	8.546
		Span	5.486		Span	4.701		Span	3.421		Span	3.693		Span	2.254		Span	4.813		Span	6.018

## Sheet: Figure 3D
Figure 3D: EC50 values for plot
n =3
4 technical replicates
		1														26														36														41
		[µM] Cpd	20240412 plate 003				20240417 plate 005				20240424 plate 006					[µM] Cpd	20240412 plate 003				20240417 plate 005				20240424 plate 006					[µM] Cpd	20240412 plate 003				20240417 plate 005				20240424 plate 006					[µM] Cpd	20240412 plate 003				20240417 plate 005
		1e+20	12134	11978	8902	7392	15268	14078	15192	13958	17183	12850	16285	11721		1e+20	12134	11978	8902	7392	15268	14078	15192	13958	17183	12850	16285	11721		1e+20	12134	11978	8902	7392	15268	14078	15192	13958	17183	12850	16285	11721		1e+20	12134	11978	8902	7392	15268
		30	127990	123760	131840	122310	132880	123900	113380	101840	159920*	159090*	231780*	149700*		30	124010	115270	121140	117730	130560	135590	128030	118050	112620	106480	97530	94181		30	213960	214710	206760	234680	212040	203860	205700	188290	172210	168730	159530	162030		30	11978	11978	8902	7392	14078
		15	152300	152570	144200	152950	149780	135040	131160	123080	122530	119970	129180	103560		15	172100	178020	168620	177580	178620	172580	164530	172580	141880	140010	131920	128610		15	218130	213150	219940	207420	191970	197350	200700	204180	163550	160230	156840	128810		15	8902	31838	38609	36752	15192
		7.5	190920	188240	199120	195990	187560	190520	212550	188980	159400	155910	151210	153210		7.5	222300	224580	237520	220080	209110	195750	201070	218160	170840	165350	173970	179040		7.5	222680	217260	234760	223480	198330	218330	205910	228680	170100	167220	176290	164160		7.5	7392	45495	52620	49048	13958
		3.75	206160	188600	227270	219250	211800	203350	212050	218070	172300	166150	172080	175840		3.75	216160	212430	222300	225800	206640	207070	217660	215590	175300	192420	180310	175240		3.75	220460	210510	222180	239760	204440	202840	217490	224190	178770	172670	176570	149250		3.75	200240	201090	201130	195730	169240
		1.875	232350	229680	244840	231540	229900	214570	245040	228160	182890	181400	196790	184860		1.875	214740	219360	216540	237010	243740	214050	225640	217820	177580	186970	188990	156090		1.875	225300	223130	238950	235230	230410	218040	216000	214310	203590	172370	224060	145190		1.875	218250	234400	210380	216310	218460
		0.9375	229770	219460	261350	234040	252650	218190	257850	223690	189670	198300	190760	193220		0.9375	232480	219480	253490	235000	227290	206600	219400	215060	191170	184040	192650	179410		0.9375	221110	222710	222240	247620	220100	210940	214490	221150	294500	193360	186120	179230		0.9375	223400	228860	236190	230560	196640
		0.46875	248640	220430	245420	249570	220110	213620	245360	217320	195690	185260	202910	191950		0.46875	232560	227030	243330	237610	214320	222990	230080	210580	189030	191060	193060	184740		0.46875	255830	220510	251460	251360	228180	221040	219850	212990	186720	180810	183540	163690		0.46875	234760	229650	234560	240360	216840
		0.234375	240540	256210	269030	261860	245740	255520	265570	241700	203250	192550	225860	210600		0.234375	238860	246830	251780	270410	228170	234100	248260	239260	191970	194800	201880	208150		0.234375	237760	227850	246980	257820	232170	228600	236910	236490	199320	190740	204290	200010		0.234375	257100	241720	271740	263420	229320
		1e-20	233156	233156	233156	233156	222249	222249	222249	222249	186487	186487	186487	186487		1e-20	233156	233156	233156	233156	222249	222249	222249	222249	186487	186487	186487	186487		1e-20	233156	233156	233156	233156	222249	222249	222249	222249	186487	186487	186487	186487		1e-20	233156	233156	233156	233156	222249
	log(inhibitor) vs. response -- Variable slope (four parameters)		Bottom		Top		LogIC50		HillSlope		IC50		Span				Bottom		Top		LogIC50		HillSlope		IC50		Span				Bottom		Top		LogIC50		HillSlope		IC50		Span				Bottom		Top		LogIC50
			Value	SEM	Value	SEM	Value	SEM	Value	SEM	Value	SEM	Value	SEM			Value	SEM	Value	SEM	Value	SEM	Value	SEM	Value	SEM	Value	SEM			Value	SEM	Value	SEM	Value	SEM	Value	SEM	Value	SEM	Value	SEM			Value	SEM	Value	SEM	Value
		20240412 plate 003	0.273529	2.69243	105.959	1.73598	1.41542	0.0433414	-0.951883	0.102868	26.0265		105.686	3.25044		20240412 plate 003	10082.2	5667.04	236056	2612.79	1.45801	0.0277371	-1.64884	0.184006	28.7087		225974	6283.72		20240412 plate 003	10116.3	5397.2	239168	4809.26	3.41619	0.96426	-0.45807	0.229087	2607.3		229051	7231.17		20240412 plate 003	3.07301	1.65977	101.259	1.26945	0.716959
		20240417 plate 005	0.587417	3.67332	107.267	2.1132	1.34912	0.0479509	-1.14118	0.152671	22.3419		106.68	4.30793		20240417 plate 005	14618.9	4546.37	225164	2228.98	1.52396	0.0307392	-1.40436	0.149995	33.416		210545	5094.7		20240417 plate 005	14638.4	4174.52	226531	3707.94	3.21823	0.622078	-0.466163	0.166204	1652.85		211893	5585.82		20240417 plate 005	2.76597	2.1404	97.8526	1.60219	0.725211
		20240424 plate 006	0.00672463	2.56043	105.946	1.53462	1.28232	0.0433214	-1.22421	0.164912	19.1567		105.939	3.00485		20240424 plate 006	14559.7	4226.52	190048	2139.94	1.47182	0.0324117	-1.34334	0.1459	29.6362		175489	4777.96		20240424 plate 006	14639.6	11711.8	195214	9985.47	2.47639	0.742055	-0.536149	0.36699	299.495		180575	15413.9		20240424 plate 006	-0.717238	2.67243	99.0966	1.68203	0.825855
	Plot Fig. 3D
	[µM] Cpd	log [µM]	1			26			36			41			42			47			45			46
			Mean	SD	N	Mean	SD	N	Mean	SD	N	Mean	SD	N	Mean	SD	N	Mean	SD	N	Mean	SD	N	Mean	SD	N
	30	1.47712	50.9812	1.68487	2	51.6594	2.80489	3	90.4459	2.56209	3	0	0	3	-6.24215	1.9712	3	85.9658	1.6511	3	88.8315	1.63807	3	7.96103	10.7675	3
	15	1.17609	60.486	2.54448	3	73.2547	2.72038	3	86.8161	5.97639	3	14.0517	4.24399	3	-6.06917	1.93402	3	92.9941	7.77695	3	90.1857	1.62531	3	23.0539	14.5633	3
	7.5	0.875061	83.5775	2.83181	3	93.5937	2.8245	3	93.8946	3.3133	3	25.4794	10.7953	3	-4.2983	0.944204	3	97.9019	3.75487	3	97.1239	2.75166	3	64.834	6.75306	3
	3.75	0.574031	91.9455	2.54136	3	95.1243	1.49498	3	93.5811	3.0938	3	82.6059	3.41076	3	41.4857	13.6699	3	97.1553	0.804095	3	102.664	13.584	3	94.7857	0.649572	3
	1.875	0.273001	101.367	1.83557	3	97.0518	3.83302	3	99.1793	0.620319	3	91.2126	3.63803	3	93.2074	3.03934	3	102.426	4.48138	3	100.396	2.61685	3	96.7745	2.12532	3
	0.9375	-0.0280287	104.252	3.1704	3	99.5278	1.77715	3	103.594	10.3948	3	93.7654	4.38691	3	96.7503	0.589413	3	101.523	2.44519	3	105.039	10.1484	3	97.1212	1.64109	3
	0.46875	-0.329059	102.919	1.80173	3	100.432	1.58152	3	99.949	4.92171	3	97.3545	3.53768	3	99.7309	2.31181	3	101.313	4.90032	3	101.332	3.6245	3	98.9344	4.89544	3
	0.234375	-0.630089	112.53	1.87202	3	107.716	0.623565	3	105.571	1.40594	3	108.894	2.87265	3	110.374	2.05665	3	109.08	2.85344	3	109.565	2.76655	3	103.912	2.12154	3
[truncated: 59 more columns]

## Sheet: Figure 4A 
Figure 4A: Cell viability assay with menadione
n =4
4 technical replicates
		26																		36																		47
		[compound µM]	20240508 plate 012 w/o Menadione				20240508 plate 013 w/o Menadione				20240515 plate 015 w/o Menadione				20240515 plate 014 w/o Menadione					[compound µM]	20240508 plate 012 w/o Menadione				20240508 plate 013 w/o Menadione				20240515 plate 015 w/o Menadione				20240515 plate 014 w/o Menadione					[compound µM]	20240508 plate 012 w/o Menadione				20240508 plate 013 w/o Menadione				20240515 plate 015 w/o Menadione
		60	99689	101490	84509	79427	134290	122910	116270	111590	107440	108250	101690	106720	111950	97592	107610	119030		60	344220	331510	355900	344190	348460	354210	355750	353860	321900	321160	330420	326560	336500	373330	357790	375230		60	309000	323530	287920	324080	294060	325150	301550	314910	292640	290230	291370
		30	178520	177190	190990	182770	197380	188480	192620	197570	165090	169770	165600	178450	195430	197940	209200	205950		30	348650	347840	366110	365510	362770	369030	365650	461440	326510	332180	340410	339810	354280	363230	371180	376730		30	338540	348450	357680	361520	326280	331870	354040	345370	308600	311450	325210
		15	295160	291000	306610	315750	318330	382250	331430	341500	225790	244140	209910	233720	250630	277070	278420	291070		15	390930	375230	448500	443430	394180	392840	391700	389320	354410	435540	345790	416620	392830	387940	370750	396460		15	442020	407540	412630	398890	390150	392520	393400	396640	355740	361450	338520
		7.5	357180	358540	375580	345860	360940	352750	362790	359790	317620	329860	378160	418820	320930	314060	325170	308190		7.5	385210	396370	371980	372320	405510	393590	402690	387370	356280	367960	366010	366080	380800	387250	402000	397370		7.5	495890	394280	400970	404470	392490	381070	376820	393330	363930	358300	404440
		DMSO	419045				394965				408868				408215					DMSO	419045				394965				408868				408215					DMSO	419045				394965				408868
			20240508 plate 012 w Menadione				20240508 plate 013 w Menadione				20240515 plate 015 w Menadione				20240515 plate 014 w Menadione						20240508 plate 012 w Menadione				20240508 plate 013 w Menadione				20240515 plate 015 w Menadione				20240515 plate 014 w Menadione						20240508 plate 012 w Menadione				20240508 plate 013 w Menadione				20240515 plate 015 w Menadione
		60	887	1119	763	819	1002	1130	762	854	969	1009	941	1065	1032	1148	928	1048		60	158210*	163010*	19082*	18545*	166210*	174600*	20028*	18681*	185100*	184480*	111650*	66878*	33336	33031	28059	24828		60	68212*	77972*	10202	14953	97500*	94661*	7245	13149	24869	20588	9258
		30	1963	1567	1519	1679	2014	1822	1886	1814	1901	2125	2013	2121	2297	1753	1973	1576		30	24245	20350	24935	20723	21997	20914	24666	21857	24014	26245	23994	40225	26699	30187	27245	26622		30	17555	22131	18922	17419	13658	13606	15514	16155	19537	20556	18511
		15	16068	16641	13955	16324	9524	13189	11326	10737	13096	21137	11369	18956	20636	18543	12831	13164		15	22111	21413	21368	22937	69935*	23670	27045	22274	27690	32043	28425	26586	28312	27245	29168	29878		15	20771	17972	20655	18810	17686	14464	20096	19671	23978	24873	26687
		7.5	22448	19078	21725	25068	20201	21091	22114	18985	24255	28517	25844	26121	32103	30914	33272	31501		7.5	27030	23198	28223	26549	27603	23558	27792	26913	27895	33778	30188	31212	28096	25755	28850	30838		7.5	13447	15406	23888	24895	16840	14275	23542	21544	23813	26835	27301
		40µM Menadione only	30834				28223.5				35002				37048.8					40µM Menadione only	30834				28223.5				35002				37048.8					40µM Menadione only	30834				28223.5				35002
			20240508 plate 012 w/o Menadione		20240508 plate 013 w/o Menadione		20240515 plate 015 w/o Menadione		20240515 plate 014 w/o Menadione												20240508 plate 012 w/o Menadione		20240508 plate 013 w/o Menadione		20240515 plate 015 w/o Menadione		20240515 plate 014 w/o Menadione												20240508 plate 012 w/o Menadione		20240508 plate 013 w/o Menadione		20240515 plate 015 w/o Menadione		20240515 plate 014 w/o Menadione
			Mean	SEM	Mean	SEM	Mean	SEM	Mean	SEM											Mean	SEM	Mean	SEM	Mean	SEM	Mean	SEM											Mean	SEM	Mean	SEM	Mean	SEM	Mean	SEM
		60	21.7826	1.30942	30.7027	1.24661	25.9313	0.361584	26.7128	1.09866										60	82.0807	1.18858	89.3926	0.402706	79.4902	0.529127	88.3634	2.19648										60	74.248	2.02573	78.2138	1.75174	70.8945	0.39736	71.2517	0.486975
		30	43.5198	0.742337	49.1214	0.549593	41.5115	0.755907	49.5156	0.797007										30	85.2003	1.21103	98.6726	6.0613	81.8668	0.811601	89.7456	1.19695										30	83.8925	1.2243	85.929	1.5993	77.6889	1.08538	80.2733	1.48511
		15	72.0997	1.33941	86.9386	3.49355	55.8591	1.76472	67.1944	2.08121										15	98.9208	4.40599	99.2517	0.260774	94.9181	5.46395	94.8018	1.39372										15	99.0991	2.23288	99.5473	0.339972	86.8391	1.41974	88.0516	1.30469
		7.5	85.7402	1.46256	90.9111	0.555648	88.3206	5.68745	77.6766	0.917743										7.5	91.0332	1.39452	100.589	1.05619	89.0464	0.645623	95.9923	1.17644										7.5	101.159	5.74849	97.7117	1.04495	90.7242	2.75508	86.776	0.423297
		DMSO Ko, no Mendione	100	0	100	0	100	0	100	0										DMSO Ko, no Mendione	100	0	100	0	100	0	100	0										DMSO Ko, no Mendione	100	0	100	0	100	0	100	0
			20240508 plate 012 w Menadione		20240508 plate 013 w Menadione		20240515 plate 015 w Menadione		20240515 plate 014 w Menadione												20240508 plate 012 w Menadione		20240508 plate 013 w Menadione		20240515 plate 015 w Menadione		20240515 plate 014 w Menadione												20240508 plate 012 w Menadione		20240508 plate 013 w Menadione		20240515 plate 015 w Menadione		20240515 plate 014 w Menadione
			Mean	SEM	Mean	SEM	Mean	SEM	Mean	SEM											Mean	SEM	Mean	SEM	Mean	SEM	Mean	SEM											Mean	SEM	Mean	SEM	Mean	SEM	Mean	SEM
		60	2.90913	0.253688	3.31993	0.287462	2.84556	0.0768559	2.80441	0.121541										60							80.471	5.5477										60	40.7911	7.70417	36.1295	10.4594	50.2251	9.5946	48.8356	9.02467
		30	5.45503	0.322643	6.6753	0.163805	5.82825	0.151707	5.1277	0.419254										30	73.1766	3.83035	79.2196	2.85536	81.7654	11.1548	74.7346	2.2791										30	61.6423	3.55231	52.2021	2.30028	59.236	3.62742	49.9969	3.83359
		15	51.0703	1.97418	39.662	2.7052	46.1103	6.6456	43.9785	5.26738										15	71.2113	1.19418	86.2037	5.01786	81.9554	3.37434	77.3325	1.53174										15	63.4106	2.2449	63.7032	4.54961	70.7318	2.01098	68.7634	4.42774
		7.5	71.6086	3.99425	72.981	2.35486	74.808	2.51289	86.2309	1.35987										7.5	85.1334	3.49116	93.7748	3.49968	87.9044	3.48425	76.6145	2.83451										7.5	62.9468	9.44275	67.4979	7.52192	75.4722	2.53258	62.2423	1.95125
		40µM Menadione only	100	0	100	0	100	0	100	0										40µM Menadione only	100	0	100	0	100	0	100	0										40µM Menadione only	100	0	100	0	100	0	100	0
		2 way ANOVA																		2 way ANOVA																		2 way ANOVA
		Number of families	1																	Number of families	1																	Number of families	1
		Number of comparisons per family	5																	Number of comparisons per family	5																	Number of comparisons per family	5
		Alpha	0.05																	Alpha	0.05																	Alpha	0.05
		Šídák's multiple comparisons test	Mean Diff,	95,00% CI of diff,	Below threshold?	Summary	Adjusted P Value													Šídák's multiple comparisons test	Predicted (LS) mean diff,	95,00% CI of diff,	Below threshold?	Summary	Adjusted P Value													Šídák's multiple comparisons test	Mean Diff,	95,00% CI of diff,	Below threshold?	Summary	Adjusted P Value
		w/o menadione - w menadione																		w/o menadione - w menadione																		w/o menadione - w menadione
		60	23.31	12,77 to 33,86	Yes	****	<0,0001													60	4.361	-10,81 to 19,53	No	ns	0.9419													60	29.66	20,14 to 39,18	Yes	****	<0,0001
		30	40.15	29,60 to 50,69	Yes	****	<0,0001													30	11.65	2,055 to 21,24	Yes	*	0.0118													30	26.18	16,66 to 35,70	Yes	****	<0,0001
		15	25.32	14,77 to 35,86	Yes	****	<0,0001													15	17.8	8,205 to 27,39	Yes	***	0.0001													15	26.73	17,21 to 36,25	Yes	****	<0,0001
		7.5	9.255	-1,290 to 19,80	No	ns	0.1075													7.5	8.308	-1,284 to 17,90	No	ns	0.1142													7.5	27.05	17,53 to 36,57	Yes	****	<0,0001
		DMSO	0	-10,55 to 10,55	No	ns	>0,9999													DMSO	0	-9,592 to 9,592	No	ns	>0,9999													DMSO	0	-9,519 to 9,519	No	ns	>0,9999
[truncated: 22 more columns]

## Sheet: Figure 4C
Figure 4C: Electropherogram data
		DMSO			30µM 47			30 µM 26
		60 µM menadione	40 µM menadione	0 µM menadione	60 µM menadione	40 µM menadione	0 µM menadione	60 µM menadione	40 µM menadione	0 µM menadione
	1	0	0	0	0	0	0	0	0.393122	0
	2	0	0	0	0	0	0	0	0.0906627	0
	3	0	0	0	0	0	0	2.7774	0	0
	4	0	0	0	0	0	0	4.24073	0	0
	5	0	0	0	0	0	0	4.97456	0	0
	6	0	0	0	0	0	0	5.14414	0	0
	7	0	0	0	0	0	0	4.344	0.00582381	0
	8	0	0	0	0	0	0	3.09759	0.403447	0
	9	0	0	0	0	0	0	1.60543	0.508664	0
	10	0	0	0	0	0	0	1.05635	0.71732	0
	11	0	0	0	0	0	0	1.46868	0.760998	0
	12	0	0	0	0	0	0	1.2356	1.0453	0
	13	0	0	0	0	0	0	1.7123	1.04159	0
	14	0	0	0	0	0	0	1.64125	1.15568	0
	15	0	0	0	0	0	0	1.47449	1.1195	0
	16	0	0	0	0	0	0	1.93559	0.835995	0
	17	0	0	0	0	0	0	2.61679	0.501553	0
	18	0	0	0	0	0	0	2.66679	0.159055	0
	19	0	0	0	0	0	0	2.51776	0.0743576	0
	20	0	0	0	0	0	0	1.98435	0	2.85278
	21	0	0	0	0	0	0	1.29102	0.0713559	3.26123
	22	0	0	0	0	0	0	1.12107	0.311671	2.66629
	23	0	0	0	0	0	0	1.18615	0.512931	2.17271
	24	0	0	0	0	0	0	0.805417	0.591394	1.55467
	25	0	0	0	0	0	0	0.615942	0.789158	1.02477
	26	0	0	0	0	0	0	0.783266	0.857633	0.431105
	27	0	0	0	0	0	0	0.21022	0.796996	0.0562023
	28	0	0	0	0	0	0	0.104237	0.514642	0.545441
	29	0	0	0	0	0	4.51923	0.309794	0.427958	0.161256
	30	0	0	0	0	0	3.83756	0.173342	0.204155	0.144957
	31	0	0	0	0	2.31288	3.73015	0.168737	0.294702	0.396323
	32	0	0	0	0	3.87574	3.34563	0.424347	0.460831	0.591566
	33	0	0	0	0	3.56417	3.50628	0.492446	0.472433	0.911163
	34	0	0	0	0	3.74097	3.18881	0.528445	0.240823	1.09928
	35	0	0	0	0	4.27068	2.17817	0.556541	0.112577	0.762206
	36	0	0	0	0	4.14048	1.65056	0.683742	0.0174272	0.0807445
	37	0	0	0	0	3.20695	1.37281	0.804914	0.0580895	0
	38	0	0	0	0	1.61183	0.425284	0.782853	0.335491	0
	39	0	0	0	0	0.417541	0	0.434039	0.646934	0.220187
	40	0	0	0	2.14973	0.075888	0.0121085	0.0799235	0.981929	1.02364
	41	0	0	0	5.16162	0.566596	0.00024217	0.238601	1.33195	1.3625
	42	0	0	0	6.04703	0.756968	0	0.018699	1.6328	1.67181
	43	0	0	0	6.52197	1.1088	0.416512	0	1.45066	1.54057
	44	0	0	0	6.58358	1.17987	0.246123	0.093441	0.928716	0.741389
	45	0	0	0	6.15934	1.07312	0.0126243	0.047746	0.347601	0.446442
	46	0	3.57252	0	5.61775	0.917834	0.44499	0.524464	0	0.26357
	47	0	3.35851	0	3.8744	0.892176	0.772247	0.658005	0.0470998	0.0786329
	48	0	2.08761	0	2.40369	0.613583	0.219974	0.576021	0.296287	0.315653
	49	0	1.7595	0	1.4194	0.673143	0.284183	0.259424	0.549774	0.412454
	50	0	1.96106	1.30064	0.279	0.733247	0.729626	0.0386972	0.738049	0.245974
	51	4.80051	1.53896	5.01312	0.288971	0.785328	0.264525	0.353964	0.737235	0.00170265
	52	6.58648	1.45772	4.99282	1.12749	0.0771952	0.00269038	0.306616	0.586853	0.0387901
	53	7.3441	1.24254	5.04277	2.48721	0.0206975	0	0.452996	0.587633	0.0722618
	54	7.48736	0.835666	5.23764	2.36428	0.107193	0.353478	0.300449	0.810887	0.188052
	55	6.42573	1.24461	5.32694	1.69933	0.430663	0.0918894	0.0138274	0.74299	0.489797
	56	4.75854	1.71696	4.07332	1.19621	0.978245	1.05301	0.0609405	0.618284	0.424824
	57	2.66237	1.20052	2.27636	0.338553	0.885311	1.07669	0.0586271	0.329691	0.157619
	58	1.51494	0.598209	0.594514	0.352672	0.545459	0.555055	0.321904	0.17345	0.18059
	59	0.585798	0.146035	0.0224154	0.254425	0.217785	0.447082	0.411938	0.233955	0.201594
	60	0.845471	0.140383	0.299198	0.770885	0.132189	0.466942	0.30473	0.0908718	0.445188
	61	1.39895	0.885072	1.0633	1.16662	0.650386	1.18229	0.131846	0	0.407087
	62	2.16056	1.69592	0.705557	1.41688	0.506534	1.46452	0	0	0.204931
	63	3.1452	1.2594	0.565903	0.886896	0.230012	1.83401	0.154931	0.0345194	0.0409758
	64	2.37507	1.2289	0.1711	0.685911	0	2.17417	0.160277	0	0.142901
	65	1.48928	1.01484	0.396655	0.200858	0.203846	1.96391	0.295496	0	0.368843
	66	0.798832	0.859352	0.145466	0.00707919	0.336926	2.16275	0.608308	0.0801991	0.770722
	67	0.960224	1.20093	0.456654	0.460982	1.09614	2.00675	0.746345	0.0695169	0.856052
	68	0.246639	1.2229	0.817496	0.846449	1.71469	1.88139	0.384511	0.0102429	0.627035
	69	0.0116379	0.638576	1.31605	0.96655	1.16341	1.09227	0.191239	0.0368232	0.391359
	70	0.073693	0.36222	1.58718	0.9288	0.92408	0.50264	0.254607	0.109851	0.498457
	71	0.496378	0.531428	1.56557	1.16053	0.948567	0.8657	0	0.0336447	0.494916
	72	0.989341	0.729681	0.638071	1.31953	0.297587	0.659391	0.0163021	0	0.231375
	73	2.45229	0.902341	0.20636	1.16751	0.207152	0.669766	0.533143	0	0.315317
	74	1.5987	1.102	0	0.943986	0.583489	0.419983	0.626115	0.0111081	0.225412
	75	1.13157	0.834828	0	0.664737	0.474682	0.329233	0.61201	0.107268	0.0431409
	76	0.409513	0.232951	0.00686876	0.266176	0.366154	0.546074	0.388933	0.181378	0
	77	0.224888	0.0591449	0.587603	0.00604226	0.810126	1.16433	0.0465745	0.19581	0.157601
	78	0.0258969	0	1.02828	0.402799	0.958293	1.76387	0	0.115197	0.353452
	79	0.249161	0	1.26205	0.759713	0.891243	1.2332	0	0.00273355	0.148492
	80	0.350723	0.16517	0.933003	0.842537	0.469855	0.710602	0.108401	0	0.588094
	81	0.539634	0.211431	0.420358	1.15517	0.26574	0.147793	0	0	0.824584
	82	1.53827	0.0487642	0.32632	1.38223	0	0	0.327352	0.0154391	0.955228
	83	2.65499	0.243506	0.683665	0.983492	0	0.447375	0.295253	0.0576826	0.852581
	84	2.89207	0	0.771622	0.714269	0.10079	0.936444	0	0.167987	0.612634
	85	2.17371	0.32496	0.733249	0.604442	0.380309	1.05148	0	0.0505779	0.267063
	86	1.56306	0.790032	0.441939	0.145796	0.30889	1.02014	0	0.0895145	0
	87	0.195913	1.51323	0.0158437	0	0	0.375583	0	0.3353	0
	88	0.129828	1.1044	0	0	0	0	0	1.05412	0
	89	0.0157553	0.924245	0.264607	0	0	0.0287933	0	2.21978	0
	90	0.171141	0.233828	0.818949	0	0.0996147	0	0	3.12195	0.0856693
	91	0	0.110976	1.32333	0.00647908	0.710837	0	0	3.74972	0.00477554
	92	0	0.0170993	0.851525	0.0486134	0.869738	0.176224	0.0410762	3.96772	0
	93	0.0125218	0.113623	0.147832	0.0529126	0.288778	0.197753	0	4.08632	0
	94	0	0.700184	0.237267	0	0.012568	0.0810459	0.107715	4.21817	0
	95	0	0.416047	0.614964	0	0	0	0	4.68287	0
	96	0.413869	0.0119993	0.606003	0	0.192671	0.0728401	0	5.71511	0
	97	0.544544	0.170393	0.677553	0.0147153	0.912902	0.010068	0	6.49034	0.0467892
	98	0.266618	0.168846	0.263389	0	1.00975	0	0	7.52447	0.232157
	99	0.412426	0.0938526	0	0.0116877	0.436646	0	0	8.2174	0.0933726
	100	0.349472	0.360418	0	0.0779182	0.0561224	0.0258702	0	9.0452	0
	101	0.225492	0.480446	0	0	0	0	0	9.89887	0
	102	0	0.0731353	0	0	0	0	0	10.6306	0
	103	0	0	0.0570512	0	0	0	0	11.7787	0
	104	0	0	0	0	0	0	0	12.9472	0
	105	0	0	0	0	0	0	0	14.5209	0
	106	0	0	0.146013	0.139493	0	0	0	16.0857	0
	107	0	0	0	1.32215	0	0	0	18.1038	0
	108	0	0	0	3.1983	0	0	0	19.8853	0
	109	0	0	0	5.58086	0	0	0	21.4921	0
	110	0	0	0	7.81458	0.0358853	0	0	23.4948	0
	111	0	0	0	9.64394	0.314655	0	1.72062	26.0804	1.03594
	112	0	0	0	10.2462	0.067939	0	4.42014	29.5294	3.41369
	113	0	0.0166507	0	11.5132	0	0	7.81247	34.6043	5.43661
	114	0	0.788294	0	12.984	0.451285	0	13.5633	41.0756	7.13647
	115	0	2.44477	0	14.7885	3.04637	0	20.6482	50.1527	9.40757
	116	0	4.70314	0	17.4544	7.06341	0	30.7925	63.7195	12.5494
	117	0	7.49073	0	21.9294	12.6768	4.80854	45.6885	82.929	17.3891
	118	2.09004	11.4669	0	28.73	21.8961	16.5187	68.5422	112.392	24.7756
	119	7.66074	16.8343	0	39.5668	36.2498	34.7306	103.748	156.193	38.0356
	120	16.2422	25.8025	1.7683	57.3832	59.0746	64.8397	153.366	216.614	60.009
	121	30.859	41.3964	18.6128	85.2949	94.9526	108.353	227.722	299.183	96.3405
	122	54.8764	69.3315	52.2878	130.176	149.445	178.659	329.483	409.699	153.946
	123	96.4078	112.354	105.863	201.266	234.624	274.549	468.204	555.325	237.211
	124	164.175	187.139	191.408	306.738	349.509	413.118	646.457	743.069	369.145
	125	273.933	293.36	310.913	455.322	518.948	596.296	880.4	984.827	548.034
	126	428.624	454.778	483.978	657.252	745.06	844.912	1185.98	1295.39	804.239
	127	652.053	675.596	720.333	929.021	1045.13	1160.9	1553.73	1671.31	1140.22
	128	962.904	988.98	1033.84	1278.34	1415.41	1557.02	2005.1	2103.13	1581.58
	129	1380.43	1395.25	1448.14	1727.72	1881.52	2019.78	2513.34	2589.15	2111.85
	130	1900.68	1918.2	1950.43	2256.8	2404.42	2543.09	3038.75	3091.81	2701.6
	131	2523	2524.86	2523.56	2846.72	2967.76	3095.9	3556.77	3536.55	3251.35
	132	3199.03	3186.01	3152.12	3457.86	3558.66	3648.99	4044.69	3973.9	3780.95
	133	3866.63	3837.95	3771.52	4027.98	4100.95	4147.54	4446.46	4349.71	4272.96
	134	4445.71	4393.9	4320.12	4508.46	4552.86	4570.09	4756.27	4659.97	4677.51
	135	4838.85	4804.42	4739.76	4832.9	4852.74	4853.06	4942.29	4879.55	4922.53
	136	4993.91	4977.74	4971.96	4999.95	4988.11	4999.17	4998.08	4983.53	4998.57
	137	4873.91	4935.16	4969.03	4952	4951.52	4960.2	4913.74	4946.3	4845.2
	138	4537.94	4649.2	4759.44	4737.33	4735.22	4779.4	4707.44	4755.31	4490.79
	139	4013	4208.63	4379.69	4360.37	4407.65	4449.37	4402.12	4484.83	4046.07
	140	3398.8	3649.14	3873.88	3883.03	3959.34	4022.62	4000.89	4134.74	3544.57
	141	2776.05	3050.56	3309.1	3341.56	3454.96	3539.79	3560.94	3731.47	3022.64
	142	2194.53	2470.55	2737.72	2790.58	2929.14	3034.13	3099.62	3314.53	2520.85
	143	1706.96	1947.67	2205.41	2290.88	2426.38	2546.18	2648.7	2902.23	2056.35
	144	1314.52	1508.18	1738.26	1843.59	1982.18	2100.97	2232.17	2507.69	1664.86
	145	1011.22	1154.07	1352.44	1474.61	1595.14	1710.39	1873.62	2151.74	1349.39
	146	767.689	892.53	1048.48	1178.96	1287.05	1386.23	1563.52	1848.3	1102.4
	147	599.038	695.963	814.041	951.396	1035.34	1122.86	1317.15	1586.62	910.942
	148	476.27	554.161	632.372	769.925	844.86	915.041	1123.04	1359.28	772.847
	149	392.662	452.775	503.716	639.242	697.21	751.066	973.179	1189.41	668.652
	150	333.941	383.525	412.513	541.528	587.449	629.913	858.339	1056.35	591.041
	151	295.791	330.64	347.468	469.631	503.55	538.045	769.952	960.632	529.798
	152	266.156	293.033	300.363	416.299	441.659	469.935	703.639	887.937	484.343
	153	241.692	263.678	265.491	378.583	392.218	418.109	653.346	834.882	451.648
	154	219.51	239.889	235.934	349.012	352.995	379.35	619.785	798.739	425.74
	155	198.159	219.619	210.86	325.017	320.699	346.423	596.999	772.244	404.426
	156	178.76	201.583	187.683	303.142	293.773	318.865	581.997	757.203	387.097
	157	159.114	184.073	166.692	283.153	271.312	295.967	574.428	751.167	371.459
	158	140.909	168.01	147.034	264.093	251.632	275.931	572.178	751.288	358.523
	159	123.156	152.502	129.123	247.581	236.197	258.846	575.011	756.531	347.489
	160	106.682	138.261	111.384	234.01	223.156	245.15	582.138	765.076	338.838
	161	92.4764	125.609	95.2378	224.089	212.361	234.013	592.054	777.952	331.45
	162	81.5018	114.091	81.1108	217.67	203.916	225.517	603.315	791.822	327.73
	163	72.7154	103.752	68.7134	213.622	198.564	219.827	617.448	808.436	326.731
	164	66.5791	96.001	57.974	211.382	196.036	216.137	636.997	830.378	329.747
	165	63.8894	90.3876	49.4087	212.149	197.814	216.764	663.255	860.542	335.897
	166	62.7546	88.481	43.8413	217.218	203.248	220.5	696.076	895.679	345.243
	167	64.0181	90.1606	41.1614	226.723	214.328	229.574	733.98	937.339	358.485
	168	67.9835	94.122	41.4578	241.738	229.573	243.109	775.354	984.633	375.275
	169	75.1688	100.88	43.1887	261.819	250.784	263.949	825.025	1031.55	396.506
	170	86.1871	111.272	46.9513	285.76	278.654	288.673	878.223	1087.55	421.267
	171	102.427	125.792	54.1186	315.814	314.602	319.453	932.969	1142.88	451.86
	172	124.595	146.913	65.2463	354.147	358.988	356.779	989.844	1208.65	487.729
	173	154.16	176.115	80.0558	399.355	412.301	401.168	1054.92	1275.94	530.449
	174	191.6	214.366	98.8694	455.032	475.494	456.353	1129.62	1351.44	579.294
	175	240.536	264.376	123.676	517.601	546.006	521.954	1205.62	1431.11	636.137
	176	301.933	329.508	155.423	591.072	632.505	598.957	1291.74	1510.22	697.37
	177	378.617	409.036	196.648	673.189	732.724	685.693	1380.33	1602.62	763.92
	178	470.418	506.462	246.57	760.904	844.214	781.275	1467.15	1689.91	838.097
	179	580.547	618.605	308.303	853.287	967.147	883.654	1549.56	1776.79	915.892
	180	706.078	744.43	379.452	956.52	1107.1	996.202	1626.9	1849.88	1003.37
	181	849.816	891.239	464.114	1063.91	1255.39	1113.83	1695.94	1920.92	1094
	182	1008.16	1052.88	560.429	1174.7	1406.4	1237.5	1743.34	1978.05	1194.22
	183	1180.45	1223.72	668.188	1288.42	1558.28	1362.12	1784.54	2026.49	1294.29
	184	1357.5	1400.12	785.487	1401.54	1712.49	1489.64	1821.15	2063.12	1395.67
	185	1542.43	1584.08	912.53	1509.01	1853.29	1617.91	1845.51	2092.58	1494.3
	186	1710.88	1758.76	1042.83	1609.03	1985.11	1741.86	1859.8	2111.53	1583.89
	187	1879.28	1930.07	1174.97	1690.01	2118.47	1850.56	1863.24	2110.58	1663.34
	188	2028.31	2081.14	1303.37	1752.11	2232.33	1942.76	1850.99	2103.07	1734.29
	189	2153.73	2209.67	1423.5	1794.32	2314.99	2014.99	1827.24	2084.03	1790.63
	190	2256.93	2300.19	1521.19	1814.87	2368.28	2067.32	1775.39	2059.06	1823.53
	191	2332.53	2364.84	1607.55	1827.15	2391.92	2100.3	1710.72	2024.77	1836.94
	192	2376.62	2397.92	1674.23	1826.85	2386.59	2116.12	1655.78	1992.28	1833.75
	193	2389.89	2393	1717.05	1806.97	2350.44	2099.97	1628.65	1964.54	1809.05
	194	2375.33	2360.8	1741.39	1770.38	2299.97	2066.75	1621.31	1941.67	1772.84
	195	2325.89	2294.79	1740.17	1729.16	2233.61	2020.96	1633.76	1931.61	1725.48
	196	2241.75	2212.26	1711.69	1679.43	2152.47	1963.2	1654.84	1929.65	1672.98
	197	2140.55	2106.99	1663.71	1631.24	2072.3	1897.29	1665.51	1938.4	1612.82
	198	2040.78	1995.2	1607.6	1592.05	1993.21	1831.34	1682.14	1950.26	1557.51
	199	1938.71	1883.13	1544.98	1566.24	1924.67	1775.14	1716.37	1971.45	1512.04
	200	1850.24	1789.58	1482.57	1550.36	1864.79	1724.13	1761.87	2003.94	1476.94
	201	1776.69	1719.01	1423.76	1549.9	1823.73	1701.17	1810.94	2045.03	1449.1
	202	1714.82	1669.96	1369.3	1563.85	1809.45	1692.29	1847.07	2088.91	1436.59
	203	1670.63	1643.42	1325.39	1589.79	1815.2	1697.54	1872.92	2123.96	1435.18
	204	1652.86	1626.96	1293.12	1627.7	1827.83	1705.87	1881.89	2147.25	1438.88
	205	1649	1624.57	1276.62	1670.37	1847.1	1716.75	1870.91	2144.39	1448.99
	206	1655.2	1621.23	1269.74	1707.98	1841.3	1731.34	1844.09	2120.27	1451.94
	207	1654.99	1617.31	1269.94	1729.12	1822.11	1731.52	1794.77	2079.89	1438.65
	208	1647.46	1594.41	1274.74	1731.84	1775.23	1716.3	1731.81	2024.83	1407.8
	209	1624.77	1547.71	1275.56	1705.75	1713.43	1683.53	1665.18	1967.13	1352.22
	210	1576.43	1483.12	1264.1	1660.06	1629.04	1619.97	1606.2	1911.12	1283.61
	211	1505.67	1396.2	1236.15	1587.99	1531.79	1530.12	1563.35	1866.24	1203.88
	212	1412.88	1295.42	1192.26	1499.82	1426.26	1430.69	1547.26	1836.81	1123.77
	213	1301.88	1182.85	1126.62	1408.69	1318.22	1333.76	1548.84	1822.78	1042.58
	214	1183.11	1074.21	1051.89	1321.7	1220.46	1234.23	1564.97	1823.84	972.64
	215	1072	977.957	970.175	1250.63	1142.2	1156.81	1592.85	1844.43	918.897
	216	978.027	905.052	889.362	1200.33	1093.06	1096.65	1636.26	1886.92	893.397
	217	907.01	865.833	818.735	1177.74	1079.92	1059.66	1687.92	1934.39	894.156
	218	868.884	857.199	764.711	1182.94	1098.18	1053.27	1742.65	1975.98	919.222
	219	863.057	882.092	731.536	1221.08	1147.57	1081.89	1787.13	2015.17	959.134
	220	887.914	934.509	725.022	1277.39	1214.19	1129.87	1812.71	2038.88	1014
	221	939.056	1007.27	743.387	1350.31	1287.94	1192.63	1817.71	2038.96	1062.77
	222	1006.19	1083.41	780.885	1424.77	1355.76	1255.3	1793.47	2029.54	1108.42
	223	1078.11	1152.41	832.032	1495.32	1407.03	1310.49	1759.46	2010.47	1140.64
	224	1143.47	1203.15	889.323	1549.49	1440.76	1345.62	1704.46	1965.93	1149.09
	225	1196.5	1229.48	940.637	1580.49	1446.57	1365.79	1632.46	1903.4	1133.39
	226	1222.3	1228.53	981.252	1582.14	1424.44	1363.66	1559.95	1844.4	1094.58
	227	1224.31	1198.9	1002.3	1557.63	1373.54	1333.63	1489.46	1772.78	1038.1
	228	1192.33	1143.62	1002.22	1508.64	1295.31	1282.42	1428.21	1699.66	967.84
	229	1137.47	1062.89	974.803	1443.14	1204.73	1207.26	1372.11	1633.01	898.347
	230	1061.91	970.62	928.049	1365.94	1103.13	1116.13	1327.81	1578.77	826.143
	231	974.778	872.427	862.837	1280.59	1005.04	1019.05	1279.02	1527.57	760.877
	232	879.557	775.241	786.116	1193.68	907.774	927.388	1228.22	1483.46	700.229
	233	784.064	686.003	704.811	1112.13	823.425	839.298	1182.88	1449.11	647.222
	234	692.591	607.474	624.649	1038.43	748.425	763.281	1144.5	1408.07	604.335
	235	610.272	535.217	549.751	974.011	688.033	696.712	1120.63	1366.38	567.587
	236	539.773	477.317	482.33	919.555	637.97	639.156	1101.51	1327.93	537.287
	237	477.482	427.636	423.289	870.963	593.162	589.745	1093.78	1297.56	509.547
	238	423.387	384.193	372.062	828.884	554.284	547.662	1085.3	1277.1	484.533
	239	374.926	345.726	329.491	791.451	518.506	509.143	1072.45	1262.84	459.697
	240	333.48	311.627	291.309	758.441	487.954	476.011	1061.23	1248.27	437.495
	241	296.463	282.601	259.474	727.565	462.943	445.577	1056.88	1240.81	417.26
	242	264.626	257.509	231.18	703.484	442.604	417.51	1059.02	1240.26	399.533
	243	235.877	237.08	205.686	681.889	426.098	392.687	1062.67	1245.42	384.111
	244	209.83	218.323	182.458	666.553	412.744	373.022	1075.97	1257.13	371.245
	245	185.384	202.894	162.118	655.999	402.63	358.393	1086.43	1265.3	360.789
	246	165.708	190.794	143.341	649.603	394.117	346.807	1092.74	1274.23	352.255
	247	148.465	181.741	127.371	646.136	389.341	338.316	1098.78	1275.77	345.068
	248	136.268	175.605	114.379	647.43	388.161	333.202	1108.63	1284.22	338.331
	249	127.127	172.499	103.394	652.311	387.88	330.548	1116.67	1300.68	333.851
	250	120.282	170.65	95.397	660.802	390.074	329.014	1124.25	1317.39	330.043
	251	115.28	170.724	89.7119	669.671	392.311	329.41	1135.96	1338.62	328.339
	252	113.053	174.229	86.1977	678.051	394.719	329.121	1149.18	1350.74	327.933
	253	112.627	179.985	83.7112	686.937	398.697	330.069	1165.32	1359.38	329.278
	254	114.257	186.646	83.0364	698.648	405.647	330.373	1174.31	1366.22	332.271
	255	117.402	195.259	83.4596	711.248	413.697	333.079	1183.38	1375.16	337.196
	256	122.29	203.821	86.1718	724.935	422.257	336.731	1187.85	1388.36	343.65
	257	129.17	212.728	89.8751	739.359	432.102	340.514	1193.01	1400.52	351.71
	258	137.594	222.645	95.752	750.033	439.675	346.215	1197.97	1407.34	360.668
	259	148.097	234.278	101.018	763.961	448.71	352.74	1208.71	1402.91	370.046
	260	159.564	245.732	106.893	782.803	457.395	358.373	1223.43	1399.34	378.921
	261	170.472	257.943	113.347	804.602	466.438	364.889	1229.41	1394.12	387.179
	262	182.26	267.967	120.419	824.79	475.43	372.287	1231.45	1390.1	394.804
	263	193.724	277.23	127.419	845.463	485.027	379.39	1229.71	1387.47	401.632
	264	204.323	284.53	134.723	861.408	492.979	387.043	1222.44	1387.84	407.415
	265	215.356	290.129	140.827	875.093	498.791	395.37	1219.99	1382.54	412.582
	266	225.191	293.476	145.327	890.355	502.432	400.44	1220.4	1374.63	416.546
	267	232.046	294.122	149.606	904.438	503.005	404.3	1224.28	1368.06	419.577
	268	235.857	292.351	152.382	916.326	500.569	407.65	1218.38	1353.75	421.224
	269	238.977	288.092	154.063	925.564	496.015	408.5	1206.29	1337.84	420.507
	270	237.924	282.228	153.909	932.553	488.576	407.846	1192.72	1318.19	417.849
	271	234.834	273.524	153.249	932.486	477.971	405.38	1178.87	1302.59	412.901
	272	229.394	262.629	151.144	930.152	464.764	399.154	1172.94	1289.16	405.953
	273	221.926	249.952	147.364	924.67	450.165	389.061	1172.79	1280.5	396.216
	274	212.049	236.969	142.362	916.549	434.434	377.264	1177.22	1276.55	384.716
	275	201.037	224.037	135.262	905.721	418.857	362.708	1182.8	1280.81	372.517
	276	190.08	212.819	126.035	895.571	405.729	347.159	1192.84	1293.78	360.219
	277	178.423	203.095	117.616	885.105	394.948	332.682	1215.22	1309.9	349.837
	278	166.992	196.054	109.042	878.623	387.058	318.755	1246.72	1336.5	342.292
	279	156.53	190.778	101.606	874.936	383.103	307.234	1285.8	1367.82	337.539
	280	147.839	188.007	95.5737	874.242	381.797	298.405	1319.85	1392.27	335.003
	281	141.737	187.186	91.0487	875.397	383.057	292.918	1350.2	1420.71	334.536
	282	137.663	188.744	87.3302	881.715	385.768	289.888	1377.38	1449.5	336.288
	283	136.737	191.684	86.0781	893.407	392.243	290.463	1401.98	1477.53	340.012
	284	137.215	196.094	85.3468	909.925	400.955	291.276	1429.81	1495.35	345.411
	285	139.295	202.393	85.7221	929.812	412.464	295.064	1454.91	1510.97	352.38
	286	141.331	209.618	87.4619	950.882	424.423	300.517	1471.61	1517.13	362.812
	287	146.084	217.287	90.3586	970.955	438.718	307.462	1480.96	1514.95	374.954
	288	151.486	224.733	94.8117	990.062	452.688	317.317	1490.88	1511.72	387.806
	289	159.576	231.522	99.6123	1009.17	466.175	327.47	1498.77	1509.75	400.344
	290	167.818	236.899	104.41	1026.49	478.808	337.702	1519.7	1514.52	410.809
	291	177.315	240.449	109.584	1043.11	488.858	346.598	1547.67	1527.63	416.269
	292	185.319	242.495	114.942	1056.98	495.821	353.457	1580.14	1541.56	417.878
	293	192.252	243.367	120.617	1073.69	501.099	355.564	1621.71	1564.73	417.054
	294	198.978	243.021	125.549	1092.22	506.875	354.56	1668.78	1602.78	413.918
	295	204.478	242.671	128.554	1113.87	513.477	350.989	1706.56	1642.56	411.623
	296	209.169	243.296	129.542	1141.5	525.233	347.674	1729.05	1676.86	413.628
	297	213.324	246.6	129.288	1180.87	541.798	346.245	1747.01	1699.57	419.546
	298	217.741	251.868	128.608	1226.38	564.83	347.847	1743.05	1706.6	428.905
	299	222.661	259.259	128.562	1277.88	591.629	352.514	1730.5	1688.27	440.639
	300	229.445	267.755	129.974	1334	620.307	358.481	1707.85	1664.98	451.065
	301	238.85	275.891	131.261	1389.02	644.807	367.458	1674.65	1637.11	458.928
	302	248.893	282.982	133.439	1434.44	661.63	376.432	1646.24	1613.32	463.058
	303	258.951	289.703	135.509	1465.34	670.016	384.987	1618.68	1593.81	463.07
	304	268.811	295.501	138.55	1475.88	668.926	391.788	1608.54	1586.58	458.907
	305	274.962	299.029	142.26	1467.44	660.474	395.679	1607.98	1584.83	453.625
	306	278.867	300.438	145.881	1444.45	646.099	396.518	1615.93	1591.25	448.256
	307	278.861	298.533	147.907	1414.17	628.524	394.579	1631	1600.39	443.052
	308	275.102	293.995	149.892	1378.84	611.474	390.752	1644.15	1605.26	440.19
	309	268.586	288.824	150.68	1342.89	595.142	386.461	1650.03	1604.57	438.497
	310	260.777	283.115	150.978	1314.38	580.397	382.705	1640.56	1606.69	439.12
	311	251.132	276.921	150.668	1291.72	570.369	380.811	1642.24	1606.51	441.608
	312	241.845	270.745	149.774	1279.47	563.7	381.751	1650.21	1611.48	447.625
	313	232.885	264.115	147.011	1278.12	561.695	384.933	1664.5	1620.46	454.216
	314	225.189	257.582	143.848	1278.99	563.55	388.324	1691.11	1627.58	462.951
	315	218.844	251.802	140.946	1279.55	567.701	390.068	1721.52	1633.65	473.156
	316	212.702	248.184	138.3	1281.99	573.282	390.209	1747.73	1635.07	486.094
	317	209.095	246.714	135.804	1289.02	582.048	387.168	1773.65	1639.56	501.244
	318	206.969	248.093	133.884	1298.6	593.809	384.289	1807.88	1651.21	516.83
	319	206.943	250.692	132.443	1315.26	606.286	382.492	1846.74	1677.54	528.919
	320	208.417	253.891	131.203	1338.01	622.727	382.846	1885.27	1718.87	535.269
	321	212.719	257.776	131.083	1364.79	641.673	384.387	1928.32	1766.37	535.48
	322	217.392	261.98	131.748	1399.18	661.386	386.615	1990.3	1818.52	531.216
	323	222.665	268.052	132.945	1440.05	678.659	389.675	2053.01	1863.37	525.648
	324	228.034	275.451	134.962	1486.43	695.747	393.121	2098.1	1892.22	519.819
	325	233.2	283.32	137.42	1542.02	711.353	396.264	2129.63	1913.99	516.148
	326	238.046	289.466	139.964	1604.77	725.477	398.656	2156.39	1920.83	511.206
	327	242.725	292.877	143.666	1678.53	739.556	401.093	2173.75	1922.77	505.265
	328	248.216	295.614	147.107	1765.66	750.875	400.873	2178.86	1918.1	498.617
	329	254.304	298.264	149.923	1863.55	758.841	399.209	2176.78	1907.71	491.199
	330	259.433	302.291	151.921	1960.69	762.604	396.563	2163.91	1892.04	486.63
	331	264.031	308.587	154.01	2053.76	770.414	394.325	2145.33	1870.9	487.531
	332	269.302	317.5	155.586	2128.01	783.394	392.919	2128.82	1861.52	495.858
	333	273.921	327.574	157.594	2185.91	800.217	396.285	2146.84	1866.99	507.89
	334	280.074	338.809	161.111	2227.81	820.084	405.212	2199.75	1896.18	527.439
	335	288.955	349.758	164.873	2249.14	838.922	417.973	2269.72	1939.78	548.895
	336	299.579	360.268	169.478	2262.63	864.185	434.337	2360.25	2002.41	574.096
	337	312.453	370.725	175.512	2270.39	894.454	453.936	2459.51	2080.28	606.514
	338	326.675	380.925	181.927	2276.34	941.549	472.04	2560.44	2159.29	650.378
	339	339.992	389.998	188.15	2302.65	1003.79	492.492	2607.01	2223.57	707.766
	340	352.728	398.796	194.703	2353.58	1084.17	521.403	2636.91	2255.3	775.305
	341	365.614	407.427	201.242	2427.41	1176.72	555.853	2625.47	2248.02	853.641
	342	376.79	416.509	206.148	2523.41	1268.5	596.737	2572.01	2211.2	924.55
	343	388.172	427.394	212.096	2615.42	1350.88	644.461	2514	2162.41	974.103
	344	399.565	441.311	218.349	2697.28	1412.4	693.409	2453.75	2116.07	994.344
	345	411.256	457.215	224.993	2753.05	1448.88	737.565	2405.78	2078.64	985.096
	346	424.48	474.773	234.635	2792.62	1463.49	773.418	2355.89	2043.37	963.225
	347	440.355	494.454	247.671	2797.92	1456.31	798.551	2308.07	2000.91	938.596
	348	458.85	513.945	263.42	2775.48	1439.19	808.266	2239.89	1936.67	925.888
	349	478.674	530.577	283.553	2732.99	1412.43	809.744	2155.09	1861.17	920.273
	350	500.165	541.073	308.367	2691.47	1384.7	807.46	2079.82	1782.36	911.687
	351	520.935	545.207	333.92	2652.86	1357.64	800.161	2000.64	1707.41	886.63
	352	539.083	541.72	358.239	2612.73	1327.85	788.159	1951.67	1649.13	845.864
	353	552.409	532.766	376.731	2574.4	1290.69	765.369	1947.23	1627.87	791.357
	354	560.253	522.567	388.607	2527.08	1243.59	734.782	1962	1632.15	733.664
	355	562.416	511.875	390.601	2464.74	1189.93	696.349	1981.5	1646.72	680.089
	356	558.516	503.449	388.085	2411.33	1138.55	661.504	2020	1667.4	642.083
	357	550.719	498.047	381.855	2380.24	1101.82	632.477	2063.39	1687.48	619.695
	358	541.613	495.505	375.81	2353.67	1079.04	613.532	2081.8	1704.38	613.663
	359	533.468	496.008	372.101	2347.86	1074	604.847	2112.37	1722.91	621.695
	360	528.253	501.419	372.363	2360.89	1085.96	601.277	2166.28	1757.1	641.691
	361	526.506	511.518	376.917	2384.47	1113.76	610.113	2219.38	1807.38	671.994
	362	529.073	527.369	384.086	2406.18	1154.86	630.965	2297.28	1878.71	707.165
	363	535.204	550.31	394.337	2439.47	1207.74	664.499	2406.63	1977.56	747.727
	364	544.6	576.449	406.082	2481.43	1271.19	704.342	2529.18	2090.34	792.582
	365	559.021	608.254	418.313	2522.22	1333.45	748.631	2648.93	2200.21	848.513
	366	576.537	644.06	431.721	2573.62	1412.63	788.928	2761.79	2293.86	924.099
	367	595.752	684.028	446.347	2636.58	1515.95	825.395	2868.15	2379.95	1021.14
	368	620.785	729.255	462.415	2732.22	1663.46	861.528	2953.16	2440.51	1128.94
	369	651.123	781.577	481.973	2862.55	1845.33	904.831	3021.53	2489.42	1226.42
	370	689.441	838.421	504.774	3054.9	2053.2	955.82	3081.57	2521.46	1284.79
	371	734.073	896.382	531.459	3296.32	2241.82	1009.5	3133.62	2543.65	1300.56
	372	785.073	953.151	560.966	3601.95	2386.87	1065.26	3155.24	2540.97	1270.45
	373	839.764	1008.2	594.857	3957.54	2483.42	1115.25	3164.63	2543.7	1224.12
	374	901.354	1056.7	630.631	4344.93	2554.48	1159.26	3176.79	2553.54	1183.59
	375	958.798	1109.4	668.127	4716.08	2596.31	1194.36	3231.77	2611.64	1163.87
	376	1019.97	1158.65	707.379	4994.31	2633.84	1227.1	3366.21	2753.98	1162.7
	377	1079.12	1212.75	746.33	5149.67	2670.01	1258.6	3679	3007.02	1185.18
	378	1139.32	1268.8	787.42	5182.18	2693.03	1291.35	4192.86	3445.04	1224
	379	1205.32	1327.17	827.408	5146.77	2695.75	1346.62	4911.61	4058.94	1270.79
	380	1280.34	1401.53	869.228	5082.64	2690.84	1417.98	5771.58	4820.6	1352.49
	381	1362.95	1469.54	915.639	5068.67	2772.94	1493.81	6633.41	5581.95	1604.05
	382	1456.62	1553.9	968.521	5209.57	3081.84	1602.34	7302.18	6201.96	2130.17
	383	1556.49	1801.58	1029.62	5625.59	3967.71	1865.44	7607.65	6504.85	3039.44
	384	1651.91	2634.06	1088.02	6585.18	5487.92	2473.44	7521.5	6460.55	4208.89
	385	1750.94	4045.3	1158.01	8041.94	7520.54	3622.34	7093.8	6118.89	5365.03
	386	2021.54	6100.6	1322.31	9798.63	9626.04	5273.21	6463.29	5538.37	6182.27
	387	2829.66	8301.54	1874.51	11472.4	11276.4	7126.32	5731.17	4918.38	6520.13
	388	4561.42	10005.8	2976.33	12633.4	12179.3	8759.47	5046.81	4331.12	6328.06
	389	6973.6	10937.4	4769.76	13169	12246.1	9819	4452.93	3820.4	5835.04
	390	9586.62	10989.1	6790.31	13049.5	11733	10113.7	3938.52	3396.81	5177.34
	391	11774.2	10455.3	8560.13	12518	10851.6	9856.16	3553.57	3094.8	4521.15
	392	12882.3	9581.73	9694.86	11738.7	9818.29	9141.01	3270.61	2842.08	3881.15
	393	13061	8630.15	9982.77	10843.5	8781.45	8268.67	3061.52	2638.21	3294.79
	394	12532.7	7713.08	9683.92	9941.66	7805.48	7327.81	2929.67	2492.88	2808.09
	395	11696.4	6862.4	9038.36	9113.41	6945.16	6405.16	2832.23	2366.28	2406.64
	396	10695.1	6151.26	8245.59	8356.97	6216.14	5580.1	2774.25	2247.04	2102.09
	397	9687.68	5524.99	7392.18	7766.85	5613.07	4850.27	2732.96	2145.23	1896.79
	398	8709.4	5025.35	6538.94	7270.46	5092.02	4260.85	2695.78	2055.16	1774.08
	399	7778.7	4586.66	5784.38	6848.88	4661.36	3777.27	2638.37	1967.56	1723.43
	400	6929.96	4221.02	5104.18	6500.95	4274.09	3413.41	2581.5	1891.04	1716.58
	401	6178.75	3904.62	4528.44	6206.92	3943.64	3117.33	2532.1	1834.78	1743.44
	402	5522.64	3626	4050.44	5929.34	3670.34	2877.36	2470.87	1788.69	1775.68
	403	4965.87	3371.11	3644.83	5663.26	3457.61	2685.69	2423.14	1749.95	1803.62
	404	4499.16	3128.1	3291.12	5401.85	3294.7	2512.35	2379.78	1725.58	1825.3
	405	4076.51	2897.99	2985.98	5139.58	3167.36	2367.53	2375.3	1715.66	1848.62
	406	3699.99	2676.87	2714.89	4868.04	3053.69	2259.44	2407.3	1707.7	1868.61
	407	3361.1	2484.2	2480.24	4630.59	2943	2170.99	2477.4	1705.87	1885.69
	408	3078.82	2306.73	2287.45	4411.66	2856.74	2112.66	2581.59	1714.77	1901.08
	409	2828.05	2166.24	2134.26	4225.49	2800.9	2087.1	2688.02	1734.63	1906.07
	410	2644.63	2058.09	2008.7	4030.65	2794.74	2073.45	2798.72	1768.96	1904.41
	411	2477.21	1976.5	1917.05	3899.27	2842.96	2076.97	2896.04	1818.54	1911
	412	2351.26	1925.15	1841.57	3813.53	2927.74	2104.24	3028.57	1901.17	1939.55
	413	2259.8	1901.25	1794.95	3788.97	3075.26	2166.2	3154.66	1996.41	2002.39
	414	2218.04	1876.78	1779.67	3823.82	3264.52	2274.74	3264.71	2100.51	2097.1
	415	2194.66	1856.58	1783.36	3966.58	3519.21	2447	3346.04	2196.35	2190.6
	416	2191.32	1852.29	1801.02	4216.91	3839.74	2653.81	3347.81	2268.78	2253.66
	417	2196.61	1850.86	1828.35	4583.5	4190.92	2853.95	3292.27	2308.24	2275.97
	418	2206.55	1854.61	1853.31	5030.95	4542.02	3003.6	3181	2299.86	2253.69
	419	2218.66	1873.42	1869.97	5481.51	4829.41	3074.57	3063.68	2256.23	2217.1
	420	2236.03	1883.76	1874.58	5880.72	4991.83	3065.84	2931.97	2182.4	2174.11
	421	2261.07	1890.6	1879.22	6106.68	5015.39	2997.51	2806.02	2099.25	2124.06
	422	2300.29	1898.36	1885.89	6204.52	4909.56	2890.83	2700.55	2021.63	2056.74
	423	2353.62	1904.8	1896.61	6178.67	4683.41	2777.31	2600.89	1958.22	1983.5
	424	2411.44	1913.81	1910.36	6074.75	4403.47	2669.82	2506.97	1902.61	1916.22
	425	2452.28	1927.85	1927.48	5947.56	4153	2578.47	2411.4	1847.15	1863.67
	426	2484.48	1942.74	1945.12	5833.12	3976.76	2504.31	2314.86	1784.37	1838.93
	427	2497.02	1960.79	1963.28	5759	3873.54	2448.8	2222.7	1715.91	1842.51
	428	2515.68	1983.41	1976.71	5682.61	3888.13	2430.78	2124.14	1643.93	1867.88
	429	2527.84	2028.41	2004.16	5629.72	3959.44	2434.77	2038.19	1585.66	1904.71
	430	2529.58	2115.09	2044.11	5543.31	4021.8	2466.61	1963.14	1538.2	1953.08
	431	2549.28	2225.65	2093.06	5420.11	4055.59	2518.04	1908.58	1497.39	2008.51
	432	2602.51	2363.98	2157.49	5252.82	4014.1	2584.23	1888.62	1484.13	2064.6
	433	2671.14	2504.43	2226.83	5054.1	3945.49	2647.36	1900.03	1481.75	2129.38
	434	2772.32	2631.33	2294.16	4832.4	3860.28	2710.52	1949.01	1510.12	2229.04
	435	2869.72	2759.31	2356.15	4613.54	3800.09	2776.11	2042.12	1567.7	2351.62
	436	2954.65	2890.77	2425.26	4444.82	3792.13	2843.27	2145.16	1653.12	2540.35
	437	3031.67	3029.43	2489.86	4338.24	3843.8	2943.91	2242.22	1745.23	2812.56
	438	3122.92	3165	2539.19	4330.51	3973.2	3082.16	2346.02	1823.56	3137.78
	439	3239.43	3320.48	2598.37	4394.35	4227.96	3256.24	2424.38	1889.54	3462.42
	440	3404.01	3490.82	2685.52	4544.45	4585.4	3468.12	2441.81	1919.9	3746.09
	441	3598.84	3677.09	2793.72	4729.49	5015.18	3733.56	2429.95	1932.74	3935.3
	442	3834.64	3891.84	2938.69	4913.1	5409.81	4065.27	2405.98	1929.5	4015.65
	443	4114.22	4134.67	3096.45	5074.22	5677.73	4419.32	2360.7	1923.9	4047.22
	444	4395.26	4440.22	3276.05	5215.53	5895.23	4766.09	2336.56	1919.1	4083.13
	445	4718.38	5098.77	3461.41	5310.62	6129.07	5071.83	2343.65	1939.59	4255.82
	446	5072.7	6657.76	3685.73	5363.69	6676.29	5370.88	2385	2001.97	4826.28
	447	5589.62	9418.68	3955.21	5413.76	7906.28	5831.81	2507.24	2118.77	5850.21
	448	6429.56	13037.5	4405.4	5529.72	9863.33	7020.55	2705.64	2317.3	7313.04
	449	8540.68	16929.5	5416.66	5765.43	12376	9013.34	2974.88	2571.82	8950.53
	450	12023	20444	7701.49	6376.09	15021.8	11799.2	3249.36	2849.7	10382.6
	451	16856.6	22947.1	11190.6	7348.79	17261.4	14950.7	3476.95	3082.68	11339.7
	452	22038.1	24422.2	15522.4	8667.73	18740.4	17805.1	3563.3	3220.65	11742.4
	453	26545.3	25030.4	19978.5	10025.2	19499.9	19867.2	3528.98	3232.03	11666.5
	454	29684	24959.5	23547.5	11106.8	19552.8	21030.2	3371.76	3127.95	11253.5
	455	31201.8	24373.8	25918.8	11762.5	19150.2	21480	3144.65	2951.49	10626.7
	456	31745.2	23493.2	27054.1	11907.3	18343.2	21313	2881.76	2726.07	9928.37
	457	31553.8	22492.4	27366.8	11664.2	17308.9	20712.8	2612.83	2474.14	9171.31
	458	30871.8	21365.5	26872	11137.3	16108.6	19886.6	2355.97	2222.24	8404.73
	459	29917	20241.8	26027.8	10461.4	14904	18815	2107.94	1991.15	7644.34
	460	28710	19102.2	24874.5	9616.5	13703.6	17663.5	1892.59	1776.73	6888.14
	461	27412.1	18002.3	23609.2	8774.17	12570	16506.8	1711.21	1584.22	6171.97
	462	26079.2	16924.5	22342.5	7992.04	11490.1	15361.1	1561.98	1421.4	5527.61
	463	24608.7	15887	21053.6	7284.19	10486.1	14208.3	1433.67	1272.87	4967.88
	464	23161.1	14883	19726.4	6647.21	9556.47	13107.7	1325.18	1142.21	4486.9
	465	21606.7	13862.7	18384.1	6119.62	8747.29	12013.1	1236.9	1035.6	4082.22
	466	20044.7	12829.2	17029	5607.3	7998.94	10997.7	1154.2	951.316	3745.96
	467	18514.2	11752.1	15566.2	5173.31	7326.9	10081.5	1085.45	872.782	3499.16
	468	17072.4	10702.8	14122.8	4777.22	6755.51	9231.31	1028.85	803.746	3305.34
	469	15599.4	9620.78	12755.2	4408.76	6172.03	8454.46	979.343	741.693	3174.66
	470	14111.4	8582.2	11417.3	4061.07	5628.37	7698.27	936.57	689.605	3074.73
	471	12694.9	7585.73	10165.8	3733.21	5143.08	7029.2	905.954	647.638	3015
	472	11279.2	6642.41	9076.85	3423.78	4682.4	6388.72	885.385	608.046	2972.46
	473	10013.3	5802.02	8077.46	3118.38	4273.23	5850.12	863.116	572.309	2924.61
	474	8815.57	5077.78	7176.74	2843.51	3968.64	5451.7	830.409	538.417	2858.6
	475	7733.86	4443.8	6406.55	2582.64	3751.39	5189.05	792.58	503.971	2726.74
	476	6714.83	3871.53	5756.59	2338.62	3605.48	5049.41	746.55	474.45	2534.41
	477	5819.1	3404.55	5149.73	2111.29	3518.35	5072.92	695.801	448.386	2287.53
	478	5030.2	3010.33	4682.23	1908.88	3464.66	5145.37	647.453	425.482	2037.49
	479	4364.42	2687.71	4285.4	1750.47	3369.53	5176.71	599.906	403.809	1789.78
	480	3809.43	2406.32	3950.04	1627.52	3215.23	5116.22	557.205	384.801	1579.68
	481	3336.12	2182.55	3636.46	1528.07	3015.29	4899.92	514.646	367.161	1417.74
	482	2950.68	1988.02	3348.77	1446.62	2792.7	4559.68	477.687	350.158	1288.42
	483	2624.43	1824.91	3072.24	1376.35	2547.03	4145.79	446.018	336.884	1179.77
	484	2345.24	1683.11	2804.84	1299.9	2293.57	3695.62	419.35	324.243	1096.91
	485	2120.75	1561.89	2555.24	1239.23	2070.2	3238.33	397.432	313.091	1028.63
	486	1936.34	1459.01	2323.73	1179.37	1847.08	2832.79	379.237	303.027	965.959
	487	1780.23	1379.99	2104.83	1120.84	1637.02	2496.89	362.876	293.341	913.266
	488	1655.39	1310.01	1903.65	1064.66	1488.83	2192.24	347.559	284.093	862.768
	489	1550.91	1250.56	1734.28	1011.03	1367.65	1946.17	333.376	275.592	812.912
	490	1451.34	1194.67	1594.55	964.921	1274.14	1756.18	320.965	266.962	766.67
	491	1363.19	1141.56	1471.6	927.043	1196.89	1611.89	310.551	258.513	723.726
	492	1285.25	1092.88	1363.15	894.643	1137.72	1504.99	299.189	251.202	687.478
	493	1212.09	1054.33	1274.11	864.903	1083.13	1419.13	289.362	244.301	655.321
	494	1144.62	1023.25	1194.29	837.372	1031.94	1344.69	280.197	238.184	627.576
	495	1090.17	996.681	1138.36	805.887	987.337	1267.41	273.358	232.83	605.258
	496	1043.83	976.341	1085.42	769.257	939.827	1193.85	267.296	227.142	585.128
	497	1010.3	963.28	1039.08	736.119	897.843	1126.02	260.493	221.625	570.796
	498	981.804	950.637	991.503	706.429	858.038	1061.92	253.781	216.917	562.496
	499	950.18	950.081	944.708	680.732	823.519	1003.43	248.156	213.503	562.57
	500	917.16	960.516	902.579	658.33	796.994	953.832	244.25	209.5	573.586
	501	887.698	988.711	872.231	639.426	780.678	919.175	239.282	206.475	592.996
	502	862.854	1026.32	853.677	622.214	776.979	896.521	235.468	202.642	616.492
	503	843.557	1076.09	843.405	608.656	787.587	903.849	230.719	198.462	635.568
	504	837.037	1132.31	846.531	596.672	811.666	930.23	226.049	194.047	646.902
	505	836.97	1179.99	867.795	585.408	840.138	972.259	221.708	189.554	650.569
	506	843.96	1222.28	903.15	574.203	867.544	1026.51	217.472	186.305	644.097
	507	858.744	1249.04	947.115	565.797	882.973	1079.33	212.851	182.425	631.722
	508	878.816	1256.93	990.632	560.219	888.861	1117.91	206.833	178.664	615.329
	509	895.507	1245.04	1019.36	554.364	878.114	1140.77	202.209	174.672	595.744
	510	908.952	1220.69	1023.46	546.189	858.915	1144.73	197.678	171.237	575.273
	511	916.109	1182.1	1011.66	530.447	832.074	1123.35	193.88	169.049	556.146
	512	915.064	1137.66	987.586	510.452	801.378	1084.37	189.875	167.307	540.985
	513	903.87	1089.1	952.314	490.125	768.722	1032.45	185.28	165.478	527.724
	514	885.844	1038.1	908.606	470.596	730.174	974.283	180.931	163.57	518.412
	515	863.93	988.696	858.242	454.566	694.036	914.83	177.871	160.256	511.068
	516	837.31	943.947	804.334	440.168	658.174	855.583	175.519	157.633	506.535
	517	809.612	898.997	751.099	422.761	626.619	803.653	173.744	154.054	506.479
	518	782.825	856.874	704.686	405.727	598.049	756.817	171.947	152.474	506.243
	519	752.889	818.44	662.615	387.747	575.674	712.34	169.181	151.081	507.505
	520	727.144	779.104	625.999	370.545	553.366	675.323	167.115	149.673	514.022
	521	702.328	743.271	596.343	354.808	533.943	640.685	164.892	148.824	521.252
	522	678.06	713.148	569.61	343.899	517.818	608.619	162.708	148.577	529.271
	523	653.701	689.668	546.174	333.237	502.26	586.527	159.71	149.587	542.428
	524	632.424	670.549	525.841	325.789	489.945	569.658	158.412	149.639	558.105
	525	612.664	655.126	507.758	315.985	479.539	556.96	158.385	150.598	572.253
	526	593.904	645.057	490.307	306.515	471.74	544.028	160.285	151.611	589.048
	527	580.076	637.609	474.857	298.409	465.832	533.824	161.925	152.373	608.977
	528	569.389	632.297	461.99	291.969	463.344	522.293	162.315	152.802	627.528
	529	559.632	630.692	450.754	287.406	459.942	511.156	160.973	153.137	651.295
	530	550.284	628.095	442.805	284.705	457.569	503.016	157.84	152.22	683.146
	531	544.698	624.646	438.486	280.715	454.81	494.801	154.036	149.269	715.165
	532	540.635	620.884	436.045	274.807	451.833	484.626	150.184	145.409	748.802
	533	539.098	615.883	434.527	269.753	447.255	478.537	147.046	140.643	782.131
	534	538.654	609.005	433.716	264.095	443.022	471.283	143.523	134.379	813.685
	535	537.724	602.125	432.03	259.05	437.627	463.834	140.409	128.72	840.594
	536	538.025	593.011	428.762	252.726	432.326	457.645	137.905	123.361	864.205
	537	538.849	585.114	425.713	246.419	426.31	454.416	135.286	117.6	882.602
	538	537.337	579.032	422.904	240.46	422.69	454.264	132.55	112.064	895.392
	539	538.497	573.389	421.716	234.98	422.389	456.525	129.386	107.796	900.413
	540	534.418	567.865	422.534	229.689	422.889	460.952	126.365	102.205	897.346
	541	534.033	562.051	426.254	224.668	424.565	464.548	123.863	96.7195	891.207
	542	540.911	555.612	431.695	218.914	426.926	468.151	121.53	93.2543	873.547
	543	548.84	549.806	436.183	213.38	427.81	472.277	119.743	89.6144	850.004
	544	553.267	544.674	439.695	207.886	428.152	477.737	117.832	86.0803	826.444
	545	556.518	540.145	444.172	204.015	427.926	484.291	116.064	83.4168	795.291
	546	563.29	538.127	449.284	200.154	427.988	489.882	114.257	81.2965	757.742
	547	567.209	535.249	452.299	197.01	427.082	494.792	112.531	78.1345	715.88
	548	574.69	531.604	455.48	196.007	425.601	496.425	110.877	75.6552	673.195
	549	581.625	526.86	456.721	196.274	421.673	496.084	109.221	73.6296	627.009
	550	582.529	521.104	455.821	196.78	417.664	493.432	108.074	72.2951	584.751
	551	580.744	514.386	455.23	197.508	412.811	490.662	106.806	70.9598	546.073
	552	576.793	506.8	453.726	196.358	408.15	485.979	106.173	70.5489	505.948
	553	570.42	495.834	452.231	193.237	401.513	481.172	105.495	69.767	468.356
	554	557.273	479.111	451.71	188.017	389.675	477.358	104.856	69.4367	430.005
	555	541.237	457.05	454.689	181.754	374.07	474.443	104.548	69.3054	394.253
	556	522.06	430.178	460.448	175.082	354.235	474.109	105.115	69.4125	359.706
	557	496.136	404.483	464.629	169.657	334.655	470.698	106.202	70.3324	326.663
	558	467.634	385.031	462.334	166.399	319.24	463.632	108.592	71.9294	295.128
	559	441.242	374.881	449.92	167.039	310.303	448.785	112.85	76.5847	266.718
	560	420.569	374.924	428.1	170.543	308.627	426.694	117.788	81.5529	241.638
	561	402.344	381.592	398.125	177.237	317.99	402.752	122.12	87.2796	217.239
	562	391.312	385.762	365.506	183.48	332.879	381.285	124.174	91.2718	196.123
	563	384.509	382.353	335.706	185.484	350.198	362.28	122.927	92.627	176.803
	564	382.731	367.016	308.26	182.595	362.104	347.699	117.565	89.7785	159.989
	565	386.926	340.905	286.426	174.054	360.239	337.609	110.47	83.926	145.207
	566	388.963	308.834	267.39	160.404	342.512	326.504	102.897	77.156	132.59
	567	384.652	278.79	248.055	146.214	313.43	311.543	96.242	69.2504	123.059
	568	367.346	250.208	228.689	132.343	279.876	294.437	91.0563	62.446	115.108
	569	342.132	226.358	209.091	119.5	246.957	271.951	87.333	56.8419	109.769
	570	317.34	204.559	190.514	109.744	220.075	249.563	84.213	52.8636	106.228
	571	291.88	186.079	174.101	102.039	198.685	229.064	81.4164	49.6715	101.773
	572	271.318	170.208	160.497	95.5408	181.402	211.366	79.1311	48.1063	96.8643
	573	251.706	158.475	147.854	90.4061	167.5	195.369	76.8661	46.191	92.006
	574	232.589	150.465	135.734	86.527	155.801	181.793	75.1596	44.9106	87.9861
	575	215.379	143.062	126.012	82.4229	146.936	168.128	74.3777	43.9101	84.5299
	576	201.078	136.336	117.135	79.6332	140.302	156.669	73.336	43.4022	82.4013
	577	189.846	130.72	109.868	76.6502	135.46	148.049	72.5603	43.1326	79.9451
	578	179.208	125.327	103.25	74.3503	131.576	141.073	71.6634	42.7871	77.377
	579	172.344	120.398	97.3026	72.4341	128.329	134.886	70.6585	43.035	74.1224
	580	166.823	117.747	91.7703	71.6321	123.44	130.851	69.0299	41.8652	72.4432
	581	163.461	113.632	88.0442	70.7259	117.845	126.631	67.1602	40.5765	71.8186
	582	158.863	110.967	85.0705	69.8481	113.076	121.718	65.3319	39.1845	69.9507
	583	155.781	109.159	82.6944	68.4743	108.853	117.944	63.6505	38.0977	68.1649
	584	151.368	107.859	81.765	67.1681	106.483	115.957	62.672	37.3851	66.147
	585	144.974	105.929	81.5676	65.7935	104.354	114.07	61.7799	36.3315	64.1556
	586	140.19	103.858	82.8457	64.6712	101.677	112.682	61.3938	35.6319	62.0887
	587	135.802	101.624	84.4676	64.0795	98.1962	111.451	60.3766	34.7647	61.2002
	588	131.202	98.2317	84.8333	63.2726	95.3175	109.658	59.857	33.8832	60.1134
	589	128.023	96.6388	83.1272	61.8855	93.2435	107.635	59.4742	34.0032	58.5105
	590	124.953	95.6228	80.0372	60.7448	92.4051	105.729	59.2233	34.6075	57.7875
	591	120.78	94.4561	75.7972	58.7853	93.0421	103.675	57.938	34.6913	56.8023
	592	117.056	93.8751	71.7499	56.1779	94.5226	100.529	56.3924	34.0486	56.8233
	593	112.528	91.7535	67.2393	54.8891	95.5535	96.9274	54.8886	32.9907	55.9625
	594	109.342	88.7676	63.2068	53.7975	96.3711	93.5066	53.2967	31.7109	54.5946
	595	106.239	85.3455	59.2827	53.1256	96.2635	90.1883	52.5334	30.0834	53.4125
	596	103.806	81.6493	56.3404	51.3147	93.8328	87.9271	52.2233	29.4238	52.3494
	597	100.565	77.3654	53.3436	49.5105	90.349	85.1715	51.1235	30.04	50.6813
	598	97.9951	72.9174	50.0202	47.46	85.7645	82.9064	49.7377	29.4686	49.4605
	599	94.9694	68.8399	46.7033	45.6322	82.0512	80.3007	48.8725	28.4523	48.5644
	600	90.618	65.4313	43.5733	43.5626	78.7218	77.7518	48.4907	27.7455	46.5877
	601	86.5721	62.705	41.218	41.6717	76.0782	76.2768	47.6105	27.1254	45.8429
	602	81.4842	62.1148	39.6834	39.0879	74.5902	74.2594	46.6251	25.678	45.7486
	603	78.1358	59.0984	38.5139	37.6946	72.8848	72.6515	45.5306	24.9222	45.0081
	604	75.1383	55.3072	37.6878	36.9896	71.6722	70.9275	44.4516	25.1065	43.3035
	605	71.1744	52.3415	35.9869	36.0817	70.4035	69.6345	43.7168	24.5702	41.9404
	606	67.531	50.4499	34.2386	35.1247	69.7229	68.1798	43.6787	23.4176	40.676
	607	63.8766	49.0823	32.5644	34.0352	67.6813	66.3653	43.6947	22.5092	38.6723
	608	60.2915	48.627	30.892	33.8111	66.8202	64.7986	42.5393	21.3024	37.0199
	609	57.2287	47.1525	28.321	33.4546	65.8224	63.2018	41.7738	20.1393	34.9245
	610	55.0996	44.4763	26.7834	33.4844	65.4113	62.2264	40.5737	20.1897	33.2718
	611	52.2061	43.1164	26.0574	31.7204	64.7872	61.2401	40.0784	20.4878	32.202
	612	48.8285	41.4824	25.1833	29.8172	63.9162	60.3511	39.263	20.9495	32.2159
	613	45.296	40.2561	24.6408	27.6715	62.3253	59.2848	39.3606	20.7017	32.8784
	614	42.414	39.0664	23.8182	26.6329	59.2611	57.3942	39.4012	20.0363	32.9369
	615	39.7669	37.3464	22.3545	25.3222	57.2697	56.2032	38.3703	18.6476	34.6467
	616	38.2248	34.8923	20.9465	24.3513	55.434	56.1778	37.6117	17.0391	34.5677
	617	36.6833	32.8027	19.9517	23.5477	53.2055	56.2214	36.5652	16.2921	34.0228
	618	35.4325	30.3783	18.3716	22.5751	50.9316	56.2478	35.7567	15.5096	32.8832
	619	33.7214	27.9287	17.6511	20.9441	49.1682	55.3959	35.0624	14.7712	30.7403
	620	30.8655	26.6838	16.5081	19.9278	48.2806	54.595	35.5193	14.3332	29.1491
	621	28.6014	26.3753	16.3677	19.3261	48.1969	53.6838	35.7162	14.1863	29.022
	622	26.9041	25.9448	16.3702	19.0334	47.9549	52.666	34.4415	14.0032	29.699
	623	25.6383	25.7693	16.5237	19.0086	46.5855	52.0127	32.864	13.6152	29.2415
	624	24.2956	25.2348	15.9894	18.338	44.111	50.7738	31.7911	13.9472	27.3685
	625	22.686	24.1595	14.5852	17.8318	41.8198	49.6677	30.8184	14.2289	25.8585
	626	19.7819	22.1665	13.4235	17.0204	40.0384	48.8088	30.354	14.1447	24.2696
	627	18.0948	20.2707	12.7678	16.4258	38.3021	47.9933	30.7352	13.8206	23.819
	628	16.9293	19.2642	12.9707	15.3211	36.9797	46.6989	30.9029	13.4608	23.1248
	629	16.3622	18.473	13.0321	15.089	35.2567	45.1979	30.2454	12.539	22.1327
	630	16.411	17.7175	13.516	14.2735	33.3104	43.1211	28.8118	11.5843	21.9301
	631	16.5703	16.692	13.1777	13.0539	31.9933	40.936	27.576	10.3925	20.689
	632	15.7604	15.2458	12.4012	11.5613	30.1219	40.2017	26.9389	9.19922	19.8563
	633	14.3159	13.7939	11.2338	10.1215	28.2916	39.9661	27.0206	8.25824	19.7951
	634	12.405	12.6525	10.3304	8.18782	27.2975	39.5132	27.022	7.54941	19.7025
	635	10.9989	11.2261	8.40662	7.15591	26.7317	38.4535	26.6628	7.62538	18.6629
	636	9.78364	9.68202	6.47374	7.10708	25.592	36.7036	25.8588	7.20755	18.2482
	637	8.8853	8.45351	6.11964	6.7131	24.875	34.8681	24.599	7.23055	17.0017
	638	8.27199	8.20641	6.53105	6.05869	23.5972	32.7716	23.7114	6.65765	15.7311
	639	7.05821	8.12456	7.4038	5.12419	21.7457	32.0111	23.6962	5.98621	15.1118
	640	5.98819	7.38877	7.98826	4.20108	19.7317	30.9663	23.4445	5.28008	15.1727
	641	5.45177	7.02057	7.88804	2.75698	17.6922	29.783	22.8631	4.70908	14.9656
	642	5.69681	5.99742	6.63008	1.4244	15.3878	27.9736	22.0074	4.38722	14.8494
	643	4.96504	5.49657	5.5727	0.569454	13.3015	27.0847	20.5867	4.09267	14.057
	644	3.8078	4.90014	5.23283	0.0150101	12.0899	25.9664	19.2585	3.589	12.3107
	645	3.09953	3.41685	4.66244	0.155218	10.0671	24.6401	18.731	3.21542	11.7087
	646	1.94083	1.7138	3.53352	0.037735	9.05312	23.295	17.8176	3.03657	10.7658
	647	1.22435	0.794283	2.9217	0	7.20221	21.3891	16.2637	3.35626	9.12174
	648	0.26194	0	2.13085	0	5.79182	19.6831	15.911	3.5148	7.88559
	649	0	0.222114	1.16665	0	5.31486	18.1551	16.0734	4.52841	6.49952
	650	0	0	0.745449	0	5.26364	17.1449	15.7706	4.81624	5.86627
	651	0	0	0.0713066	0	4.87916	15.2529	16.0929	4.00273	5.39727
	652	0.0161879	0.0288543	0	0	3.58062	13.4683	16.0127	3.38894	4.83244
	653	0	0.00525434	0.00613141	0.16434	2.68121	12.0682	14.7747	2.16889	4.34424
	654	0	0	0.109805	0	1.97967	10.7752	13.4722	1.13696	3.9452
	655	0	0.262844	0	0.00051369	1.84675	9.70758	12.7052	0.335332	3.48758
	656	0.0343348	0	0.0807639	0.0128764	1.67716	8.15486	12.208	0.336745	3.04072
	657	0	0.0722712	0.366358	0	1.26506	6.97917	11.7581	0.118864	2.64588
	658	0	0	0.0212301	0.00816355	0.616412	6.15407	11.6176	0	1.87455
	659	0	0	0.0014475	0	0	5.16725	10.7505	0.0680759	1.02879
	660	0	0	0	0.175805	0	3.8287	10.0827	0.0360667	0.467316
	661	0	0	0	0	0	2.54214	9.19915	0.568892	0.336714
	662	0	0	0	0	0	1.02185	8.49572	1.37851	0.244047
	663	0	0	0	0	0	0	7.96857	1.48509	0.0420154
	664	0	0	0	0	0	0	8.01625	1.25863	0.0175866
	665	0	0.0293809	0	0	0	0.209781	6.50969	0.877297	0.313952
	666	0	0.017554	0	0.0490222	0.0866903	0	5.18156	0.212339	0.0154609
	667	0	0	0	0.184277	0.0133808	0	3.95009	0	0.273324
	668	0	0	0	0.718034	0.00290186	0	3.41882	0.427056	0.109329
	669	0	0	0	0.756702	0.0372895	0	3.3906	0.908885	0
	670	0	0	0	0	0.0157561	0	3.48408	0.632215	0
	671	0	0.0302728	0	0	0	0	4.11297	0.160619	0
	672	0	0	0	0	0.0231386	0	3.07393	0.229554	0
	673	0	0	0	0	0	0	2.27383	0.16876	0.00598953
	674	0	0.102973	0	0	0	0	0.986352	0	0.255691
	675	0	0.0332951	0	0	0.11241	0	0	0	0.0109877
	676	0	0.0726158	0	0	0	0.0268894	0	0.0152707	0.285947
	677	0	0.0377487	0	0.385918	0	0.125484	0	0.310938	0.761851
	678	0	0	0	0.321257	0.0531878	0	0.400705	0.272989	0.930922
	679	0.230637	0	0	0.196405	0.00843074	0.0999882	0.499911	0.283142	1.20242
	680	0	0.0164766	0	0.0733479	0.0689788	0.0108683	0.919362	0	0.567537
	681	0	0	0	0	0.13973	0	1.58964	0	0.318154
	682	0	0.379538	0	0	0.161068	0	1.14963	0	0
	683	0	0.150571	0	0.0930694	0	0.0343303	1.19864	0.378012	0
	684	0	0.00520577	0	0	0	0.0203836	0.550199	1.57854	0
	685	0	0.219339	0	0	0.002783	0	0.276897	1.71839	0.0504995
	686	0	0	0	0.0782313	0	0	0	1.25632	1.04023
	687	0	0.093535	0	0.0212746	0	0	0	0.207731	0.934741
	688	0.029407	0	0	0	0.125164	0	0.0904298	0	1.23032
	689	0.62834	0	0	0	0	0.02057	0.0596367	0	0.912601
	690	0	0.0491862	0	0	0	0	0.364486	0.0790225	0.154383
	691	0	0.04052	0	0	0	0	0.215625	0.00790226	0.00382388
	692	0	0.209051	0	0	0	0	0	0	0.0122364
	693	0.00226508	0	0	0.0363299	0	0	0	0.237583	0
	694	0.0747792	0.387969	0	0	0.0254134	0	0	0.559426	0
	695	0.00402618	0.20356	0	0	0.187245	0	0.0543608	0.523759	0
	696	0.023425	0.0186588	0	0	0	0	0	0.206217	0.0401529
	697	0.0810733	0.0185616	0	0	0.129792	0	0.0909241	0	0.111652
	698	0	0.0264863	0	0	0.0111649	0	0.179082	0	0.0786186
	699	0.00793847	0.211175	0	0.0387506	0	0	0	0.061683	0.39218
	700	0	0	0	0.0133163	0	0	0	0.442518	0.0919573
	701	0	0	0	0	0.0182603	0	0.138616	1.50857	0.298751
	702	0	0.257162	0	0	0.00846853	0	0	2.01412	0.645574
	703	0.0150234	0.0482052	0	0.0108539	0	0	0	2.12304	0.403165
	704	0.165548	0	0	0.00632779	0	0	0	1.74559	0
	705	0.114498	0	0	0	0	0	0	0.896493	0.135546
	706	0.0469116	0.0165717	0	0	0	0	0	0.0946586	0.477595
	707	0	0.0989392	0	0	0	0	0	0.088326	0
	708	0.0551113	0.1541	0	0	0	0	0	0.453165	0
	709	0.139038	0.114945	0	0	0	0	0	0.213296	0.0582391
	710	0.0794631	0	0	0	0	0	0	0	0
	711	0.0564637	0.0111806	0	0.00917627	0	0	0	0.100656	0.55451
	712	0.0351146	0	0	0.00896331	0	0	0	0	0.792134
	713	-0.0195492	0.276995	0	-0.00335458	0	0	0	0.243164	0.84004
	714	-0.00487532	0.403054	0	0.0343474	0	0	0	0.6101	0
	715	0	0.0199019	0	0.0304797	0	0	0	0.823515	0.00403703
	716	0	0.00133835	0	0.0101466	0	0	0	0.161357	0
	717	0	0.00254489	0	-0.014766	0.0418015	0	0	0	0.0189434
	718	0	0.0110884	0	0	0	0	0	0.0606799	0
	719	0	0	0.0045197	0	0	0.0391634	0	0.00871147	0
	720	0	0.0175123	0	0	0	0	0	0.0753132	0
	721	0	0	0	0	0	0	0	0.0172086	0
	722	0	0.00340282	0.0888243	0	0.0209311	0	0	0.221128	0.394629
	723	0	0.0450106	0.0215626	0	0.0347016	0	0	0	0.191017
	724	0	0.00268437	0.0265783	0	0.0167989	0	0	0	0.222361
	725	0	0.00683521	-0.011762	0	0.0484585	0.0241024	0	0	0
	726	0	0.0209366	-0.00971106	0	0.0268887	0	0.0676651	0	0
	727	0	0.0282547	0	0	0	0.0215204	0	0.00979276	0
	728	0	0.00212052	0	0	0	0.0506489	0	0.0885606	0
	729	0	0.00030021	0	0	0	0.0614319	0	1.07375	0
	730	0	-0.00985492	0	0	0	0.0255277	0	1.30128	0
	731	0	0	0	0	-0.00638501	-0.0167788	0	0.469588	0
	732	0	0	0	0	0.00867996	-0.0214619	0	0.124472	0
	733	0	0	0	0	-0.0154979	0	0	0	0
	734	0	0	0	0	0	0	0	0.219813	0
	735	0	0	0	0	0	0	0	0	0
	736	0	0	0	0	0	0	0	0.360027	-0.17517
	737	0	0	0	0	0	0	0	0.0320503	-1.64768
	738	0	0	0	0	0	0	0	0	-0.470285
	739	0	0	0	0	0	0	0	0	14.5171
	740	0	0	0	0	0	0	0	0	38.6579
	741	0	0	0	0	0	0	0	0	65.0771
	742	0	0	0	0	0	0	0	0	85.2679
	743	0	0	0	0	0	0	0	0	91.2777
	744	0	0	0	0	0	0	0	0	83.4136
	745	0	0	0	0	0	0	-0.00821849	-0.095429	71.4068
	746	0	0	0	0	0	0	-0.697935	-0.183171	71.6967
	747	0	0	0	0	0	0	-3.44048	-1.42162	71.971
	748	0	0	0	0	0	0	-1.06367	-1.17624	63.009
	749	0	0	0	0	0	0	13.7513	4.06128	46.9003
	750	0	0	0	0	0	0	31.5801	11.2138	25.8966
	751	0	0	0	0	0	0	45.943	16.158	5.77959
	752	0	0	0	0	0	0	51.5142	17.3002	-4.06613
	753	0	0	0	0	0	0	44.4552	14.0811	-2.26711
	754	0	0	0	0	0	0	25.5981	6.89919	0
	755	0	0	0	0	0	0	9.55895	0.289786	0
	756	0	0	0	0	0	0	2.27186	0	0
	757	0	0	0	0	0	0	0	0	0
	758	0	0	0	0	0	0	0	0	0
	759	0	0	0	0	0	0	0	0	0
	760	0	0	0	0	0	0	0	0	0

## Sheet: Figure 5B
Figure 5B: Product formation [%] of DNA and RNA ligation
	log (47 [µM])	Rlig1			hlig1
	1.47712	100	98.2475	98.511	11.4249	9.91132	18.8699
	1.17609	100	96.1318	97.0084	0.545837	-2.90246	-1.20289
	0.875061	98.3243	92.1834	95.246	-2.27622	-3.13816	-3.05952
	0.574031	27.5278	13.8043	34.7122	-2.56713	-4.10826	-2.80195
	0.273001	3.06806	1.07545	8.35509	-3.45762	-4.46345	-2.95323
	-0.0280287	6.82863	0.69686	9.287	-3.67018	-4.36283	-3.16545
	-0.329059	4.93339	0	8.48575	-3.45347	-3.78521	-3.45625
	-0.630089	7.31501	6.31173	9.42808	-3.09471	-4.47902	-2.91441
		Rlig1			hlig1
	Sigmoidal, 4PL, X is log(concentration)				Interrupted
	Best-fit values
	Top	69.95			92.94
	Bottom	1.324			-4.954
	LogIC50	0.6576			1.72
	HillSlope	-6.786			-3.033
	IC50	4.546			52.51
	Span	68.62			97.9
	95% Confidence Intervals
	Top	66,68 to 73,22
	Bottom	-3,312 to 5,961
	LogIC50	0,5845 to 0,7308
	HillSlope	-12,11 to -1,458
	IC50	3,841 to 5,381
	Span	62,88 to 74,37

## Sheet: Figure 5C
Figure 5C: DNA product formation for all active compounds at various hLig1 concentrations
	hlig1 [µM]	DMSO			1			26			36			41			42			47			45			46
	0.5	88.4868	89.7892	77.511	81.0635	78.0851	74.8178	84.6219	85.9221	79.5392	66.2642	80.1709	73.9881	87.3568	90.1164	79.5057	72.119	74.3311	77.4812	89.208	88.0785	81.9651	74.6485	84.8015	83.0749	78.1777	83.718	80.9008
	0.25	85.6062	87.9908	77.4406	69.6395	71.9873	69.1272	76.7676	77.6627	75.5012	64.9943	73.2639	69.6135	86.7364	88.18	76.3211	63.6611	66.5252	71.3194	83.0321	78.4054	79.8458	66.7236	79.3255	78.1702	65.4383	80.0979	76.9075
	0.125	84.959	85.9103	75.5526	57.4587	57.8784	59.6026	69.3167	74.7653	71.2285	53.8111	62.4599	61.0743	79.6627	75.8452	76.0732	39.1528	56.1143	62.5691	73.9505	66.1037	76.6433	44.3863	70.9952	71.7083	60.8908	72.0203	71.4092
	0.0625	78.1635	81.0852	73.8045	19.7095	34.391	43.5752	39.0213	52.249	60.9211	20.9704	38.3347	49.3867	59.0993	56.4484	66.8349	20.859	38.2979	41.6376	53.7038	71.0502	64.1846	16.9589	41.1639	57.0776	46.8388	58.5619	61.0792
	0.0315	53.668	48.8093	61.7112	10.2835	23.1039	13.7046	22.9913	34.3002	43.039	13.0542	16.5072	27.4887	32.8195	34.8543	48.0642	8.9605	14.7712	28.5706	18.8169	46.119	48.8241	8.79045	26.8642	40.3968	19.0703	41.977	36.9312
	0	0	0	0

## Sheet: Figure S7C
Figure S7C: Electropherogram data
		DMSO			30µM compound 1
		60 µM Menadione	40 µM Menadione	0 µM Menadione	60 µM Menadione	40µM Menadione	0 µM Menadione
	1	0	0	0	0	0	0
	2	0	0	0	0	0	0
	3	0	0	0	0	0	0
	4	0	0	0	0	0	0
	5	0	0	0	0	0	0
	6	0	0	0	0	0	0
	7	0	0	0	0	0	0
	8	0	0	0	0	0	0
	9	0	0	0	0	0	0
	10	0	0	0	0	0	0
	11	0	0	0	0	0	0
	12	0	0	0	0	0	0
	13	0	0	0	0	0	0
	14	0	0	0	0	0	0
	15	0	0	0	0	0	0
	16	0	0	0	0	0	0
	17	0	0	0	0	0.928563	0
	18	0	0	0	0	1.53506	0
	19	0	0	0	0	1.60546	0
	20	0	0	0	0	1.40337	0
	21	0	0	0	0	1.42766	0
	22	0	0	0	0	1.59809	0
	23	0	0	0	0	1.55904	2.04058
	24	0	0	0	0	0.794885	1.90927
	25	0.533298	0	0	0	0.604836	1.83559
	26	1.10597	0	0	0	1.02652	1.84558
	27	0.763162	0	0	0	1.11448	2.18365
	28	0.515426	0	0	0	1.36819	2.33772
	29	0.388242	0	0	2.2111	1.09229	2.27925
	30	0.290702	0	0	2.32156	0.618794	2.06637
	31	0.234859	0	0	2.3211	0.295264	1.64519
	32	0.266388	0	0	2.27179	0.298736	1.28737
	33	0.175493	0.900641	0	2.20498	0.43757	1.19532
	34	0.391713	1.45522	0	2.12969	0.570577	1.44961
	35	0.423184	1.14433	0	1.86964	0.715919	1.39122
	36	0.262554	0.989347	0	1.28177	0.557943	1.18884
	37	0.214642	0.936087	0	1.0138	0.195723	0.715013
	38	0.0406552	0.638256	0	0.439684	0.055309	0.0466423
	39	0	0.697115	0	0.385623	0.180339	0
	40	0.0342436	0.533286	0	0.587282	0.134187	0.386849
	41	0.109344	0.439439	0	0.87679	0.0476972	0.125398
	42	0.0281876	0.618153	0	0.904626	0.217453	0.026023
	43	0.330932	0.784406	0.254764	1.06838	0.126791	0
	44	0.536617	0.823812	2.30047	0.655876	0	0.0203053
	45	0.278292	1.06117	2.09006	0.0770552	0	0.293429
	46	0.171515	0.957479	2.08058	0.0911617	0.168357	0.801343
	47	0.23928	0.575245	1.92981	0	0.304255	1.04275
	48	0.10495	0.517449	1.70265	0.204669	0.340537	0.627695
	49	0.21157	0.638986	1.32136	0.219748	0.457774	0.228345
	50	0.299481	0.702335	0.999985	0.431955	0.581954	0.0958931
	51	0.232359	0.64723	1.00471	0.257562	0.795288	0.739734
	52	0.197301	0.504171	1.11278	0.05	0.840447	0.850161
	53	0.237292	0.0794653	1.26275	0.00232668	0.933816	1.04125
	54	0.217649	0.0210588	1.03813	0.151126	0.858892	1.06408
	55	0.20177	0.2023	0.873984	0.560171	0.441463	0.97279
	56	0.183069	0.269347	0.452553	0.683917	0.0991853	0.648137
	57	0.154729	0.176108	0.00864429	0.821272	0.179939	0.276346
	58	0.0159586	0.0931152	0.0761676	0.601089	0.257871	0.342432
	59	0.207472	0.0554496	0.245027	0.0716539	0.0309374	0.0594468
	60	0.102061	0	0.335347	0.220909	0.130369	0.0611257
	61	0.259029	0.144568	0.352617	0.405446	0.206603	0.142759
	62	0.435646	0.265504	0.439038	0.573065	0.127411	0.239875
	63	0.470185	0.206119	0.238766	0.624096	0.0290954	0.106374
	64	0.325406	0.0838434	0.0191761	0.584902	0.00695198	0
	65	0.0619734	0.0683076	0.0249173	0.547621	0	0.0216305
	66	0.0501038	0.0680437	0.276789	0.534789	0.0900739	0.268216
	67	0	0.0572244	0.189676	0.6055	0.0975634	0.374425
	68	0	0.126219	0.59184	0.364064	0	0.257003
	69	0.00323361	0.107635	0.88223	0.305654	0.0110324	0.152744
	70	0.0397154	0.0998724	0.46145	0.0637984	0.142143	0.0715198
	71	0.0362856	0.0160163	0.0729182	0	0	0
	72	0.00067228	0	0.0992296	0	0.123354	0.0613806
	73	0.00908733	0	0	0	0.268168	0.209977
	74	0.0443943	0	0.346413	0.0611039	0.0802659	0.319987
	75	0	0.0181587	0.914222	0.147489	0.176543	0.0437525
	76	0	0.189576	0.943088	0.459383	0.0886889	0
	77	0	0.408621	0.588863	0.458907	0.00314592	0
	78	0.00806961	0.359457	0.287188	0.477721	0.041011	0.0236717
	79	0.00054075	0.217051	0.123995	0.381525	0.186988	0.0847758
	80	0.00853669	0.041232	0.0411386	0.163961	0.0307783	0.194814
	81	0.0440043	0.080193	0	0.0238992	0	0.202113
	82	0	0.0386513	0	0	0.0181764	0
	83	0.0213881	0.038077	0	0	0.0860692	0
	84	0	0.193707	0.180718	0	0.390602	0
	85	0	0.376113	0.621224	0.081825	0.938379	0.187558
	86	0	0.25932	0.669041	0.0919188	1.17157	0.396502
	87	0	0.11598	0.170629	0	1.32549	0.643421
	88	0	0.069751	0	0.0211841	1.54408	0.526211
	89	0	0.00645879	0	0	1.7456	0.298969
	90	0	0	0	0	2.12674	0.0656882
	91	0	0	0	0	2.70384	0.024431
	92	0	0	0.116121	0	3.08207	0.0353357
	93	0	0	0.0401808	0	3.08084	0
	94	0	0.0396132	0	0	3.51155	0
	95	0	0	0.00316339	0	3.71627	0
	96	0	0	0.0725813	0	4.39091	0
	97	0	0.00016774	0	0	5.0792	0
	98	0	0	0.0413894	0	5.63155	0
	99	0	0	0	0	5.95774	0
	100	0	0	0	0	6.42472	0.0332927
	101	0	0	0	0	7.25162	0.450668
	102	0	0	0.205288	0	8.15611	1.06614
	103	0	0	0.0390019	0	9.1443	2.06983
	104	0	0	0	0	10.2742	3.07645
	105	0	0	0	0	11.2074	3.98468
	106	0	0	0	0	11.9772	4.64454
	107	0	0	0	0	13.1068	5.29123
	108	0	0	0	0	14.1021	6.14449
	109	0	0	0	0	15.3955	7.12282
	110	0	0	0	0	16.5241	8.35754
	111	0	0	0	0	18.0308	10.0654
	112	0	0	0.779749	0.562903	19.7374	12.4199
	113	0	0	2.39091	2.15028	22.3501	14.8162
	114	1.48707	0	4.09892	4.20662	25.8929	17.7189
	115	4.14008	0.0361366	6.09418	7.46363	31.3077	22.1741
	116	7.39037	1.39704	8.87932	12.1428	39.5008	28.5238
	117	11.8011	5.21504	12.9033	18.9564	51.7662	37.9977
	118	18.4787	11.2424	19.179	29.3128	69.6341	53.1105
	119	29.3404	21.093	30.0578	44.9104	98.4121	76.4573
	120	48.4095	38.5514	46.4315	71.7936	138.843	110.676
	121	77.5936	65.7759	74.185	110.936	198.379	162.215
	122	124.151	110.964	118.381	169.682	282.836	235.609
	123	189.312	175.358	183.418	254.652	399.254	338.784
	124	294.541	274.025	277.093	375.211	559.681	475.978
	125	445.061	411.483	414.848	542.015	769.992	671.928
	126	665.156	608.644	613.381	771.443	1051.49	923.184
	127	959.502	875.963	887.647	1078.35	1407.63	1249.78
	128	1334.55	1235.38	1241.8	1458.91	1837.19	1638.45
	129	1804.65	1685.86	1676.52	1914.84	2319.02	2081.88
	130	2348.75	2217.64	2191.95	2427.45	2844.49	2564.63
	131	2942.26	2791.78	2762.39	2981.91	3379.72	3082.77
	132	3562.85	3393.49	3367.87	3539.14	3883.86	3597.26
	133	4140.79	3963.87	3963.28	4061.18	4345.95	4093.95
	134	4618.56	4467.86	4468.15	4516.92	4719.64	4519.01
	135	4898.56	4822.61	4813.99	4833.5	4941.31	4834.66
	136	4997.19	4999.61	4984.43	4987.53	4999.44	4978.48
	137	4825.65	4929.35	4927.35	4953.97	4869.54	4973.66
	138	4460.27	4668.69	4670.15	4733.1	4589.89	4798.02
	139	3942.57	4206.09	4263.44	4362.19	4182.53	4475.61
	140	3341.45	3645.12	3745.86	3896.87	3711.58	4058.77
	141	2726.4	3040.62	3154.15	3385.24	3208.81	3582.96
	142	2150.6	2440.11	2575.8	2846.5	2718.01	3075.58
	143	1652.12	1907.7	2021.46	2331.01	2238.75	2581.98
	144	1247.25	1452.93	1543	1868.23	1825.25	2126.29
	145	924.782	1093.02	1164.83	1459.73	1463.99	1727.44
	146	696.255	818.197	885.863	1144.89	1176.52	1387.43
	147	533.666	623.937	684.181	908.124	949.387	1120.61
	148	425.791	489.783	544.741	738.518	786.246	914.807
	149	353.233	397.353	444.26	615.766	674.843	761.624
	150	306.788	334.853	373.392	534.369	596.658	651.344
	151	275.571	290.97	322.078	473.215	542.606	572.177
	152	250.552	260.027	287.065	429.426	504.415	514.81
	153	231.27	236.137	259.482	396.794	473.594	472.437
	154	213.867	216.393	236.842	373.934	448.29	439.717
	155	196.495	198.107	216.999	356.33	429.866	413.582
	156	178.841	181.324	200.076	342.974	415.452	392.887
	157	161.589	164.939	183.402	331.91	402.313	375.156
	158	144.113	149.82	167.34	323.7	392.664	359.108
	159	128.316	135.62	151.321	317.235	385.438	344.137
	160	113.95	122.832	136.112	313.246	380.863	332.568
	161	102.035	111.199	121.939	310.684	377.795	323.173
	162	92.2061	101.072	110.589	310.101	377.886	315.862
	163	85.1847	92.324	101.133	313.036	381.584	312.248
	164	80.1819	85.4432	94.8224	319.091	390.973	311.237
	165	77.1286	81.0625	90.5132	327.495	406.59	315.288
	166	76.0052	79.3252	88.9504	339.046	427.779	323.391
	167	76.0962	80.3661	90.0673	354.629	454.091	337.186
	168	78.2504	84.0994	95.4109	374.263	484.282	355.268
	169	81.8186	91.0431	103.856	397.63	519.588	377.972
	170	87.1809	101	116.114	426.549	560.242	405.905
	171	93.727	115.205	132.213	458.738	605.275	438.276
	172	101.946	133.316	154.17	493.906	653.98	475.368
	173	111.81	157.149	182.082	532.12	705.822	517.71
	174	124.019	186.743	218.592	573.456	761.849	562.688
	175	139.175	222.752	262.804	615.958	819.238	612.59
	176	157.692	264.684	318.707	658.32	878.016	669.89
	177	180.029	315.164	385.54	700.878	936.313	730.749
	178	206.175	372.26	464.369	740.465	989.466	795.754
	179	236.655	433.97	555.422	777.778	1039.33	862.947
	180	270.134	504.306	658.513	811.984	1079.17	935.531
	181	307.212	584.891	774.353	841.775	1110.86	1002.82
	182	347.128	664.65	895.789	870.009	1129.77	1069.1
	183	388.268	747.287	1023.81	887.985	1140.43	1129.88
	184	428.087	827.213	1156.95	899.002	1142.98	1178.03
	185	468.547	901.032	1289.56	896.04	1133.76	1213.39
	186	509.376	971.937	1416.62	886.586	1117.93	1236.98
	187	545.125	1041.01	1536.84	871.022	1090.35	1251.98
	188	576.363	1097.35	1648.16	855.851	1055.4	1255.36
	189	600.918	1133.94	1737.38	837.236	1013.45	1250.36
	190	616.765	1152.44	1805.29	813.363	976.484	1234.8
	191	624.394	1152.64	1846.25	788.786	937.763	1205.82
	192	625.848	1141.56	1867.49	763.716	907.825	1173.22
	193	618.823	1119.13	1860.96	745.731	892.14	1139.35
	194	605.198	1087.44	1833.33	739.954	888.585	1108.86
	195	586.143	1046.89	1786.97	743.956	894.862	1081.97
	196	561.978	996.141	1723.67	754.123	913.186	1056.51
	197	537.01	942.463	1650.37	774.933	940.447	1035.98
	198	510.526	893.952	1577.59	804.164	969.167	1024.17
	199	485.203	846.971	1506.93	843.097	1006.99	1021.04
	200	461.517	810.419	1438.06	887.461	1046.06	1026.14
	201	449.031	788.623	1375.26	936.42	1076.71	1029.26
	202	441.845	777.844	1322.5	974.598	1093.91	1029.38
	203	439.378	778.778	1287.69	1002.33	1098.93	1022.1
	204	442.55	788.376	1264.51	1019.26	1084.69	1009.48
	205	452.052	800.308	1254.05	1025.28	1057.3	987.271
	206	462.777	803.791	1250.29	1018.78	1016.73	954.981
	207	473.242	801.784	1254.1	995.475	968.931	915.829
	208	480.928	784.767	1256.79	961.866	920.816	870.061
	209	483.13	753.715	1251.16	919.072	880.372	821.783
	210	474.466	715.182	1226.78	880.228	856.267	778.361
	211	459.969	669.549	1181.15	853.962	846.346	743.615
	212	440.15	620.499	1122.58	844.696	862.428	724.324
	213	416.789	575.65	1051.08	853.494	897.188	724.562
	214	392.608	536.971	976.871	883.96	953.04	749.693
	215	371.786	511.666	905.811	939.502	1025.09	786.038
	216	358.47	502.013	841.936	1011.55	1104.13	830.976
	217	354.299	511.243	800.55	1097.18	1183.38	882.899
	218	361.117	536.755	782.996	1187.73	1253	931.112
	219	378.028	578.107	799.788	1269.91	1304.35	974.837
	220	403.712	632.773	838.141	1330.78	1334.72	1007.79
	221	434.225	692.435	901.443	1373.65	1332.44	1027.71
	222	463.11	751.349	976.896	1385.58	1307.21	1020.75
	223	489.498	799.493	1061.39	1372.58	1259.33	995.037
	224	509.889	823.792	1140.68	1334.12	1196.91	951.244
	225	517.813	828.275	1203.27	1280.63	1126.81	892.192
	226	514.716	810.858	1246.08	1207.49	1054.1	829.127
	227	498.754	776.791	1253.75	1128.77	985.294	768.032
	228	472.293	727.211	1232.97	1049.95	917.669	709.827
	229	436.18	667.011	1179.44	974.714	855.535	656.358
	230	397.206	600.069	1102.17	908.498	796.52	606.049
	231	356.71	530.533	1007.93	852.188	743.775	561.382
	232	316.482	466.536	908.39	803.147	699.274	521.003
	233	280.02	411.619	803.889	760.376	661.671	484.842
	234	248.946	364.331	708.078	726.547	631.505	452.967
	235	223.191	323.415	620.414	695.374	604.541	421.66
	236	202.374	287.673	544.67	669.925	581.192	393.633
	237	184.117	257.669	480.036	649.826	561.738	367.733
	238	167.725	230.25	425.872	633.958	547.674	344.454
	239	152.179	207.001	379.563	621.356	539.636	323.791
	240	137.446	185.282	340.35	613.671	534.679	306.856
	241	123.678	165.611	306.594	609.542	534.071	293.665
	242	110.745	147.81	276.532	609.176	533.387	283.367
	243	98.952	133.05	249.774	611.348	534.192	275.654
	244	88.7102	120.294	224.768	614.747	535.294	269.351
	245	80.3774	110.922	202.164	618.541	536.553	263.887
	246	73.8413	103.574	182.536	622.227	536.683	259.422
	247	69.1085	98.5951	165.773	627.043	537.061	256.125
	248	65.6786	95.6281	151.614	631.313	537.629	253.324
	249	63.6565	94.2814	140.978	636.08	539.336	251.687
	250	62.5623	93.8499	133.087	640.938	541.737	250.429
	251	62.2652	93.9632	127.724	644.805	546.005	249.674
	252	62.5354	94.5047	124.954	650.268	552.274	250.014
	253	63.4493	95.4794	123.626	657.133	561.782	251.972
	254	64.683	97.2901	123.365	667.588	573.009	255.477
	255	66.5803	99.9752	124.125	681.073	585.559	260.86
	256	68.9068	103.24	126.059	692.42	597.899	267.049
	257	71.267	106.922	129.25	705.863	610.298	274.63
	258	74.1081	111.255	134.103	722.032	622.116	283.235
	259	77.4834	116.112	139.671	737.765	632.994	292.242
	260	81.1436	121.519	146.355	752.142	643.748	301.396
	261	85.1131	126.966	154.106	770.873	651.056	310.926
	262	89.2944	132.101	162.297	786.709	655.892	319.309
	263	93.3552	136.743	171.065	795.109	659.421	326.005
	264	97.2623	141.02	180.773	803.27	660.678	330.928
	265	101.16	144.996	190.176	804.121	658.366	333.012
	266	104.484	148.031	198.76	804.115	652.015	332.227
	267	106.668	150.458	206.786	802.31	644.32	329.235
	268	107.746	150.92	213.66	801.497	633.432	323.466
	269	107.176	149.195	218.406	795.944	622.922	314.852
	270	105.566	145.305	220.453	786.641	612.492	304.412
	271	102.493	139.876	220.079	775.503	604.305	292.195
	272	98.1621	132.272	215.91	764.652	596.463	280.205
	273	92.4846	124.064	208.137	755.412	592.751	269.532
	274	86.1801	115.751	197.589	749.42	593.909	260.673
	275	80.113	107.959	185.255	746.345	598.805	253.954
	276	74.3085	101.056	171.624	749.722	605.731	249.191
	277	69.8485	96.0408	158.153	755.797	614.513	245.372
	278	66.3805	92.3167	146.037	769.159	624.778	242.91
	279	63.8841	89.8456	136.08	786.343	635.83	242.181
	280	62.0409	88.8154	128.198	805.781	649.467	242.938
	281	61.1431	88.6465	122.316	824.705	666.858	245.859
	282	60.7538	89.531	118.908	843.009	684.259	251.346
	283	60.9069	90.8323	117.041	860.508	698.891	257.249
	284	61.8925	92.5903	116.024	878.117	710.753	263.63
	285	63.5658	94.8564	115.957	896.354	720.07	270.059
	286	65.8634	98.2454	117.689	913.721	726.836	275.209
	287	68.4888	101.815	120.395	924.683	734.453	278.75
	288	71.2972	105.206	124.382	931.698	745.351	281.343
	289	73.9437	108.461	129.706	937.353	762.627	282.858
	290	76.2903	110.731	135.525	950.581	784.565	283.708
	291	77.9673	112.075	141.302	971.48	820.25	285.636
	292	79.4147	112.882	146.89	1005.38	862.138	290.992
	293	80.3206	112.995	152.739	1052.53	911.077	299.899
	294	81.2762	112.624	157.126	1115.07	960.131	311.344
	295	81.9203	112.893	160.67	1180.01	1004.56	324.31
	296	82.55	114.129	163.358	1247.76	1035.14	336.872
	297	83.1128	115.761	165.368	1307.8	1049.79	347.446
	298	84.0115	118.551	167.756	1348.46	1049.34	352.509
	299	84.9697	121.778	171.502	1362.63	1031.3	354.789
	300	86.173	124.966	176.95	1348.35	1006.9	352.527
	301	87.5712	127.932	183.03	1319.89	977.58	345.81
	302	88.1276	130.042	190.083	1272.21	950.931	337.102
	303	88.4268	130.728	196.337	1224.13	928.145	329.706
	304	88.6241	130.276	200.611	1185.27	914.869	322.987
	305	88.5528	129.351	202.023	1157.39	909.663	319.973
	306	87.8655	128.001	201.467	1136.57	909.855	320.902
	307	87.2542	126.452	197.473	1128.16	914.692	324.84
	308	86.1783	125.24	191.171	1128.86	920.795	328.452
	309	84.9205	123.916	183.281	1129.85	921.799	331.43
	310	84.0677	122.911	174.699	1133.08	922.054	333.69
	311	83.5243	121.59	166.928	1136.27	923.364	333.199
	312	82.968	120.287	160.255	1141.34	930.631	331.361
	313	82.6136	118.742	155.618	1148.38	942.294	329.093
	314	82.536	117.54	151.706	1160.56	960.214	327.473
	315	82.4476	116.574	148.997	1176.69	983.561	324.942
	316	82.7391	116.504	147.409	1196.34	1008.05	323.115
	317	83.2387	117.245	146.774	1224.72	1039.88	324.285
	318	84.2316	118.544	145.942	1258.12	1073.36	325.298
	319	85.2988	119.862	145.404	1303.58	1117.11	327.419
	320	86.727	121.327	145.228	1362.35	1162.91	330.121
	321	88.1639	122.998	145.51	1424.51	1210.63	333.779
	322	89.4199	124.653	146.553	1491.03	1256.47	336.455
	323	90.6014	126.666	148.718	1553.99	1298.55	338.403
	324	91.9758	128.687	150.832	1610.48	1337.58	340.528
	325	93.4762	130.223	152.602	1655.6	1369.74	342.976
	326	94.6093	131.478	154.285	1692.4	1398.34	347.78
	327	95.8608	132.764	156.129	1719.86	1419.6	354.68
	328	97.052	134.137	157.596	1739.61	1432.98	365.973
	329	98.5795	136.031	158.988	1752.79	1438.08	381.034
	330	100.525	138.711	160.77	1758.23	1438.77	398.606
	331	102.694	141.78	163.209	1763.4	1444.25	418.901
	332	105.114	145.519	165.633	1767.5	1463.42	441.159
	333	107.648	149.939	169.771	1777.46	1501.76	465.492
	334	109.959	154.544	174.296	1809.51	1564.43	495.32
	335	112.279	159.024	179.802	1870.68	1640.78	528.923
	336	114.848	163.208	185.887	1956.94	1728.66	564.474
	337	117.15	167.339	193.034	2067.88	1809.23	598.272
	338	119.535	171.386	199.237	2170.33	1870.13	630.532
	339	122.665	175.88	203.89	2252.34	1900.72	654.518
	340	126.291	182.112	208.132	2301.32	1903.5	665.375
	341	131.206	190.51	211.318	2305.8	1882.35	671.048
	342	138.039	200.942	215.572	2281.92	1840.92	666.146
	343	146.297	214.04	222.093	2234.41	1797.27	652.324
	344	155.139	229.164	232.189	2176.71	1747.54	632.805
	345	163.54	242.258	245.998	2109.78	1691.57	608.759
	346	169.985	252.274	265.032	2050.84	1644.49	578.334
	347	173.768	256.459	287.433	1990.23	1603.13	546.966
	348	173.583	254.92	310.791	1938.32	1572.39	519.562
	349	171.119	248.766	329.683	1895.67	1555.19	496.926
	350	167.143	241.816	341.129	1865.94	1553.71	480.036
	351	163.15	235.322	342.003	1850.53	1561.32	471.658
	352	159.798	230.697	333.675	1854.98	1582.2	472.24
	353	157.644	228.308	319.12	1881.29	1621.39	482.201
	354	156.234	227.822	302.816	1929.24	1660.18	499.732
	355	155.475	227.935	288.83	1986.55	1700.23	521.52
	356	155.167	229.421	278.658	2040.72	1736.8	545.592
	357	155.731	232.996	272.579	2082.77	1766.56	568.584
	358	157.174	239.314	270.927	2100.7	1798.18	594.203
	359	159.596	248.752	272.819	2112.36	1846.55	624.774
	360	163.375	260.387	277.812	2138.12	1925.16	665.624
	361	169.589	274.079	286.144	2184.92	2036.83	713.235
	362	177.604	289.975	297.47	2271.04	2185.64	776.493
	363	187.462	307.964	311.962	2397.66	2370.36	845.987
	364	199.436	329.531	329.905	2562.85	2562.61	907.097
	365	213.601	354.906	351.209	2762.19	2777.94	950.635
	366	230.517	383.9	376.277	2996.97	3002.1	974.692
	367	249.23	413.75	403.514	3273.97	3217.45	980.735
	368	269.828	445.885	432.712	3543.16	3375.63	973.827
	369	290.377	474.347	464.367	3761.47	3462.62	969.382
	370	310.466	500.01	499.039	3881.99	3472.5	970.364
	371	329.257	522.529	533.053	3885.54	3381.16	981.699
	372	346.176	543.545	567.569	3812.09	3287.23	1007.44
	373	363.466	562.148	599.619	3718.21	3283.84	1062.03
	374	380.942	586.44	629.533	3671	3409.44	1167.09
	375	399.109	614.963	658.626	3737.8	3826.62	1369.17
	376	419.153	649.947	686.371	4037.32	4626.84	1787.41
	377	440.511	689.58	717.21	4615.13	5716.56	2521.01
	378	466.2	740.496	747.061	5572.32	6884.79	3544.7
	379	507.688	837.126	780.487	6699.1	7905.8	4658.23
	380	589.628	1069.22	823.953	7756.48	8487.99	5597.3
	381	772.01	1673.88	879.494	8526.68	8600	6136.37
	382	1104.82	2664.76	1003.57	8801.62	8263.52	6062.25
	383	1681.31	3970.59	1341.09	8642.02	7684.11	5591.78
	384	2431.04	5295.65	2202.2	8125.94	6956.34	4860.59
	385	3228.85	6270.52	3592.2	7470.44	6220.45	4058.22
	386	3890.42	6687.66	5338.13	6764.27	5541.97	3340.97
	387	4251.61	6525.85	7030.31	6077.75	4964.19	2758.41
	388	4255.04	5999.29	8163.4	5497.77	4483.62	2295.85
	389	3998.98	5301.29	8603.33	5035.18	4105.33	1959.83
	390	3581.14	4550.35	8319.02	4648.17	3798.62	1719.74
	391	3109.42	3858.5	7628.6	4343.11	3570.01	1573.9
	392	2670.77	3261.06	6735.34	4093.23	3385.72	1503.12
	393	2276.21	2775.57	5790.18	3859.51	3246.1	1491.5
	394	1959.43	2426.83	4907.87	3631.36	3125.95	1521.53
	395	1703.41	2171.19	4157.33	3448.27	3038.03	1561.04
	396	1509.61	1982.99	3551.83	3280.78	2969.77	1593.54
	397	1345.03	1818.01	3081.84	3123.4	2914.58	1596.33
	398	1199.24	1665.5	2730.54	3001.05	2856.61	1572.02
	399	1075.18	1526.51	2474.94	2872.06	2778.76	1517.53
	400	968.11	1392.17	2268.84	2737.97	2695.64	1449.77
	401	883.635	1259.3	2085.44	2603.57	2599.06	1389.76
	402	816.757	1143.55	1905.91	2488.81	2529.24	1338.99
	403	773.447	1048.17	1731.87	2384.97	2469.95	1307.08
	404	738.478	976.02	1575.8	2305.39	2440.45	1293.4
	405	711.798	927.892	1446.78	2248.64	2446.1	1299.08
	406	687.755	901.51	1349.87	2209.53	2476	1327.82
	407	663.891	885.14	1277.98	2188.49	2559.82	1372.09
	408	639.011	875.025	1225.06	2208.41	2680.45	1427.99
	409	619.671	881.153	1193.41	2285.68	2859.77	1483.65
	410	606.185	891.318	1175.79	2438.56	3080.67	1529.55
	411	598.919	898.076	1169.82	2654.77	3300.92	1566.13
	412	596.638	909.735	1167.62	2915.06	3505.39	1596.83
	413	598.978	919.537	1167.77	3177.35	3660.71	1621.6
	414	602.375	927.119	1168.42	3414.59	3717.14	1632.88
	415	604.967	932.036	1170.57	3586.89	3690.65	1643.04
	416	610.215	943.315	1174.32	3685.5	3577	1642.29
	417	618.691	956.88	1171.04	3676.48	3431.41	1634.66
	418	630.297	967.707	1169.37	3590.3	3282.39	1629.08
	419	643.425	980.665	1155.36	3465.69	3173.7	1627.31
	420	658.1	993.518	1143.7	3340.82	3101.4	1628.87
	421	665.57	999.341	1137.64	3239.21	3058.15	1628.49
	422	670.922	1002.33	1139.99	3154.03	3022.13	1634.51
	423	672.812	1008.15	1145.93	3079.1	2962.86	1633.99
	424	672.361	1014.64	1148.74	3007.74	2902.53	1630.7
	425	673.162	1022.08	1143.46	2932.03	2817.51	1627.69
	426	676.721	1035.8	1133.81	2845.72	2706.5	1616.92
	427	683.346	1059	1130.45	2745.37	2580.58	1610.01
	428	695.66	1090.35	1134.33	2620.12	2445.44	1603.91
	429	713.066	1123.58	1155.62	2478.42	2326.14	1610.68
	430	728.18	1158.47	1183.28	2344.79	2239.31	1628.26
	431	739.021	1190.82	1224.24	2216.05	2197.05	1677.74
	432	744.638	1210.48	1268.94	2121.01	2204.3	1752.14
	433	748.365	1233.52	1311.04	2057.61	2251.5	1853.82
	434	752.667	1263.25	1355.48	2031.98	2326.86	1990.03
	435	764.693	1303.53	1393.85	2028.2	2412.34	2151.99
	436	783.709	1351.73	1430.08	2055.57	2493.13	2325.06
	437	811.016	1408.49	1484.92	2097.1	2552.16	2494.25
	438	842.629	1473.45	1551.81	2144.02	2592.32	2631.8
	439	874.395	1544.96	1633.36	2190.48	2607.02	2751.54
	440	909.282	1622.66	1725.75	2224.31	2618.94	2827.39
	441	946.506	1705.01	1821.46	2239.27	2647.52	2927.45
	442	988.221	1797.25	1918.38	2234.35	2703.57	3174.87
	443	1036.75	1894.88	2021.87	2241.14	2829.73	3667.67
	444	1089.41	2014.84	2136.65	2258.86	3104.03	4572.83
	445	1144.23	2158.16	2281.41	2340.37	3538.07	5842.24
	446	1205.49	2363.39	2446.31	2484.57	4113.55	7334.91
	447	1280.81	2813.91	2653.75	2752.44	4736.07	8687.44
	448	1373.22	3641.96	2945.05	3135.34	5254.64	9678.24
	449	1472.35	5069.97	3588.39	3595.08	5591.73	10186.6
	450	1608.37	6958.08	4856.72	4050.35	5664.85	10263.8
	451	1880.51	9029.3	7005.85	4392.95	5537.49	9984.98
	452	2391.36	10903	9845.36	4568.68	5236.7	9546.41
	453	3228.82	12222.5	12830.9	4548.77	4862.41	8963.17
	454	4334.96	13003.9	15495	4354.1	4440.1	8264.73
	455	5520.23	13295.3	17185.5	4079.47	4010.46	7550.82
	456	6609.95	13262.5	18046.7	3743.33	3608.92	6823.56
	457	7434.94	13002.1	18144	3404.66	3252.73	6136.06
	458	7889.77	12519.3	17810.9	3079.06	2943.77	5521.99
	459	8078.75	11887.2	17128	2769.24	2682.73	5003.76
	460	8002.16	11132.4	16265.9	2487.93	2469.37	4579.64
	461	7755.19	10380.2	15288	2223.89	2290.53	4255.09
	462	7390.06	9617.98	14174.9	1991.33	2129.01	3985.2
	463	6987.01	8912.31	13113.3	1789.44	1984.95	3759.77
	464	6541.59	8226.77	12069.6	1620.38	1856.97	3565.15
	465	6079.21	7551.79	11075.4	1470.16	1738.68	3375.69
	466	5601.8	6926	10146.6	1341.71	1620.98	3186.14
	467	5102.22	6306.58	9290.69	1222.21	1509.42	2983.04
	468	4592.84	5713.2	8459.84	1106.42	1403.95	2771.37
	469	4100.73	5137.24	7631.94	992.614	1305.41	2537.1
	470	3664.64	4570.17	6873.81	884.057	1212.33	2319.11
	471	3264.79	4034.21	6155.3	792.701	1129.37	2119.15
	472	2920.57	3520.03	5483.35	714.982	1056.2	1951.61
	473	2616.35	3078.24	4872.66	651.633	987.558	1820.42
	474	2339.12	2667.28	4315.7	595.892	920.508	1701.57
	475	2079.87	2334.69	3798.11	553.275	854.757	1585.01
	476	1847.7	2035.47	3340.96	514.183	786.262	1457.15
	477	1640.46	1772.83	2946.08	481.459	718.893	1332.62
	478	1442.82	1552.18	2596.67	452.39	653.711	1206.59
	479	1263.64	1360.97	2293.47	423.717	594.708	1088.18
	480	1099.3	1210.11	2038.28	398.74	540.314	979.15
	481	955.206	1086.95	1824.36	379.765	492.341	882.238
	482	831.14	985.087	1651.89	363.713	452.766	797.37
	483	726.88	899.003	1499.98	350.212	420.409	727.138
	484	639.53	826.733	1362.6	337.415	394.862	671.935
	485	568.504	763.595	1236.31	322.747	368.532	622.846
	486	511.955	709.447	1116.85	309.234	345.828	583.041
	487	463.818	663.331	1000.92	298.079	325.171	549.643
	488	425.247	616.114	900.962	287.336	306.013	520.374
	489	393.246	575.074	814.482	277.387	289.153	493.243
	490	364.975	540.955	743.118	269.334	275.558	469.326
	491	339.856	508.39	683.711	260.86	262.197	447.8
	492	320.461	481.307	637.602	252.087	249.159	428.492
	493	303.757	458.407	599.568	244.067	238.608	414.393
	494	288.346	439.242	566.734	237.415	229.18	406.184
	495	274.83	422.063	538.017	231.503	222.046	405.097
	496	263.625	407.292	513.999	224.901	215.634	412.557
	497	254.213	396.324	492.046	220.059	210.371	430.501
	498	246.704	387.599	472.923	216.425	205.492	455.223
	499	240.044	381.472	454.945	212.525	200.847	484.391
	500	234.103	378.338	438.767	209.834	195.591	512.613
	501	229.675	380.093	424.533	207.054	189.873	532.345
	502	227.843	386.413	414.635	201.798	183.333	538.096
	503	228.374	398.151	407.744	196.775	175.947	530.306
	504	232.135	413.027	406.607	192.813	168.029	507.864
	505	239.021	427.9	408.969	187.489	160.307	475.908
	506	247.613	440.109	418.148	183.452	153.217	440.138
	507	257.855	446.792	431.682	181.169	146.927	405.446
	508	269.248	444.167	447.725	178.607	141.223	373.081
	509	279.808	434.879	463.418	173.805	135.85	346.013
	510	287.389	418.23	473.76	171.076	131.01	323.043
	511	290.164	396.031	476.755	168.96	126.246	305.74
	512	287.019	373.269	469.188	166.755	122.216	290.402
	513	278.066	351.878	455.535	165.403	118.29	278.256
	514	265.398	330.301	436.378	164.9	115.01	267.428
	515	249.989	310.909	415.15	162.131	111.931	257.33
	516	233.903	292.711	393.835	158.763	108.966	248.057
	517	218.315	276.947	373.332	156.869	105.804	239.177
	518	203.201	263.084	355.636	154.67	102.574	230.954
	519	189.885	251.691	338.001	152.265	99.8136	222.176
	520	178.61	241.96	322.464	150.339	96.7342	213.861
	521	169.024	233.914	307.56	147.941	94.5473	206.705
	522	160.786	226.157	294.683	146.377	92.6403	200.713
	523	153.751	219.532	282.31	144.558	90.8229	195.222
	524	147.552	213.798	271.274	143.586	89.0673	190.018
	525	141.673	209.417	262.478	142.354	87.3931	185.329
	526	136.941	205.809	255.229	141.362	85.3992	181.048
	527	132.69	203.519	249.569	140.665	83.2551	177.883
	528	129.457	201.349	244.586	140.095	81.3594	175.432
	529	126.571	200.118	240.484	139.12	79.458	173.697
	530	124.072	199.089	237.261	138.342	77.6795	172.528
	531	122.306	198.839	235.117	137.596	76.166	172.277
	532	120.657	198.874	233.368	136.483	74.5951	172.586
	533	119.474	199.096	233.224	135.252	72.7305	174.182
	534	118.598	199.433	234.382	134.74	71.1294	176.503
	535	117.85	200.383	236.059	133.626	69.3157	178.716
	536	116.88	201.97	237.804	132.184	67.546	181.41
	537	116.091	203.606	239.828	130.679	65.8749	183.593
	538	115.901	205.471	241.183	129.389	64.3006	185.887
	539	115.632	207.684	243.365	127.398	62.5048	188.053
	540	116.411	209.434	246.475	125.835	60.687	190.315
	541	117.474	211.256	251.42	124.484	59.0851	192.214
	542	118.55	213.433	257.473	123.144	57.2811	193.198
	543	119.689	215.709	264.871	121.286	55.7056	193.574
	544	121.069	217.937	272.171	119.25	54.16	193.115
	545	122.3	219.55	279.923	117.129	52.7638	192.453
	546	123.41	221.684	287.8	114.751	51.3733	191.411
	547	124.825	223.635	295.025	113.632	50.0224	190.754
	548	125.674	224.841	301.581	111.997	49.1844	188.665
	549	126.314	225.633	308.161	109.826	47.8565	185.627
	550	126.485	225.253	313.216	107.791	46.8202	181.531
	551	126.604	223.439	317.089	105.899	45.8579	176.243
	552	126.174	220.686	320.628	104.363	45.042	170.046
	553	125.421	217.508	323.583	103.092	44.0545	163.457
	554	124.042	213.573	325.242	102.02	43.1501	157.245
	555	121.901	208.738	325.815	99.7345	42.44	150.117
	556	119.144	203.18	325.149	98.4598	41.8295	142.855
	557	115.659	196.911	321.571	96.6186	41.3235	135.497
	558	111.972	189.547	316.762	95.0888	41.1167	127.843
	559	107.917	182.029	311.374	93.689	40.9523	119.907
	560	103.306	174.194	301.862	92.3688	40.5232	112.14
	561	98.3085	166.364	291.221	91.02	40.0421	104.952
	562	92.8943	158.32	279.599	89.2484	39.4253	97.7394
	563	87.7738	150.284	267.777	88.1212	38.5813	90.9262
	564	82.8621	141.697	255.765	86.7935	37.2671	84.9287
	565	78.3723	134.03	244.08	85.4605	36.015	79.5526
	566	73.9819	126.959	231.307	83.6064	34.793	74.6767
	567	69.477	120.112	217.018	81.8105	33.7139	70.4012
	568	65.4814	114.05	203.375	79.2696	32.768	66.447
	569	61.9967	108.053	190.223	77.6528	32.0981	62.3955
	570	59.0524	102.617	178.683	76.1945	31.585	58.6309
	571	56.6855	97.8415	168.665	74.8787	31.1432	55.4968
	572	54.5323	93.6602	159.414	74.358	30.4135	52.8103
	573	52.5926	89.9296	150.826	73.3555	29.5426	50.3573
	574	50.3783	86.4839	143.291	71.4269	28.5132	48.3109
	575	48.3762	83.5465	136.307	70.146	27.6068	46.1924
	576	46.5247	81.2263	130.123	69.0599	27.2058	44.2473
	577	45.0629	79.2803	125.055	67.4025	26.9029	42.3644
	578	43.8593	77.7303	120.768	66.211	26.5079	40.7562
	579	42.5677	76.0289	116.997	65.6021	25.8263	39.1003
	580	41.8085	74.5632	113.791	64.158	25.1927	37.9725
	581	40.6464	73.1878	110.948	62.6493	24.7121	37.1263
	582	39.8206	72.1523	107.737	61.3006	24.2408	36.3754
	583	39.463	71.3386	105.459	59.7806	23.7967	35.3788
	584	38.9231	70.4708	103.661	58.0228	23.0783	34.0299
	585	38.0629	69.7485	101.555	56.9772	22.3782	32.7662
	586	37.2889	69.0299	99.9423	55.4145	21.7832	31.7042
	587	36.5811	69.054	98.7079	54.1778	21.3923	30.795
	588	35.8206	69.0055	97.1651	53.3837	21.2508	30.4961
	589	36.1169	68.9677	95.3873	51.53	20.8893	29.7659
	590	35.7597	68.704	94.013	50.3905	20.7724	28.8707
	591	35.2651	68.5798	91.9127	49.6013	20.5528	27.5624
	592	34.5082	68.1707	89.4742	49.7018	20.4126	26.6879
	593	33.2111	67.5433	87.707	48.7729	20.0383	25.8321
	594	32.2097	67.4828	86.4644	47.9586	19.6004	25.2963
	595	31.1037	67.806	85.2475	46.6983	18.7673	24.7217
	596	30.6127	68.6311	84.353	45.0836	17.8681	23.7166
	597	29.7394	68.962	83.4065	43.5846	17.2968	22.9309
	598	29.1171	68.8833	82.2883	42.9055	16.6347	21.9869
	599	28.1941	69.0188	81.0195	42.6252	16.3195	21.5
	600	27.2188	69.4664	79.8248	42.0743	15.8407	21.2285
	601	26.6799	70.2831	78.192	41.2254	15.5921	20.9542
	602	26.224	71.53	76.5345	40.6089	15.042	20.3519
	603	26.0752	72.4711	75.2609	39.1178	14.5373	19.6164
	604	25.9924	72.0022	74.4638	37.3441	14.0581	19.0122
	605	25.5979	71.4567	73.2562	36.3453	13.497	18.5217
	606	24.7637	71.9061	72.8072	35.3994	13.2213	17.7156
	607	24.0279	71.6099	71.8772	34.1435	12.9556	16.9411
	608	23.1137	72.29	70.4799	33.7538	12.6568	15.9917
	609	22.5163	72.7984	69.2946	33.197	12.417	15.1242
	610	22.0802	72.2082	68.1109	32.1533	11.7051	14.6635
	611	21.341	71.5067	67.071	30.9708	10.6209	14.1575
	612	21.5362	70.6032	65.5446	30.1559	9.86363	13.8165
	613	21.2649	69.4392	63.9537	28.6626	9.29687	13.1563
	614	20.7487	68.9806	62.3041	27.7312	9.10176	12.9956
	615	20.2906	68.4156	60.6356	28.0807	9.24767	12.258
	616	20.3024	66.6766	58.9516	27.2704	9.18132	11.9557
	617	20.1342	63.9386	57.9505	25.9401	8.77668	11.5355
	618	20.1141	60.9205	56.2857	25.0065	8.1787	11.1949
	619	20.2539	57.976	54.1092	23.7037	7.43447	11.0478
	620	19.8983	55.4739	51.6366	22.7888	6.81161	11.4413
	621	19.1316	54.0638	49.0489	22.6473	6.35679	11.574
	622	18.6663	52.2149	46.3338	22.4897	5.94268	11.0878
	623	18.2303	50.0028	43.812	21.344	5.57395	10.3005
	624	17.9171	47.6218	42.1266	20.3478	5.36431	9.16427
	625	17.645	45.3715	40.0781	19.1073	5.5429	8.69989
	626	17.4834	43.3984	38.2708	17.4434	5.30689	8.07955
	627	17.561	41.2978	36.871	16.2398	4.87056	7.92963
	628	18.0407	39.1923	35.5298	15.7302	4.38731	7.48197
	629	18.3593	37.3016	33.5121	15.2312	3.70063	7.22963
	630	18.5365	35.1112	31.9336	14.9822	3.16976	7.00117
	631	18.497	33.3884	30.8035	14.9141	2.80574	6.75837
	632	18.2572	31.7548	29.1244	14.2456	2.57082	6.7213
	633	18.1448	30.756	26.7661	13.495	1.67806	6.58782
	634	18.0385	29.3878	24.712	13.1035	1.0008	6.80714
	635	17.8045	27.9195	21.9929	12.0641	0.659061	6.3448
	636	17.6749	25.9742	20.1263	11.4866	0.270485	6.21828
	637	17.15	23.6598	18.6188	10.8149	0.0116252	6.08848
	638	16.5844	21.6148	16.7567	9.96528	0	5.85914
	639	16.218	20.1815	14.9513	9.52366	0	5.3064
	640	16.3231	19.1652	13.3825	10.003	0	4.80786
	641	16.3974	17.983	11.9535	9.83782	0.124247	4.27936
	642	15.9954	16.5823	10.7744	9.34751	0.28717	3.2198
	643	15.4197	15.3595	9.15384	8.50515	0.298489	2.29296
	644	14.4632	13.7968	6.75444	7.11824	0.0151989	1.8642
	645	13.4538	12.5497	3.98523	6.1287	0	1.4344
	646	12.7945	11.8146	2.29902	5.51055	0	0.682505
	647	12.387	10.8773	0.710506	5.08413	0	0.524248
	648	11.9115	9.61998	0	4.67009	0.0076279	0.395165
	649	11.1798	8.27815	0	4.4181	0.00916223	0.140351
	650	10.3251	7.11902	0	3.79787	0.0616368	0.0810227
	651	9.46567	6.03609	0	3.31218	0	0.0212745
	652	8.4581	5.09724	0	2.98244	0	0
	653	7.60891	4.46176	0.133806	2.23636	0	0
	654	6.65996	3.17956	0	2.10957	0.0298028	0.0650023
	655	5.74924	1.94412	0	2.22819	0.0305124	0
	656	4.88985	0.941862	0	1.8665	0.00541529	0.251595
	657	4.17868	0.287597	0	0.968448	0.0137639	0.0825374
	658	3.52758	0.0288008	0	0.200832	0.0519256	0.00242415
	659	2.78167	0	0	0	0	0
	660	2.13996	0	0	0	0	0
	661	1.3403	0	0	0.0422555	0	0.141799
	662	0.310021	0	0	0.517629	0	0.0868969
	663	0.00922915	0	0	0.283579	0	0.319595
	664	0	0	0.264276	0.0230594	0	0.203488
	665	0	0	0	0.185153	0.277944	0.0083232
	666	0	0	0	0.11804	0.29874	0.0282113
	667	0	0.00849862	0	0	0.283488	0.00082181
	668	0	0.0149017	0	0.0112793	0.0957151	0.015497
	669	0	0	0	0.0233478	0	0
	670	0	0	0	0.0284542	0.102208	0
	671	0	0.129274	0.00903027	0	0	0.0578721
	672	0	0	0.261375	0.050644	0	0.0940615
	673	0	0	0.140401	0.0255082	0	0.083925
	674	0	0	0	0	0	0
	675	0	0	0.143596	0	0	0
	676	0	0	0	0	0	0.00372131
	677	0	0	0	0	0.240808	0.123448
	678	0	0	0.0523566	0.0281237	0.0334825	0.00152334
	679	0	0.149889	0	0.798488	0.0149872	0.0993953
	680	0	0.418912	0	1.39607	0.013322	0.00517601
	681	0	0.341947	0.0596225	1.57329	0	0
	682	0	0.235516	0.0737527	1.45693	0	0
	683	0	0	0.0865464	0.484137	0.00694657	0.014525
	684	0	0	0	0.0211355	0.0586599	0.0372898
	685	0	0	0	0.0344777	0	0
	686	0	0.0619769	0	0.180515	0	0
	687	0	0.0456547	0	0	0	0
	688	0	0	0	0	0.0342333	0.00607055
	689	0	0	0.00294249	0	0.0385125	0.00052169
	690	0	0	0.00679036	0	0.0337152	0.280836
	691	0	0	0	0.0322782	0.0243287	0.0397701
	692	0.00361692	0.0388736	0	0.0984324	0	0
	693	0.043177	0	0.167287	0.0313169	0	0
	694	0.0162034	0	0.149381	0	0.0195602	0
	695	0	0	0	0.29309	0.0676768	0
	696	0	0	0.0649123	0.0982036	0.0246708	0.0420906
	697	0	0.164508	0	0.0195804	0	0.350935
	698	0	0.248395	0.0473591	0	0	0.114931
	699	0	0	0.00733508	0	0.0316845	0.0908542
	700	0	0	0.0530623	0	0.076705	0.0152696
	701	0.183865	0	0.00223905	0	0.173279	0
	702	0.207725	0	0	0	0.156764	0
	703	0.112313	0	0	0	0.0200707	0.0719734
	704	0	0.013241	0.00486909	0.0912987	0	0
	705	0	0.00280444	0.0411693	0	0	0
	706	0	0.0451359	0.281818	0.126653	0.00704972	0.186727
	707	0	0.213516	0.40439	0	0	0
	708	0	0.144877	0.255917	0	0	0
	709	0	0	0.0260736	0	0.0219261	0
	710	0.0152551	0	0	0	0.00166528	0
	711	0.0847297	0	0	0	0.0094143	0
	712	0.139434	0	0.00766617	0.0776945	0	0.0146003
	713	0	0	0.0671794	0	0	0.0384389
	714	0.00072066	0.0191045	0.0114091	0	0.0351271	0.0320777
	715	0.0060601	0.0113717	0.163196	0	0.063351	0.041419
	716	0.00087464	0.00068984	0.338781	0	0.0228448	0.0025847
	717	0.0215915	0.0245477	0.469776	0	0.0270214	0.255858
	718	0.006169	0.0431206	0.433975	0.272318	0.0417338	0
	719	0	0	0.252421	0.467741	0.00197345	0.0283451
	720	0	0.0249555	0.0660709	0.23395	0.0117699	0.00300744
	721	0.0139871	0.250002	0.0043213	0.00059819	0.0180129	0
	722	0.0171455	0	0.0573126	0.0906444	0.0393068	0
	723	0	0.0227628	0.122764	0.225508	0.0392574	0.0649215
	724	0	0.00012604	0.114673	0.493165	0.030334	0.490882
	725	0	0.00145729	0.0558662	0.769489	0.0110639	0.00800055
	726	0	0	-0.00669001	0.703301	-0.0164	0.138375
	727	0	0.188612	-0.0237445	0.328547	0	0
	728	0.00462985	0.183653	0.0251899	0	0	0
	729	0.0313933	0	0.0640783	0	0	0.00571278
	730	0.205462	0	0.0951179	0.292144	0	0.0945294
	731	0.229679	0.147719	0.0994556	0.772479	0	0.177942
	732	0.200451	0.31041	0.0873089	1.1387	0	0.0675839
	733	0.182721	0.920249	0.0440325	1.9619	0	0.236686
	734	0.427226	1.68241	-0.00501965	2.53352	0	0.128243
	735	0.543327	2.19355	0.0132789	2.45664	0	0.0812185
	736	0.634318	2.22114	0.00026956	2.58279	0	0
	737	0.625086	1.93392	0.00185734	2.1735	0	0.0308425
	738	0.36482	1.30387	0.00049166	1.12642	0	0
	739	0.0936428	0.661558	-0.00056099	0.169804	0	0.0073174
	740	0.00567534	0.105754	-0.00012717	0	0	-0.0468954
	741	0	0	0	0	0	-0.0113733
	742	0	0	0	0	0	-0.00867804
	743	0	0	0	0	0	0
	744	0	0	0	0	0	0
	745	0	0	0	0	0	0
	746	0	0	0	0	0	0
	747	0	0	0	0	0	-0.63535
	748	0	0	0	0	-1.76765	-7.55059
	749	-0.0408535	0.241807	0	0	-10.5059	-10.9235
	750	-0.039319	-1.43267	0	-6.57023	-4.2415	0
	751	-0.00914286	-10.0747	-3.49625	-2.68174	0	22.3216
	752	-0.21643	-4.7231	-16.6051	0	0	80.3265
	753	-4.63509	0	-4.74389	0	11.5268	137.248
	754	-10.6492	0	0	4.20809	39.0999	180.405
	755	-1.23961	1.48438	0	37.3847	46.3822	180.575
	756	0	31.7089	18.9263	58.7888	27.8752	145.121
	757	0	38.7471	54.54	41.0202	13.5526	96.6948
	758	0	17.4006	48.1423	18.3363	5.78371	38.3274
	759	0	3.12896	16.6113	4.42335	0	0
	760	0	0	0	0	0	0
